# Supplementary material for: Integrating TB and non-communicable diseases services: Pilot experience of screening for diabetes and hypertension in patients with Tuberculosis in Luanda, Angola
Source: PLoS One. 2019 Jul 5;14(7):e0218052. doi: 10.1371/journal.pone.0218052 (PMC6611589; doi:10.1371/journal.pone.0218052)
Supplement: S3 File — (XLSX) [file pone.0218052.s003.xlsx]

## Sheet: Foglio1
id	Unit	sex	KNOWN_DIABETES__Y_N_	ETNIC_GROUP	LEVEL_OF_EDUCATION	SMOKE__Y_N_	alcohol	PATIENT_UNDERWENT_TB_TREATMENT	cough	hemoptysis	fever	asthenia	dyspnoea	WEIGHT_LOSS	NIGHT_SWEAT	CHEST_PAIN	HE_SHE_FEELS_POLYPHAGIA__Y_N_	HE_SHE_FEELS_POLYURIA__Y_N_	HE_SHE_FEELS_POLYDIPSIA__Y_N_	HE_SHE_FEELS_WEAKNESS__Y_N_	KNOWN_HYPERTESIVE__Y_N_	MAXIMAL_BLOOD_PRESSURE__mm_Hg_	MINIMAL_BLOOD_PRESSURE__mm_Hg_	RBG_RESULT__mg_dl_	FBS_RESULT__mg_dl_	eta10	BMI
1	DAT	Male	NO	Outro	Secondary education II cycle	No	Yes, sometimes	NO	YES	NO	YES	YES	NO	YES	YES	YES	YES	YES	YES	YES	YES	216	102	85		25-34	20.0773
2	DAT	Female	NO	Kimbundu	Secondary education II cycle	No	No	NO	YES	NO	YES	YES	YES	YES	YES	YES	NO	NO	YES	YES	NO	138	98	85		15-24	24.8639
3	DAT	Female	NO	Kimbundu	Scondary education I cycle	No	No	NO	NO	NO	NO	YES	YES	NO	NO	YES	YES	YES	YES	YES	NO	131	89	90		25-34	26.0933
4	DAT	Male	NO	Other	Secondary education II cycle	No	No	YES	NO	NO	NO	NO	NO	NO	YES	YES	YES	NO	NO	NO	NO	159	106		82	35-44	31.21
5	DAT	Female	NO	Kimbundu			No	NO	YES	NO	YES	YES	YES	YES	YES	YES	YES	NO	YES	NO	NO	116	83	164		45-54	20.5688
6	DAT	Male	NO	Kimbundu	Scondary education I cycle	No	No	YES	YES	NO	YES	YES	YES	YES	YES	YES	YES	YES	YES	NO	YES	75	56	115		35-44	26.1493
7	DAT	Female	NO	Other	Scondary education I cycle	No	No	YES	YES	NO	YES	YES	YES	YES	YES	YES	NO	NO	YES	YES	YES	89	58	104		35-44	19.0039
8	DAT	Male	NO	Other	Secondary education II cycle	No	No	YES	YES	YES	YES	YES	NO	YES	YES	YES	YES	NO	YES	YES	NO	130	80	79		25-34	22.2063
9	DAT	Female	NO	Kimbundu	Primary education	No	No	NO	NO	NO	NO	NO	NO	NO	NO	YES	NO	NO	YES	NO	NO	118	71	107		15-24	25.9107
10	DAT	Male	NO	Kimbundu	Scondary education I cycle	No	No	YES	YES	NO	YES	YES	YES	NO	YES	YES	NO	NO	NO	YES	NO	149	95		120	55+	23.7332
11	DAT	Female	NO	Kimbundu	Primary education	No	No	NO	NO	NO	NO	YES	YES	NO	NO	NO	NO	NO	NO	NO	NO	147	91		107	25-34	27.4756
12	DAT	Female	NO	Umbundo	Primary education	No	No	YES	YES	NO	YES	YES	YES	YES	YES	NO	NO	YES	NO	NO	NO	135	104	82		25-34	19.433
13	DAT	Male	NO	Other	Secondary education II cycle	No	Yes, sometimes	YES	YES	NO	YES	YES	YES	YES	YES	YES	NO	YES	YES	YES	NO	150	96		102	45-54	19.4444
14	DAT	Female	NO	Bacongo	Secondary education II cycle	No	No	NO	NO	NO	YES	NO	NO	NO	YES	YES	YES	NO	NO	NO	NO	110	50	100		15-24	17.5278
15	DAT	Male	NO		Primary education	No	No	NO	YES	NO	YES	YES	YES	YES	YES	YES	YES	NO	NO	YES	NO	134	82	131		15-24	26.4004
16	DAT	Male	NO	Kimbundu	Scondary education I cycle	No	No	YES	YES	NO	NO	NO	YES	NO	YES	NO	YES	NO	YES	NO	NO	122	87		83	15-24	21.6297
17	DAT	Female	NO	Other	Secondary education II cycle	No	No	NO	NO	NO	YES	YES	YES	NO	NO	YES	NO	YES	YES	Não	NO	131	72	81		15-24	20.202
18	DAT	Female	NO	Kimbundu	Illiterate	No	No	NO	YES	NO	YES	NO	NO	YES	NO	NO	YES	NO	NO	YES	NO	141	68		95	55+	20.9321
19	DAT	Male	NO	Kimbundu	Scondary education I cycle	No	Yes, sometimes	NO	YES	YES	YES	YES	NO	YES	YES	NO	NO	NO	NO	YES	NO	113	102		94	25-34	20.4152
20	DAT	Female	NO	Kimbundu	Scondary education I cycle	No	Yes, sometimes	YES	YES	NO	YES	YES	NO	YES	NO	YES	YES	YES	NO	YES	NO	127	86		90	35-44	22.68
21	DAT	Female	NO	Kimbundu	Primary education	No	Yes, sometimes	NO	NO	NO	YES	YES	NO	NO	YES	NO	YES	NO	NO	NO	YES	192	102	109		45-54	35.5556
22	DAT	Female	NO	Kimbundu	Instrução primária (1ª - 6ª classe)	No	No	NO	YES	NO	YES	NO	NO	NO	YES	NO	YES	YES	NO	YES	NO	134	89		84	15-24	27.8293
23	DAT	Female	NO	Kimbundu	University	No	Yes, sometimes	NO	YES	NO	YES	YES	NO	YES	NO	YES	NO	YES	NO	YES	YES	116	90		85	15-24	24.5243
24	DAT	Female	NO	Kimbundu	Secondary education II cycle	No	No	NO	YES	NO	YES	NO	NO	NO	YES	NO	YES	NO	NO	NO	NO	128	78		87	35-44	34.2222
25	DAT	Male	NO	Other	Secondary education II cycle	No	No	NO	YES	NO							YES	NO	NO	NO	YES	130	90	77		25-34	22.6757
26	DAT	Female	NO	Umbundo	Primary education	No	No	YES	YES	NO	NO	NO	NO	NO	YES	YES	NO	NO	NO	NO	NO	113	68	82		35-44	16.5166
27	DAT	Male	NO	Kimbundu	Primary education	No	No	NO	NO	NO	NO	NO	NO	NO	NO	NO	YES	YES	NO	YES	NO	174	89	55		55+	19.7055
28	DAT	Male	NO	Kimbundu	Scondary education I cycle	No	Yes, sometimes	NO	YES	NO	NO	NO	NO	NO	NO	NO	NO	YES	NO	YES	NO	129	86		85	25-34
29	DAT	Female	NO	Kimbundu	University	No	No	NO	YES	NO	YES	YES	NO	YES	NO	NO	NO	NO	NO	YES	NO	109	89		90	25-34	20.7031
30	DAT	Female	NO	Bacongo	Illiterate	No	Yes, sometimes	NO	YES	YES	YES	NO	NO	NO	NO	NO	NO	YES	NO	YES	YES	100	59		112	25-34	36.5801
31	DAT	Female	NO	Bacongo	Illiterate	No	No	YES	YES	NO	YES	NO	NO	YES	YES	NO	NO	YES	NO	YES	YES	112	80		99	55+	28.4444
32	DAT	Female	NO	Other	Secondary education II cycle	No	No	NO	NO	NO	NO	YES	NO	NO	YES	YES	NO	YES	NO	YES	NO	129	74		70	15-24	24.7676
33	DAT	Female	NO	Kimbundu	Primary education	No	Yes, sometimes	YES	YES	NO	YES	NO	YES	NO	NO	NO	NO	YES	NO	NO	YES	170	102	113		45-54
34	DAT	Male	NO	Kimbundu	Secondary education II cycle	No	No	NO	NO	NO	NO	NO	NO	NO	NO	YES	NO	YES	NO	NO	NO	133	77		99	15-24	23.2434
35	DAT	Female	NO	Kimbundu	Illiterate	No	No	YES	YES	NO	NO	YES	NO	YES	NO	NO	NO	YES	NO	YES	NO	131	83		150	55+	35.5469
36	DAT	Male	NO	Other	Scondary education I cycle	No	Yes, sometimes	YES	YES	YES	NO	YES	NO	YES	NO	YES	YES	YES	YES	NO	YES	135	82		89	25-34	19.9231
37	DAT	Male	NO	Umbundo	Primary education	No	No	YES	YES	NO	YES	NO	NO	NO	NO	NO	NO	NO	NO	NO	NO	115	80	137		35-44
38	DAT	Male	NO	Bacongo	University	No	Yes, sometimes	YES	NO	NO	YES	NO	YES	YES	NO	NO	YES	NO	NO	NO	NO	125	68		102	25-34	28.3604
39	DAT	Female	NO	Kimbundu	Primary education	No	No	NO	YES	NO	YES	NO	NO	YES	NO	NO	NO	YES	NO	NO	YES	174	95		83	55+
40	DAT	Female	NO	Kimbundu	Primary education	No	No	YES	YES	YES	NO	NO	NO	NO	NO	YES	NO	NO	NO	NO	YES	190	137	109		45-54	24.5243
41	DAT	Male	NO	Kimbundu	Primary education	No	No	NO	YES	NO	NO	YES	NO	NO	NO	YES	NO	NO	NO	NO	NO	109	71		115	55+	17.3313
42	DAT	Male	NO	Kimbundu	Scondary education I cycle	No	No	YES	YES	NO	YES	YES	NO	YES	YES	NO	NO	YES	NO	NO	NO	132	65		98	35-44	21.9713
43	DAT	Male	NO	Kimbundu	Primary education	No	No	YES	NO	NO	YES	YES	YES	NO	YES	YES	NO	YES	NO	YES	YES	119	75		155	35-44	37.324
44	DAT	Female	NO	Kimbundu	Scondary education I cycle	No	No	NO	YES	NO	YES	NO	YES	NO	YES	NO	YES	NO	YES	NO	NO	93	51		74	15-24	35.3386
45	DAT	Female	NO	Kimbundu	Primary education	No	No	NO	YES	NO	YES	YES	NO	NO	NO	YES	NO	NO	NO	NO	NO	168	106		136	35-44	22.0711
46	DAT	Male	NO	Umbundo	Scondary education I cycle	No	No	NO	YES	NO	NO	NO	NO	NO	NO	NO	NO	NO	NO	NO	NO	169	105		120	25-34	28.0664
47	DAT	Female	NO	Kimbundu	Scondary education I cycle	No		NO	YES	NO	YES	NO	NO	YES	YES	NO	NO	YES	NO	YES	YES				101	15-24	13.67
48	DAT	Male	NO	Kimbundu	Primary education	No	No	NO	YES	NO	YES	YES	NO	NO	NO	YES	NO	YES	NO	YES	NO	208	130		108	55+	18.5901
49	DAT	Female	NO	Other	Illiterate	No	No	NO	YES	NO	NO	YES	YES	NO	NO	YES	NO	YES	NO	NO	YES	118	80		94	25-34	17.7778
50	DAT	Male	NO	Other	Secondary education II cycle	Yes >= 10 years	Yes, everyday	YES	YES	NO	YES	YES	YES	NO	YES	YES	NO	NO	NO	NO	YES	145	96		111	45-54	18.6453
51	DAT	Female	NO	Kimbundu	Illiterate	No	No	NO	YES	NO	YES	YES	YES	NO	YES	YES	NO	YES	NO	NO	NO	167	120	101		45-54	30.8248
52	DAT	Male	NO	Kimbundu	Scondary education I cycle	No	No	NO	YES	NO	YES	NO	YES	NO	YES	YES	YES	NO	NO	NO	NO	171	114		81	55+	19.6235
53	DAT	Male	NO	Other	Secondary education II cycle		Yes, sometimes	NO	YES	NO	YES	YES	YES	NO	YES	YES	YES	YES	YES	YES	NO	125	93		95	15-24	21.847
54	DAT	Female	NO	Other	Scondary education I cycle	No	No	NO	YES	YES	YES	YES	YES	YES	YES	YES	YES	NO	YES	NO	YES	185	119		95	25-34	26.2917
55	DAT	Male	NO	Kimbundu	Primary education	Yes <= 1 year	No	NO	YES	NO	YES	YES	YES	YES	YES	YES	NO	YES	YES	YES	NO	99	74	128		35-44	24.6914
56	DAT	Male	NO	Other	Secondary education II cycle	No	Yes, sometimes	NO	YES	NO	YES	YES	YES	YES	YES	YES	YES	NO	NO	YES	YES	124	80		79	15-24
57	DAT	Male	NO		Secondary education II cycle	No	No	YES	YES	NO	YES	YES	YES	YES	YES	NO	NO	NO	NO	YES	NO	120	71	80		35-44	22.2063
58	DAT	Female	NO	Other	Secondary education II cycle	No	No	NO	NO	NO	YES	NO	NO	NO	NO	NO	NO	NO	NO	NO	NO	131	77	101		15-24	18.2531
59	DAT	Male	NO	Other	Secondary education II cycle	No	Yes, sometimes	YES	YES	NO	NO	YES	YES	NO	NO	YES	YES	YES	YES	NO	YES	149	89		107	25-34	25.1429
60	DAT	Female	NO	Bacongo	University	No	No	NO	YES	NO	NO	NO	NO	NO	NO	NO	NO	NO	NO	YES	NO	98	65		82	15-24	19.8413
61	DAT	Male	NO	Other	University	No	No	YES	YES	NO	YES	YES	YES	NO	NO	YES	NO	NO	YES	NO	NO	93	71		87	15-24	18.8092
62	DAT	Male	NO	Other	Scondary education I cycle	Yes <= 5 years	Yes, sometimes	NO	NO	NO	NO	NO	NO	NO	NO	NO	NO	NO	NO	NO	NO	133	71	101		15-24	21.7776
63	DAT	Female	NO	Kimbundu	Secondary education II cycle	No	No	YES	YES	YES	YES	YES	YES	YES	YES	YES	NO	NO	NO	YES	YES			113		35-44	16.6335
64	DAT	Female	NO	Kimbundu	Primary education	No	No	NO	YES	NO	NO	NO	NO	NO	NO	NO	YES	NO	NO	NO	NO	145	87	182		55+
65	DAT	Female	NO	Kimbundu	Secondary education II cycle	No	No	NO	NO	NO	YES	NO	NO	NO	NO	YES	NO	NO	NO	YES	NO	119	81		76	25-34	21.6713
66	DAT	Female	NO	Kimbundu	Primary education	No	No	NO	NO	NO	YES	NO	NO	NO	NO	NO	YES	NO	NO	YES	NO	119	68	87		35-44	24.093
67	DAT	Female	NO	Other	University	No	No	NO	NO	NO	NO	NO	NO	NO	NO	YES	NO	NO	NO	NO	NO	91	59	69		25-34	20.5457
68	DAT	Female	NO	Other	Secondary education II cycle	No	No	NO	NO	NO	YES	NO	NO	NO	NO	YES	YES	NO	NO	YES	NO	117	72		86	15-24	23.7253
69	DAT	Female	NO	Kimbundu	Secondary education II cycle	No	No	YES	YES	NO	NO	NO	NO	NO	NO	NO	NO	NO	NO	NO	NO	126	60	84		15-24	30.7004
70	DAT	Male	NO	Other	Primary education	Yes <= 1 year	Yes, sometimes	NO	YES	NO	YES	YES	YES	YES	YES	YES	YES	YES	YES	YES	NO	109	70	95		35-44	20.5499
71	DAT	Male	NO	Kimbundu	Scondary education I cycle	No	No	NO	YES	NO	NO	YES	NO	YES	YES	YES	NO	YES	NO	YES	NO	142	98		106	25-34	18.3058
72	DAT	Female	NO	Kimbundu	University	No	No	YES	NO	NO	NO	NO	NO	NO	NO	YES	YES	NO	YES	NO	NO	102	64	101		15-24	17.9688
73	DAT	Male	NO	Kimbundu	Secondary education II cycle		Yes, sometimes	YES	YES	NO	NO	NO	NO	NO	NO	YES	NO	NO	NO	NO	NO	130	98	96		25-34	18.9565
74	DAT	Female	NO	Kimbundu	Illiterate	No	No	NO	YES	NO	YES	YES	YES	NO	NO	NO	NO	NO	YES	YES	Sim	115	71	95		35-44	36.7347
75	DAT	Male	NO	Kimbundu	Primary education	No	No	NO	NO	NO	YES	NO	NO	YES	NO	YES	NO	NO	NO	NO	Sim	221	106		160	55+	23.1111
76	DAT	Female	NO	Kimbundu	Primary education	No	No	YES	NO	NO	YES	YES	YES	YES	YES	YES	YES	NO	YES	YES	Sim	134	87		99	45-54	26.2596
77	DAT	Male	NO	Other	University	No	No	YES	YES	NO	NO	YES	YES	NO	YES	YES	NO	NO	NO	NO	NO	127	84	102		35-44	27.102
78	DAT	Female	NO	Other	Primary education	No	Yes, sometimes		YES	NO	YES	YES	NO	NO	YES	YES	NO	NO	NO	YES	YES	135	90			35-44	32.05
79	DAT	Male	NO	Umbundo	Secondary education II cycle	No	No	YES	YES	NO	NO	NO	NO	NO	YES	NO	NO	NO	YES	NO	NO	141	96		90	25-34	29.7521
80	DAT	Male	NO	Other	Scondary education I cycle	No	No	YES	YES	YES	YES	YES	YES	YES	YES	YES	YES	YES	NO	YES	YES	177	133	85		55+	26.493
81	DAT	Female	NO	Kimbundu	Primary education	No	No		YES	NO	YES	YES	YES	YES	YES	YES	YES	YES	YES	YES	YES	125	89	115		25-34	29.0175
82	DAT	Male	NO	Bacongo	Secondary education II cycle	No	Yes, sometimes	YES	YES	YES	YES	YES	YES	YES	YES	YES	YES	YES	YES	YES		132	89	75		25-34	21.1073
83	DAT	Female	NO	Kimbundu	Scondary education I cycle	No	No	YES	YES	NO	YES	YES	YES	YES	YES	YES	YES	YES	YES	YES	NO	96	67	95		45-54
84	DAT	Female	NO		Scondary education I cycle	No	No	YES	NO	NO	NO	NO	NO	NO	NO	NO	NO	NO	YES	NO	YES	117	68		73	15-24	31.2294
85	DAT	Female	NO	Kimbundu	Illiterate	No	No	NO	YES	YES	YES	YES	YES	NO	YES	YES	YES	YES	YES	YES	YES	234	134		77	55+
86	DAT	Female	NO	Kimbundu	Secondary education II cycle	No	No	YES	YES	NO	YES	NO	NO	NO	NO	NO	YES	YES	YES	YES		89	67	86		15-24	19.433
87	DAT	Female	NO	Other	Secondary education II cycle	No	No	YES	YES	NO	YES	YES	NO	YES	YES	YES	YES	YES	YES	YES	YES	115	80		71	55+	20.0475
88	DAT	Female	NO	Kimbundu	Primary education	No	No	NO	YES	NO	YES	YES	NO	YES	YES	YES	YES	YES	YES	YES	NO	198	144		110	45-54	35.0589
89	DAT	Male	NO	Umbundo	Illiterate	No	Yes, everyday	NO	YES	NO	YES	YES	YES	YES	YES	YES	YES	YES	YES	YES	NO	172	129		100	55+	21.0962
90	DAT	Female	NO	Kimbundu	Illiterate	No	Yes, everyday	YES	YES	NO	YES	YES	YES	YES	YES	YES	YES	YES	YES	YES	YES	220	122		115	55+	40.2528
91	DAT	Female	NO	Bacongo	Secondary education II cycle	No	No		YES	NO	YES	YES	YES	YES	YES	YES	YES	YES	YES	YES	NO	144	88		128	35-44	26.2976
92	DAT	Male	NO		Illiterate	No	Yes, everyday	YES	YES	NO	YES	YES	YES	YES	YES	YES	NO	NO	NO	YES	NO	73	55		66	55+	18.4221
93	DAT	Female	NO	Kimbundu	Secondary education II cycle	No	No	YES	YES	NO	NO	NO	NO	NO	NO	NO	NO	NO	NO	YES	NO	108		99		25-34	18.4221
94	DAT	Female	NO	Kimbundu	Scondary education I cycle	No	No	YES	NO	NO	NO	NO	NO	NO	NO	NO	NO	NO	NO	NO		113	65		69	35-44	20.7008
95	DAT	Male	NO	Kimbundu	Scondary education I cycle	No	No	NO	YES	NO	YES	NO	NO	YES	YES	YES	YES	YES	NO	YES	YES	127	75		87	45-54	25.6055
96	DAT	Female	NO	Kimbundu	Illiterate	No	No	NO	YES	NO	YES	NO	NO	YES	NO	YES	NO	YES	NO	YES	NO	165	111		113	55+	19.736
97	DAT	Male	NO	Kimbundu	Scondary education I cycle	No	No	YES	YES	NO	YES	YES	YES	NO	NO	YES	NO	YES	NO	YES	YES	122	70		110	15-24	21.6713
98	DAT	Male	NO	Other	Primary education	No	No	NO	YES	YES	YES	YES	YES	YES	NO	YES	YES	YES	YES	YES	YES	119	95		121	25-34	16.8163
99	DAT	Female	NO	Kimbundu	University	No	No	YES	YES	NO	YES	NO	NO	NO	NO	YES	NO	NO	NO	NO	NO	126	84	108		25-34	21.6441
100	DAT	Male	NO	Kimbundu	Scondary education I cycle	No	No	YES	YES	YES	YES	YES	NO	YES	YES	YES	NO	NO	YES	NO	NO	105	67		71	15-24	19.2234
101	DAT	Male	NO	Kimbundu	Scondary education I cycle	No	Yes, sometimes	NO	YES	YES	NO	YES	NO	YES	NO	YES	NO	YES	NO	YES	NO	102	57		71	45-54	17.6327
102	DAT	Female	NO	Other	Scondary education I cycle	No	No	NO	YES	NO	YES	YES	YES	YES	YES	YES	NO	YES	NO	YES	NO	121	79		62	25-34	22.3082
103	DAT	Male	NO	Other	Scondary education I cycle	No	Yes, sometimes	NO	YES	NO	NO	YES	NO	YES	YES	NO	NO	NO	NO	YES	NO	146	91		73	25-34	22.3082
104	DAT	Male	NO	Kimbundu	Scondary education I cycle	Yes <= 1 year	No	YES	YES	YES	NO	NO	NO	YES	NO	YES	YES	YES	YES	YES	NO	116	87	102		35-44	21.4109
105	DAT	Female	NO	Kimbundu	Illiterate	No	No	NO	YES	NO	YES	NO	NO	NO	NO	YES	YES	YES	NO	NO	NO	132	72		99	55+	26.2222
106	DAT	Male	NO	Umbundo	Scondary education I cycle	No	Yes, sometimes	NO	NO	NO	NO	NO	NO	NO	NO	NO	NO	NO	NO	NO		127	64		59	35-44	20.3125
107	DAT	Female	NO	Kimbundu	Secondary education II cycle	No	No	NO	NO	NO	NO	NO	NO	NO	NO	NO	NO	NO	NO	NO	NO	130	89		84	25-34
108	DAT	Female	NO	Umbundo	Secondary education II cycle	No	No	YES	NO	NO	YES	YES	NO	NO	YES	NO	YES	NO	YES	YES	YES	124	81	116		25-34
109	DAT	Male	NO	Kimbundu	Secondary education II cycle	No	No	NO	YES	NO	YES	YES	YES	YES	NO	NO	NO	YES	NO	YES	YES			97		55+	26.9896
110	DAT	Male	NO	Other	Scondary education I cycle	Yes <= 5 years	Yes, sometimes	NO	YES	YES	YES	YES	NO	YES	YES	NO	YES	NO	YES	YES	NO	117	73	87		25-34	18.711
111	DAT	Female	NO	Umbundo	Illiterate	No	No	NO	YES	NO	YES	YES	NO	NO	NO	YES	NO	YES	NO	YES	YES	116	53		104	55+	18.6667
112	DAT	Female	NO	Other	Primary education	No	No	NO	YES	NO	YES	YES	NO	NO	NO	NO	YES	YES	NO	NO	YES	131	78		268	55+	19.2894
113	DAT	Male	NO	Kimbundu	Scondary education I cycle	No	No	NO	YES	NO	YES	NO	NO	NO	YES	YES	YES	YES	NO	NO	YES	113	70	73		15-24	20.0475
114	DAT	Male	NO	Kimbundu	Primary education	Yes <= 5 years	Yes, everyday		NO	NO	NO	NO	NO	NO	NO	NO	NO	YES	NO	YES	YES	129	107	120		25-34	22.1453
115	DAT	Female	NO	Kimbundu	Illiterate	No	No	YES	YES	NO	YES	NO	NO	NO	YES	NO	YES	YES	NO	YES	YES				93	45-54	13.7656
116	DAT	Female	NO	Other	Scondary education I cycle	No	No	NO	YES	NO	NO	NO	NO	NO	NO	YES	NO	YES	NO	YES	NO	115	66		76	15-24	17.4747
117	DAT	Female	NO	Umbundo	Scondary education I cycle	No	No	NO	YES	YES	NO	YES	YES	YES	NO	NO	NO	YES	YES	YES	NO	119	85		128	25-34	22.0741
118	DAT	Female	NO	Kimbundu	Secondary education II cycle	No	No	NO	YES	NO	NO	NO	NO	NO	NO	YES	NO	NO	NO	YES	NO	129	90		93	55+	24.1217
119	DAT	Male	NO	Other	University	No	No	YES	YES	NO	YES	YES	NO	YES	NO	NO	NO	YES	YES	NO	YES	144	89		247	45-54	33.5938
120	DAT	Female	NO	Kimbundu	Primary education	No	No	YES	YES	NO	YES	YES	NO	YES	YES	YES	NO	NO	NO	YES	NO	108	69		87	15-24	21.3599
121	DAT	Male	NO	Kimbundu	Secondary education II cycle	Yes >= 10 years	Yes, sometimes	YES	NO	NO	NO	NO	NO	YES	YES	YES	NO	NO	YES	NO	YES	134	102		121	45-54	22.6757
122	DAT	Male	NO	Kimbundu	Secondary education II cycle	No	No	NO	YES	NO	YES	YES	NO	NO	NO	NO	NO	YES	YES	NO	YES	161	91		81	15-24	18.6851
123	DAT	Female	NO	Kimbundu	Scondary education I cycle	No	No	NO	YES	YES	YES	YES	NO	NO	YES	YES	NO	YES	NO	NO	NO	129	74	143		15-24	24.2188
124	DAT	Female	NO	Kimbundu	Scondary education I cycle	No	No	NO	YES	NO	NO	NO	YES	NO	NO	YES	NO	NO	NO	NO	NO	106	72		80	15-24	21.3675
125	DAT	Female	NO	Kimbundu	Primary education	No	No	YES	YES	NO	YES	YES	NO	YES	NO	NO	NO	YES	NO	NO	NO	105	79	140		25-34	20.2848
126	DAT	Female	NO	Kimbundu	Illiterate	No	No	NO	YES	NO	NO	NO	NO	NO	NO	NO	NO	NO	NO	NO	YES	217	165		99	55+	20.8889
127	DAT	Male	NO	Kimbundu	Secondary education II cycle	No	No	NO	YES	NO	NO	YES	YES	YES	YES	YES	NO	YES	YES	YES	NO	100	76		75	25-34	21.7738
128	DAT	Male	NO	Kimbundu	Primary education	Yes >= 10 years	Yes, sometimes	NO	YES	NO	YES	YES	NO	NO	YES	YES	NO	NO	YES	YES	NO	156	105		177	25-34	21.0938
129	DAT	Female	NO	Kimbundu	Secondary education II cycle	No	Yes, sometimes	YES	YES	NO	YES	YES	YES	YES	NO	YES	YES	NO	NO	YES	NO	107	78	83		35-44	23.0112
130	DAT	Male	NO		Secondary education II cycle	No	No	NO	YES	NO	NO	NO	NO	NO	NO	NO	NO	NO	YES	NO	NO	109	76		82	25-34	22.1367
131	DAT	Male	NO						NO	NO	NO	NO	NO	NO	NO	NO						131	78			25-34	19.2336
132	DAT	Male	NO	Umbundo	Primary education	NO	No	YES	YES	NO	YES	YES	YES	YES	YES	YES	YES	YES	YES	YES	NO	110	90		130	45-54	22.2063
133	DAT	Male	NO	Other	Secondary education II cycle	NO	No	YES	YES	NO	YES	YES	YES	YES	YES	YES	YES	YES	YES	YES	YES	145	86	96		55+	27.4648
134	DAT	Male	NO	Umbundo	Secondary education II cycle	NO	No	YES	YES	NO	YES	YES	YES	YES	YES	YES	YES	YES	YES	YES	YES	120	68	202		45-54	34.3679
135	DAT	Male	NO	Umbundo	Scondary education I cycle	YES	Yes, sometimes	NO	YES	NO	YES	YES	YES	YES	YES	YES	YES	YES	YES	YES	NO	110	65	135		45-54	19.3337
136	DAT	Male	NO	Kimbundu	Scondary education I cycle	NO	No	YES	YES	NO	YES	YES	NO	YES	YES	YES	YES	YES	YES	YES	NO	140	90		77	15-24
137	DAT	Male	NO	Bacongo	Primary education	NO	No	NO	YES	NO	YES	YES	YES	YES	YES	YES	YES	YES	YES	YES	NO	94	57		128	55+	17.239
138	DAT	Male	NO	Kimbundu	Secondary education II cycle	YES	Yes, sometimes	NO	YES	NO	YES	YES	YES	YES	YES	YES	YES	YES	YES	YES	NO	114	71	118		35-44	19.4932
139	DAT	Female	NO	Kimbundu	Scondary education I cycle	NO	No	NO	YES	NO	NO	NO	YES	NO	YES	NO	NO	YES	NO	YES	YES	194	101	131		45-54	25.7117
140	DAT	Male	NO	Kimbundu	Scondary education I cycle	NO	No	YES	YES	NO	NO	NO	YES	NO	NO	NO	YES	NO	YES	NO	YES	153	97		202	55+	16.0665
141	DAT	Male	NO	Kimbundu	Scondary education I cycle	NO	No	YES	YES	NO	NO	NO	NO	YES		NO	NO	YES	NO	YES	YES	169	123		99	55+	22.4914
142	DAT	Female	NO	Kimbundu	Secondary education II cycle	NO		NO	YES	NO	YES	YES	YES	YES	YES	NO	NO	YES	NO	YES	YES	116	86		92	25-34
143	DAT	Female	NO	Kimbundu	Secondary education II cycle	NO	No	NO	YES	NO	YES	NO	NO	YES	YES	NO	NO	YES	NO	YES	YES	123	67		93	25-34	18.4425
144	DAT	Male	NO	Kimbundu	Primary education	YES	No	NO	YES	NO	YES	YES	NO	NO	NO	NO	NO	NO	YES	NO	NO	136	89	88		35-44	17.0993
145	DAT	Female	NO	Other	Illiterate	NO	No	NO	NO	NO	YES	NO	NO	NO	NO	YES	YES	YES	YES	NO	NO	192	122	89		35-44	29.1363
146	DAT	Male	NO	Umbundo	Scondary education I cycle	NO	No	YES	YES	NO	NO	YES	YES	NO	YES	YES	YES	YES	YES	YES	NO	98	58		88	15-24	18.9866
147	DAT	Male	NO	Kimbundu	Scondary education I cycle	NO		NO	YES	YES	YES	YES	YES	YES	YES	YES	NO	NO	YES	YES	NO	91	67		111	25-34	17.5431
148	DAT	Female	NO																							35-44
149	DAT	Female	NO	Kimbundu	Secondary education II cycle	NO	No	NO	YES	NO	NO	NO	NO	NO	YES	NO	NO	NO	YES	NO	NO	109	52		102	15-24	18.2899
150	DAT	Female	NO	Other	Scondary education I cycle	NO	NO	NO	YES	YES	YES	NO	YES	NO	YES	NO	YES	NO	NO	YES	YES	156	86	96		55+	38.6675
151	DAT	Male	NO																			152	121		83	35-44	15.5896
152	DAT	Female	NO	Kimbundu	Secondary education II cycle	NO	No	NO	YES	NO	YES	YES	NO	YES	YES	YES	YES	YES	NO	NO	NO	127	87		97	15-24	22.1894
153	DAT	Female	NO	Kimbundu	Illiterate	NO	NO	YES	YES	NO	YES	NO	YES	YES	YES	NO	NO	YES	NO	YES	YES	98	70		115	35-44	26.079
154	DAT	Female	NO	Kimbundu	Secondary education II cycle	NO	No	NO	YES	NO	YES	YES	NO	NO	YES	YES	YES	YES	NO	NO	NO	135	85		89	25-34	21.3578
156	DAT	Male	NO	Kimbundu	Scondary education I cycle	NO	Yes, sometimes	NO	YES	NO	NO	YES	NO	YES	YES	YES	NO	YES	NO	NO	YES	142	102	95		25-34	19.7777
158	DAT	Female	NO	Kimbundu	Illiterate	NO	NO	YES	YES	NO	YES	YES	NO	YES	YES	NO						125	80			55+	26.5306
159	DAT	Female	NO		Scondary education I cycle	NO	No	YES	NO	YES	NO	NO	NO	YES	YES	NO	YES	NO	NO	NO	YES	194	125		97	45-54	32.6531
160	DAT	Female	NO	Kimbundu	Illiterate	NO	NO	YES	YES	YES	NO	NO	YES	NO	NO	NO	YES	YES	NO	NO	YES	116	69		125	45-54	33.2031
161	DAT	Male	NO	Kimbundu	Scondary education I cycle	NO	NO	NO	YES	NO	YES	YES	NO	NO	NO	YES	NO	YES	NO	NO	NO	104	86	97		15-24	15.6225
162	DAT	Female	NO	Kimbundu	Secondary education II cycle			YES	YES	NO	YES	NO	NO	YES	NO	NO	NO	NO	YES	NO	NO	151	78		102	25-34	22.151
163	DAT	Female	NO	Kimbundu	Illiterate	NO	No	YES	YES	NO	YES	YES	YES	YES	YES	YES	YES	YES	YES	YES	YES	120	80		120	55+	20.1348
164	DAT	Female	NO	Kimbundu	Illiterate	NO	No	NO	YES	NO	YES	YES	YES	YES	YES	YES	YES	YES	YES	YES	NO	130	88		161	55+	21.3593
165	DAT	Male	NO	Kimbundu	Secondary education II cycle	NO	No	NO	NO	NO	NO	NO	NO	NO	NO	NO	NO	NO	NO	NO		111	60		87	15-24	17.3191
166	HDP	Male	NO	Other	Secondary education II cycle	NO	No	YES	YES	NO	YES	YES	NO	YES	NO	NO	YES	NO	YES	YES	NO	135	81	133		15-24	16.6933
167	HDP	Female	NO	Bacongo	Illiterate	NO	No	NO	YES	NO	NO	NO	NO	NO	NO	NO	NO	NO	NO	YES	YES	161	117	106		55+	17.7734
168	HDP	Male	NO	Bacongo	Scondary education I cycle	NO	No	NO	YES	NO	YES	YES	NO	YES	NO	NO	NO	NO	YES	NO	NO	100	52	168		25-34	16.205
169	HDP	Male	NO	Kimbundu	Illiterate	NO	No	No	YES	NO	YES	YES	YES	YES	YES	YES	YES	YES	YES	YES	NO	86	62		104	45-54	13.8588
170	HDP	Female	NO	Kimbundu	Primary education	NO	NO	NO	YES	NO	YES	YES	NO	YES	NO	NO	NO	NO	YES	YES	NO	120	82	146		35-44	16.025
171	HDP	Male	NO	Kimbundu	Secondary education II cycle	NO	NO	NO	YES	NO	NO	YES	NO	YES	YES	NO	NO	NO	YES	NO	NO	121	80	89		15-24	17.3589
172	HDP	Male	NO	Kimbundu	Primary education	NO	NO	NO	YES	NO	NO	NO	NO	NO	YES	NO	NO	NO	YES	NO	NO	99	72	132		15-24	16.109
173	HDP	Female	NO	Bacongo	Scondary education I cycle	NO	NO	YES	YES	NO	YES	NO	YES	NO	YES	YES	YES	NO	NO	YES	NO	139	94		82	25-34	17.5771
174	HDP	Male	NO	Kimbundu	Scondary education I cycle	NO	NO	YES	NO	NO	NO	NO	NO	YES	NO	NO	NO	NO	NO	NO	NO	124	75		100	35-44	18.0848
175	HDP	Male	NO	Kimbundu	Scondary education I cycle	NO	No	NO	NO	NO	YES	YES	YES	YES	YES	YES	YES	NO	NO	YES	NO	122	80		82	25-34	14.3982
176	HDP	Male	NO	Kimbundu	Secondary education II cycle	NO	NO	NO	YES	NO	NO	NO	NO	YES	YES	YES	YES	YES	YES	YES	NO	92	57	129		35-44	17.9918
177	HDP	Female	NO	Kimbundu	Primary education	NO	NO	NO	YES	NO	YES	YES	NO	YES	YES	YES	YES	YES	YES	YES	YES	90	64	93		35-44	16.6944
178	HDP	Female	NO	Bacongo	Illiterate	NO	No	NO	YES	NO	NO	NO	NO	YES	YES	YES	YES	NO	YES	YES	YES	123	87	118		45-54	23.1247
179	HDP	Female																								35-44
180	HDP	Male	NO	Umbundo	Scondary education I cycle	YES	YES	YES	YES	NO	NO	NO	NO	YES	NO	NO	NO	NO	YES	NO	NO	92	56		85	15-24	17.0737
181	HDP	Male	NO	Umbundo	Secondary education II cycle	NO	NO	NO	YES	NO	NO	NO	NO	YES	NO	NO	YES	YES	YES	YES	NO	102	60	73		45-54	17.7778
182	HDP	Female	NO	Kimbundu	Primary education	NO	No	NO	YES	NO	NO	YES	NO	YES	NO	YES	NO	YES	YES	YES	NO	88	47	63		15-24	16.0081
183	HDP	Male	NO	Bacongo	Secondary education II cycle	NO	NO	YES	YES	NO	NO	NO	NO	YES	YES	NO	YES	YES	YES	YES	NO	124	76	138		35-44	19.5717
184	HDP	Male	NO	Kimbundu	Secondary education II cycle	NO	NO	NO	NO	NO	YES	YES	YES	YES	YES	YES	NO	NO	YES	YES	NO	109	76	165		15-24	20.2812
2637	Cacuaco	Male	NO	Umbundo	Secondary education II cycle	NO	Yes, sometimes	NO	NO	NO	YES	YES	YES	YES	YES	YES	YES	YES	YES	YES	YES	128	69		400	25-34	17.1655
186	HDP	Male	NO	Bacongo	Secondary education II cycle	NO	NO	NO	YES	NO	YES	NO	NO	NO	NO	NO	NO	YES	YES	NO	NO	61	45	104		15-24	15.8375
187	HDP	Female	NO	Kimbundu	Primary education	NO	NO	YES	YES	NO	NO	NO	NO	YES	YES	YES	YES	YES	YES	YES	YES	120	66		83	15-24	29.1358
188	HDP	Female	NO	Umbundo	Scondary education I cycle		No	No	YES	YES	NO	NO	YES	YES	YES	YES	YES	YES	YES	NO	YES	79	47	133		25-34	14.4194
189	HDP	Male	NO	Kimbundu	Primary education	NO	No	YES	YES	NO	NO	NO	NO	YES	YES	YES	YES	YES	YES	YES	NO	119	71	115		25-34
190	HDP	Female	NO	Kimbundu	Scondary education I cycle	NO	NO	YES	YES	NO	YES	NO	NO	YES	YES	NO	NO	NO	YES	YES	NO	61	40	154		25-34	15.6046
191	HDP	Male	NO	Kimbundu	Secondary education II cycle	NO	NO	YES	YES	NO	NO	NO	NO	YES	YES	NO	NO	YES	YES	YES	NO	62	41		89	35-44	18.5078
192	DAT	Male	NO	Kimbundu	Scondary education I cycle	NO	NO	YES	YES	NO	YES	YES	YES	YES	YES	YES	YES	YES	YES	YES	NO	128	84		100	45-54	33.8345
193	DAT	Male	NO	Kimbundu	Secondary education II cycle	NO	NO	YES	YES	NO	YES	YES	YES	YES	YES	YES	YES	YES	YES	YES	NO	131	86		79	35-44	19.8413
194	DAT	Female	NO	Kimbundu	Secondary education II cycle	NO	NO	YES	YES	YES	YES	YES	YES	NO	YES	YES	YES	YES	YES	YES	YES	137	71		87	25-34	33.834
195	DAT	Male	NO	Kimbundu	Scondary education I cycle	NO	NO	NO	YES	NO	YES	YES	NO	YES	YES	YES	YES	YES	YES	YES	NO	184	105		98	45-54	21.9364
196	DAT	Female	NO	Other	Illiterate	NO	No	NO	YES	NO	YES	YES	YES	YES	YES	YES	YES	YES	YES	YES	YES	159	108		104	55+	22.3674
197	DAT	Male	NO	Umbundo	Scondary education I cycle	NO	No	YES	YES	YES	YES	YES	YES	YES	YES	YES	YES	YES	YES	YES	YES	103	83	145		25-34	20.202
198	DAT	Male	NO	Umbundo	Primary education	YES	Yes, sometimes	NO	YES	NO	YES	YES	YES	YES	YES	YES	YES	YES	YES	YES	YES	140	79		96	35-44	16.609
199	DAT	Female		Kimbundu	Scondary education I cycle	NO	NO	NO	YES	NO	NO	NO	YES	NO	NO	YES	YES	NO	NO	YES	NO	133	78		80	45-54	26.2227
200	DAT	Female	NO	Umbundo	Primary education	NO	NO	YES	YES	NO	YES	NO	NO	YES	NO	NO	YES	YES	NO	YES	NO	118	75		98	25-34	27.1816
201	DAT	Female		Kimbundu	Primary education	NO	NO	NO	YES	NO	YES	NO	YES	NO	YES	YES	YES	YES	NO	NO	YES	143	85		91	35-44	45.1843
202	Cacuaco	Female	NO	Bacongo		NO	No	NO	YES	NO	YES	NO	NO	YES	NO	NO	YES	NO	NO	NO	YES	134	105		373	45-54	14.9116
203	DAT	Male	NO	Bacongo	University	NO	NO	YES	YES	NO	YES	YES	NO	NO	YES	YES	YES	NO	YES	YES	YES	124	59		89	15-24	21.5645
204	DAT	Male	NO	Bacongo	Secondary education II cycle	NO	NO	YES	YES	NO	NO	NO	NO	YES	YES	NO	YES	NO	NO	YES	NO	124	59		89	15-24	21.5645
205	DAT	Male	NO	Bacongo	University	NO	NO	NO	YES	NO	NO	YES	NO	NO	NO	NO	NO	YES	NO	NO	NO	122	80		80	15-24	20.5986
206	DAT	Female	NO	Kimbundu	Primary education	NO	NO		YES	NO	YES	NO	NO	NO	YES	YES	YES	YES	NO	NO	NO	125	83		123	25-34	17.5064
207	DAT	Female	NO	Kimbundu	Illiterate	YES	Yes, sometimes	NO	YES	YES	NO	NO	NO	NO	NO	NO	YES	NO	YES	NO	NO	140	100		103	55+	20.8117
208	DAT	Female	NO	Kimbundu	Illiterate	NO	NO	NO	YES	NO	NO	NO	YES	NO	YES	NO	NO	YES	NO	YES	NO	150	120		120	55+	30.4688
209	DAT	Male	NO	Kimbundu	Secondary education II cycle	YES	Yes, sometimes	NO	YES	NO	YES	NO	YES	NO	YES	NO	NO	YES	NO	NO	NO	140	110		98	55+	33.91
210	DAT	Male	NO	Kimbundu	Scondary education I cycle	NO	Yes, sometimes	NO	YES	YES	NO	NO	NO	YES	NO	YES	NO	YES	YES	YES	NO	130	90		83	25-34
212	DAT	Male		Kimbundu	Secondary education II cycle	NO	No	YES	YES	NO	NO	NO	NO	YES	YES	YES	YES	YES	NO	NO	NO	120	90		75	25-34	18.6851
213	DAT	Female		Kimbundu	Illiterate	NO	Yes, sometimes	NO	YES	NO	YES	YES	NO	NO	NO	YES	YES	YES	NO	NO	NO	115	83		98	55+	15.8079
214	DAT	Female	NO	Kimbundu	Secondary education II cycle	NO	Yes, sometimes	YES	YES	YES	YES	NO	NO	YES	NO	YES	NO	NO	NO	YES	NO	153	86	130		25-34	20.5761
215	HDP	Male	NO	Bacongo	Scondary education I cycle	NO	Yes, sometimes	YES	YES	NO	NO	NO	NO	YES	YES	YES	NO	YES	NO	YES	NO	90	54	99		25-34	17.5556
216	HDP	Male	NO	Kimbundu	Primary education	NO	NO	YES	YES	NO	NO	YES	NO	YES	NO	YES	YES	YES	YES	YES	NO	88	64		106	45-54	12.3274
217	HDP	Male	NO	Kimbundu	Primary education	NO	No	YES	YES	NO	YES	NO	YES	YES	NO	NO	NO	NO	NO	NO	NO	101	52		99	25-34	14.3997
218	HDP	Female	NO	Umbundo	Scondary education I cycle	NO	NO	NO	YES	NO	YES	YES	NO	YES	NO	YES	NO	NO	NO	YES	NO	86	55	114		35-44	14.1369
219	HDP	Male	NO	Bacongo	Secondary education II cycle	NO	NO	NO	YES	NO	YES	NO	YES	YES	YES	YES	NO	NO	NO	NO	NO	108	66	103		35-44	21.3593
220	HDP	Male	NO	Kimbundu	Scondary education I cycle	NO	NO	NO	YES	NO	NO	NO	NO	YES	NO	NO	YES	YES	NO	NO	NO	111	68	96		25-34	16.7493
221	HDP	Female	NO	Kimbundu	Illiterate	NO	NO	NO	YES	NO	NO	YES	NO	YES	YES	YES	YES	NO	NO	YES	NO	130	73	108		45-54	17.1447
222	HDP	Male	NO	Kimbundu	Scondary education I cycle	NO	NO	NO	YES	NO	YES	NO	YES	YES	YES	YES	YES	YES	YES	YES	NO	89	44	112		25-34	18.75
223	HDP	Male																								15-24
224	HDP	Male	NO	Kimbundu	Scondary education I cycle	NO	NO	NO	YES	NO	NO	NO	NO	YES	YES	NO	YES	YES	NO	YES	NO	140	69	103		15-24	18.1018
225	HDP	Male	NO	Kimbundu	Illiterate	NO	NO	NO	YES	NO	NO	NO	NO	NO	NO	YES	NO	NO	NO	NO	NO	131	79		133	25-34	21.5651
226	HDP	Male	YES	Other	Primary education	NO	NO	NO	YES	NO	YES	YES	NO	YES	NO	NO	YES	NO	YES	YES	NO	92	53	478		45-54	17.9581
227	HDP	Male	NO	Kimbundu	Scondary education I cycle	NO	Yes, sometimes	NO	YES	NO	YES	YES	NO	YES	NO	YES	YES	YES	YES	YES	NO	106	78		98	35-44	19.1942
228	HDP	Female	NO	Kimbundu	Primary education	NO	NO	NO	YES	NO	YES	YES	NO	YES	NO	YES	YES	NO	NO	YES	NO	112	50		82	25-34	14.2098
229	HDP	Male	NO	Kimbundu	Primary education	NO	No	NO	YES	NO	NO	NO	NO	YES	YES	YES	YES	NO	YES	YES	NO	84	53		103	45-54	16.7658
230	HDP	Male	NO	Bacongo	Primary education	NO	NO	NO	NO	NO	NO	NO	NO	YES	NO	NO	NO	NO	YES	NO	NO	151	81		83	55+	17.3737
231	HDP	Male	NO	Umbundo	Scondary education I cycle	NO	No	YES	YES	YES	NO	NO	NO	YES	YES	NO	NO	YES	NO	YES	NO	77	45	109		15-24	15.9675
232	Cariango	Male	NO		Scondary education I cycle	NO	No	NO	YES	YES	NO	NO	NO	YES	YES	YES	NO	NO	NO	NO	NO	112	70	91		15-24	19.0451
234	Cariango	Female	NO	Kimbundu	Illiterate	NO	NO	NO	YES	NO	YES	YES	YES	YES	YES	NO	NO	NO	NO	YES	NO	190	105		107	55+	20.2462
235	Cariango	Female	NO	Kimbundu	Primary education	YES	Yes, sometimes	YES	YES	YES	YES	YES	YES	YES	YES	YES	NO	NO	NO	YES	NO	155	99		102	55+	14.6051
236	Cariango	Male	NO	Kimbundu	Scondary education I cycle	NO	NO	NO	YES	NO	NO	NO	NO	YES	NO	YES	NO	NO	NO	NO	NO	119	75		84	15-24	18.5901
237	Cariango	Male	YES	Kimbundu	Secondary education II cycle	NO	No	NO	YES	NO	NO	YES	NO	YES	NO	NO	NO	NO	YES	NO	NO	127	89	70		15-24	15.8173
238	Cariango	Female	NO	Kimbundu	Illiterate	NO	No	YES	NO	NO	NO	YES	YES	YES	NO	YES	YES	YES	NO	YES	NO	166	92	112		45-54	19.052
239	Cariango	Female	NO	Bacongo	Primary education	NO	NO	NO	YES	NO	YES	YES	NO	YES	YES	YES	NO	NO	YES	YES	NO					15-24
240	Cariango	Female																								55+
241	Cariango	Female	NO	Kimbundu	Primary education	NO	NO	YES	YES	NO	NO	NO	NO	NO	YES	YES	NO	NO	NO	NO	NO	121	76	83		15-24	20.5457
242	Cariango	Female	NO	Umbundo	Primary education	NO	NO	NO	YES	NO	YES	YES	NO	NO	NO	YES	NO	NO	NO	YES	NO	114	66		72	15-24	20.5693
243	Cariango	Female	NO	Kimbundu	Secondary education II cycle	NO	NO	NO	YES	NO	YES	YES	NO	YES	NO	YES	YES	NO	YES	NO	NO	92	66	73		15-24	14.7379
244	Cariango	Female	NO	Kimbundu	Primary education	NO	NO	NO	YES	YES	NO	YES	YES	NO	YES	NO	NO	NO	YES	YES	NO	146	96		86	35-44	23.7253
245	Cariango	Female	NO	Kimbundu	Illiterate	NO	NO	YES	YES	YES	NO	NO	NO	NO	NO	YES	NO	NO	NO	NO	NO	137	81		109	55+	21.8314
246	Cariango	Female	NO	Kimbundu	Secondary education II cycle	NO	NO	NO	YES	NO	YES	YES	NO	YES	NO	YES	NO	NO	YES	YES	NO	92	66	146		15-24	18.026
247	Cariango	Female	NO	Kimbundu	Scondary education I cycle	NO	No	NO	YES	NO	NO	YES	NO	NO	NO	YES	NO	NO	NO	YES	NO	111	70	92		15-24	24.5779
248	Cariango	Female	NO	Kimbundu	Primary education	NO	No	YES	YES	NO	NO	NO	NO	NO	YES	YES	YES	NO	NO	NO	NO					35-44
249	Cariango	Female	NO	Kimbundu	Primary education	NO	NO	NO	YES	NO	YES	YES	NO	YES	NO	YES	NO	YES	NO	YES	NO	111	75	96		45-54	16.9812
250	Cariango	Male	NO	Kimbundu	Secondary education II cycle	NO	NO	NO	YES	NO	YES	YES	NO	NO	NO	YES	NO	NO	YES	YES	NO	83	50	102		25-34	15.3345
251	Cariango	Female	NO	Kimbundu	Scondary education I cycle	NO	NO	NO	YES	NO	YES	YES	YES	YES	YES	YES	YES	YES	YES	YES	NO	111	75	88		25-34	18.1787
252	Cariango	Male	NO	Kimbundu	Scondary education I cycle	YES	Yes, everyday	NO	YES	NO	YES	YES	YES	YES	YES	YES	NO	YES	YES	YES	YES	171	89		125	25-34	21.8871
253	Cariango	Male	NO	Kimbundu	Primary education	NO	No	No	YES	NO	NO	YES	NO	NO	NO	NO	YES	NO	NO	YES	NO	187	89		80	55+	24.281
254	Cariango	Male	NO		Primary education	NO	Yes, everyday	NO	YES	NO	YES	YES	YES	YES	NO	NO	NO	NO	YES	YES	NO	97	58	88		35-44	18.424
255	Cariango	Male	NO	Kimbundu	Scondary education I cycle	YES	Yes, everyday	NO	YES	NO	NO	YES	YES	YES	YES	YES	YES	YES	YES	YES	NO	102	64	78		35-44	14.881
256	Cariango	Female	NO	Kimbundu	Primary education	NO	No	No	YES	NO	NO	YES	NO	YES	YES	YES	NO	NO	YES	YES	YES	210	118	80		35-44	28.0402
257	Cariango	Female	NO	Kimbundu	Secondary education II cycle	NO	NO	NO	NO	NO	NO	YES	NO	YES	NO	YES	NO	NO	NO	YES	NO	126	83		79	15-24	19.0039
258	Cariango	Female	NO	Kimbundu	Scondary education I cycle	NO	NO	NO	NO	NO	NO	YES	NO	YES	NO	YES	NO	NO	YES	YES	NO	102	70		86	15-24	21.6413
260	Cariango	Female	NO	Kimbundu	Secondary education II cycle	NO	NO	YES	YES	NO	YES	NO	NO	YES	NO	YES	NO	NO	NO	NO	NO	112	75		91	25-34	17.9977
262	Cariango	Female	NO	Kimbundu	Scondary education I cycle	NO	NO	NO	YES	NO	NO	YES	YES	NO	YES	YES	YES	NO	YES	YES	NO	114	118		83	15-24	25.157
263	Cariango	Female	NO	Kimbundu		NO	NO	NO	YES	NO	NO	YES	NO	YES	NO	NO	NO	NO	YES	NO	NO	128	82		78	55+	17.3405
264	Cariango	Female	NO	Kimbundu	Primary education	NO	NO	NO	YES	YES	NO	YES	NO	YES	NO	YES	YES	YES	YES	YES	YES	189	126	96		45-54	21.875
265	Cariango	Female	NO	Bacongo	Primary education	NO	No	NO	YES	NO	YES	NO	YES	YES	NO	YES	NO	NO	NO	NO	NO	89	61		68	15-24	17.4638
266	Cariango	Female	NO	Kimbundu	Scondary education I cycle	NO	Yes, sometimes	NO	YES	NO	NO	NO	NO	NO	NO	YES	NO	NO	NO	NO	NO	150	104		90	25-34	31.8459
3028	Cacuaco	Male	NO	Kimbundu	Primary education	NO	Yes, sometimes	NO	YES	NO	NO	NO	NO	NO	NO	NO	NO	NO	NO	NO	NO	131	98		90	35-44	23.939
268	Cariango	Female	NO	Kimbundu	Primary education	NO	NO	NO	NO	NO	NO	YES	YES	YES	NO	YES	NO	NO	NO	NO	NO	146	105		98	15-24	19.2894
269	Cariango	Male	NO	Kimbundu	Secondary education II cycle	NO	No	YES	YES	NO	NO	YES	NO	YES	YES	NO	NO	NO	YES	NO	NO	129	76	154		15-24	16.5699
270	Cariango	Male	NO	Kimbundu	Secondary education II cycle	YES	Yes, everyday	NO	NO	NO	NO	NO	YES	NO	NO	NO	YES	NO	YES		NO	130	87	92		45-54	29.0124
271	Cariango	Female	NO	Kimbundu	Primary education	NO	Yes, everyday	NO	YES	NO	YES	YES	YES	YES	YES	YES	YES	YES	YES		NO	102	66	110		35-44	20.2694
272	Cariango	Female	NO	Other	Illiterate	NO	No	YES	NO	NO	NO	NO	YES	NO	YES	NO	NO	NO	NO	YES	YES	145	72	81		35-44	20.0778
273	Cariango	Female	NO	Other	Scondary education I cycle	NO	NO	NO	YES	NO	NO	YES	YES	YES	NO	YES	NO	NO	YES	YES	NO	117	77		86	15-24	18.8588
267	Cariango	Female	NO	Umbundo	Scondary education I cycle	NO	NO	NO	YES	NO	NO	YES	YES	YES	YES	YES	NO	YES	YES	YES	NO	122	64	109		15-24	18.7814
275	Cariango	Female	NO	Other	Illiterate	NO	NO	NO	YES	NO	NO	YES	YES	NO	NO	YES	YES	YES	YES		NO	185	106		100	55+	27.9807
276	Cariango	Female	NO	Other	Illiterate	NO	NO	YES	NO	YES	YES	NO	NO	NO	YES	NO	NO	YES	NO	NO	NO	137	82		78	55+	21.0772
277	Cariango	Female	YES	Kimbundu	Illiterate	NO	NO	NO	YES	NO	NO	NO	NO	NO	NO	YES	YES	NO	YES	NO	YES	180	82		94	45-54	25.7117
278	Cariango	Female	NO	Kimbundu	University	NO	NO	NO	YES	NO	NO	NO	YES	YES	YES	YES				YES	NO	133	86		82	15-24	15.9675
279	Cariango	Male	NO	Kimbundu	Secondary education II cycle	NO	Yes, sometimes	NO	YES	NO	YES	NO	NO	NO	YES	NO	NO	NO	YES	YES	NO	127	72		94	25-34	21.79
280	Cariango	Female	NO	Other	Illiterate	NO	NO	YES	YES	NO	YES	NO	YES	NO	yES	YES	YES	NO	YES	YES	YES	193	96		89	55+	26.5021
281	Cariango	Female	NO	Other	Scondary education I cycle	NO	No	YES	YES	NO	YES	NO	NO	NO	YES	YES	NO	NO	NO	YES	NO					35-44	19.6283
282	Cariango	Female	NO	Other	Primary education	NO	No	NO	YES	NO	YES	NO	YES	YES	NO	YES	NO	YES	YES	YES	NO	120	93	71		25-34	20.889
283	HDP	Female	NO	Umbundo	Scondary education I cycle	NO	No	NO	YES	NO	YES	YES	NO	YES	NO	YES	YES	NO	YES	YES	NO	106	70	70		25-34	24.7655
284	HDP	Male	YES	kimbundu	University	NO	NO	YES	YES	YES	NO	NO	YES	YES	YES	YES	YES	YES	YES	YES	NO	110	65		92	25-34	20.0146
285	HDP	Male	NO	Kimbundu	Secondary education II cycle	NO	NO	NO	YES	NO	YES	NO	NO	YES	NO	NO	YES	YES	YES	NO	NO	98	60	88		35-44	16.8994
286	HDP	Male	NO	Kimbundu	Primary education	NO	NO	NO	YES	NO	NO	YES	NO	YES	YES	YES	NO	YES	NO	YES	NO	90	60	113		45-54	13.5026
287	HDP	Male	NO	Bacongo	Scondary education I cycle	NO	No	YES	YES	NO	NO	NO	NO	YES	YES	YES	NO	NO	NO	NO	NO	108	71		80	35-44	15.6135
288	DAT	Male	NO	Kimbundu	Scondary education I cycle	NO	No	NO	YES	NO	YES	YES	YES	YES	YES	YES	YES	YES	YES	YES	NO	102	72		65	45-54
289	DAT	Female	NO	Umbundo	Scondary education I cycle	NO	NO	NO	YES	NO	YES	YES	YES	YES	YES	YES	YES	YES	YES	NO	NO	126	88		85	15-24	20.2395
290	DAT	Male		Umbundo	Primary education	YES	Yes, sometimes	NO	YES	NO	YES	YES	YES	YES	YES	YES	YES	YES	YES	YES	NO	120	80		93	45-54
291	DAT	Female		Kimbundu	Secondary education II cycle	NO	NO	YES	YES	NO	YES	YES	YES	YES	YES	YES	YES	YES	YES	YES	NO	117	81		85	15-24	20.9275
292	DAT	Female	NO	Other	Scondary education I cycle	NO	NO	YES	YES	YES	YES	YES	YES	YES	YES	YES	YES	YES	YES	YES	NO				94	15-24	13.5589
293	DAT	Female	NO	Kimbundu	Secondary education II cycle	NO	NO	NO	YES	NO	YES	YES	NO	YES	YES	NO	NO	YES	YES	YES	NO	128	84		120	35-44	17.5056
294	DAT	Male	NO	Kimbundu	Secondary education II cycle	NO	Yes, sometimes	NO	YES	NO	YES	YES	NO	YES	NO	YES	NO	YES	NO	YES	NO	167	106	100		35-44	24.1633
295	DAT	Female	NO	Kimbundu	Scondary education I cycle	NO	Yes, sometimes	YES	NO	NO	NO	YES	YES	YES	NO	YES	NO	NO	NO	YES	NO	95	43	100		25-34	15.5976
296	DAT	Female	NO	Kimbundu	Scondary education I cycle	NO	NO	NO	YES	NO	YES	NO	YES	NO	NO	YES	YES	YES	NO	NO	NO	105	52	99		15-24	23.1111
297	DAT	Female	NO	Kimbundu	Secondary education II cycle	NO	No	NO	YES	NO	NO	YES	NO	YES	YES	NO		NO	NO	YES	NO	107	62	105		15-24	21.4109
298	DAT	Male	YES	Kimbundu	Scondary education I cycle	NO	No	NO	YES	YES	YES	NO	NO	NO	YES	NO	NO	YES	NO	YES	NO	105	69	102		25-34	17.6327
299	Cariango	Female	NO	Other	Scondary education I cycle	NO	NO	NO	YES	NO	NO	YES	NO	YES	NO	YES	NO	NO	YES	YES	NO		66	90		15-24	18.2563
300	Cariango	Female	NO	Kimbundu	Primary education	NO	NO	NO	YES	NO	NO	NO	NO	NO	NO	NO	YES	YES	NO	NO	NO	120	93	107		35-44	23.815
301	Cariango	Male		Kimbundu	Scondary education I cycle	NO	Yes, sometimes	YES	YES	NO	NO	YES	NO	YES	NO	YES	NO	NO	NO	YES	NO	106	70		112	25-34	21.6128
302	Cariango	Male	NO	Kimbundu	Secondary education II cycle	NO	No	NO	YES	YES	YES	YES	YES	YES	YES	YES	YES	NO	YES	YES	NO	106	64	88		15-24	18.937
303	Cariango	Male	NO	Kimbundu	Secondary education II cycle	NO	Yes, sometimes	No	YES	NO	NO	YES	NO	YES	NO	YES	NO	NO	NO	NO	NO	124	70		66	15-24	19.487
304	Cariango	Female	NO	Other	Secondary education II cycle	NO	No	NO	YES	NO	YES	NO	NO	NO	NO	YES	NO	NO	NO	NO	NO	127	66	79		25-34	24.7307
305	Cariango	Female	NO		Scondary education I cycle	NO	No	NO	YES	NO	YES	YES	YES	YES	YES	YES	NO	NO	NO	YES	NO	111	75	85		25-34	18.0737
306	Cariango	Female	NO	Kimbundu	Primary education	NO	Yes, sometimes	YES	YES	NO	NO	YES	NO	YES	NO	YES	NO	YES	YES	YES	NO	105	75		83	35-44	18.5178
307	Cariango	Female	NO	Kimbundu	Primary education	NO	Yes, sometimes	NO	YES	NO	YES	NO	NO	YES	YES	YES	NO	NO	YES	NO		128	51		82	35-44	24.9108
308	HDP	Male	NO	Bacongo	Secondary education II cycle		NO	NO	YES	NO	YES	YES	YES	YES	NO	NO	NO	NO	YES	YES	NO	104	60		84	15-24	17.5383
309	HDP	Female	NO	Kimbundu	Secondary education II cycle	NO	NO	NO	YES	NO	YES	YES	NO	YES	YES	YES	NO	NO	YES	YES	NO	111	64		69	15-24	18.8649
310	HDP	Male	NO	Bacongo	Scondary education I cycle	NO	NO	No	YES	NO	YES	NO	NO	YES	NO	NO	NO	YES	YES	YES	NO	88	55	99		15-24	17.07
311	DAT	Male	NO	Kimbundu	Secondary education II cycle	YES	Yes, sometimes	YES	YES	NO	NO	YES	NO	NO	NO	NO	NO	NO	NO	NO	NO	205	155		111	45-54	24.6559
312	DAT	Male	NO	Umbundo	Scondary education I cycle	YES	NO	NO	NO	NO	YES	NO	NO	YES	NO	NO	NO	NO	NO	NO	NO	102	60		111	35-44	27.4756
313	DAT	Female	NO	Kimbundu	Primary education	NO	NO	NO	YES		YES			YES	YES	YES	YES	NO	YES	YES	NO	124	92		122	45-54	23.1911
314	DAT	Male	NO	Kimbundu	Secondary education II cycle	NO	NO	NO	NO	NO	NO	NO	NO	NO	NO	NO	NO	NO	NO	NO	NO	95	60		111	55+	20.4491
315	DAT	Male	NO	Bacongo	Secondary education II cycle	YES	Yes, sometimes	NO	YES	NO	YES	NO	YES	NO	NO	YES	NO	YES	NO	NO	NO	116	77	79		25-34	20.0692
316	DAT	Male	YES	Other	Secondary education II cycle	NO	NO	NO	YES	NO	YES	YES	NO	YES	NO	YES	NO	YES	NO	NO	NO	132	94		152	35-44	25.2595
317	DAT	Male	NO	Kimbundu	Scondary education I cycle	NO	NO	NO	YES	NO	NO	NO	NO	NO	NO	NO	NO	NO	NO	NO	NO	141	82	142		25-34	20.5191
318	DAT	Male		Kimbundu	Scondary education I cycle	NO	NO	YES	YES	NO	YES	NO	NO	NO	NO	NO	NO	NO	NO	NO	NO	133	54	304		25-34	23.3067
319	DAT	Male	NO	Kimbundu		NO		YES	YES	NO	NO	NO	NO	YES	NO	NO	NO	NO	NO	NO	NO	117	73		111	25-34	23.3564
320	DAT	Female	NO	Kimbundu	Scondary education I cycle	NO	No	NO	NO	NO	YES	NO	NO	nO	NO	NO	NO	NO	NO	NO	NO	107	67		85	15-24
321	DAT	Female	NO		Scondary education I cycle	NO	No	NO			YES	NO	NO	NO	NO	NO	NO	NO	NO	NO	NO	90	41		90	15-24
322	DAT	Female	NO	Kimbundu	Scondary education I cycle			YES	YES	NO	YES	NO	NO	NO	NO	NO	NO	NO	NO	NO	NO	101	71		119	25-34	17.2111
323	DAT	Male	NO	Kimbundu	Secondary education II cycle			NO	YES	NO	NO	NO	NO	NO	NO	NO					NO			87		15-24
324	DAT	Female		Kimbundu	Scondary education I cycle	NO	No	NO	YES	NO	YES	NO	YES	NO	NO	YES	YES	YES	NO	NO	NO	107	56		101	15-24	17.7459
325	DAT	Female	NO	Umbundo	Primary education	NO	Yes, sometimes	NO	YES	NO	NO	NO	NO	YES	NO	YES	NO	YES	NO	YES	NO	112	72		82	15-24	24.6097
326	DAT	Female	NO	Kimbundu	Scondary education I cycle	NO	NO	YES	yES	NO	yES	NO	NO	NO	NO	NO	YES	NO	NO	YES	NO	113	70		97	25-34	20.9321
327	DAT	Male	NO	Kimbundu	Secondary education II cycle	NO	NO	NO	NO	NO	NO	NO	NO	NO	NO	NO	NO	NO	NO	NO	NO	131	66		53	15-24	22.3094
328	DAT	Female	NO	Kimbundu	Scondary education I cycle	NO	NO	NO	YES	NO	YES	YES	NO	NO	NO	YES	NO	NO	NO	YES	NO	122	76		103	45-54	13.67
329	DAT	Female	NO	Kimbundu	Scondary education I cycle	NO	NO	YES	YES	NO	YES	NO	NO	NO	NO	NO	NO	NO	NO	NO	NO	99	62	96		35-44
330	DAT	Male	NO	kimbundu	Scondary education I cycle	NO	NO	YES	NO	NO	YES	NO	NO	NO	NO	NO	NO	NO	NO	NO	NO	90	59		114	25-34	12.6543
331	DAT	Male	NO	kimbundu	Scondary education I cycle	NO	No	YES	YES	NO	NO	YES	NO	YES	NO	NO	NO	NO	NO	NO	NO	107	78		109	25-34	18.0662
332	DAT	Female	NO	kimbundu	Scondary education I cycle	NO	No	NO	NO	NO	NO	NO	NO	NO	NO	NO	NO	NO	NO	NO	NO	94	53		99	25-34	23.9796
333	DAT	Male	NO	Umbundo	Scondary education I cycle	NO	Yes, sometimes	YES	YES	NO	YES	NO	NO	NO	NO	NO	NO	NO	NO	NO	NO	117	77	108		25-34	18.1787
334	DAT	Male	NO	Kimbundu	Scondary education I cycle	NO	No	NO	YES	NO	YES	YES	YES	YES	YES	YES	NO	NO	NO	YES	YES	113	68		79	25-34	18.3817
335	DAT	Female	NO	Bacongo	Primary education	NO	No		YES	NO	YES	YES	YES	YES	YES	YES	YES	YES	YES	YES	NO	120	75	98		25-34	19.7777
336	DAT	Female	NO	Umbundo	Primary education	NO	NO	NO	YES	NO	YES	YES	YES	YES	YES	YES	YES	YES	YES	YES	NO	99	63		94	45-54	54.345
337	DAT	Female		Kimbundu	Primary education	NO	No	NO	YES	NO	YES	NO	YES	YES	YES	YES	YES	YES	YES	YES	NO	136	80		108	25-34	33.6728
338	DAT	Male	NO	Umbundo	Primary education	NO	No	NO	YES	NO	YES	YES	YES	YES	YES	YES	YES	YES	YES	YES	NO	135	64		174	55+	18.8189
339	DAT	Male	NO	Kimbundu	Primary education	NO	NO	YES	YES	NO	YES	YES	YES	YES	YES	YES	YES	YES	YES	YES	NO			160		35-44	14.7011
340	DAT	Male	NO	Bacongo	Primary education	NO	No	NO	YES	NO	YES	YES	YES	YES	YES	YES	YES	YES	YES	YES	NO	97	56	144		15-24	19.7779
341	DAT	Male	NO	Umbundo	Primary education	NO	No	YES	YES	NO	YES	YES	YES	YES	YES	NO	YES	YES	YES	YES	NO	106	72		125	55+	14.3552
342	DAT	Male	NO	Umbundo	Scondary education I cycle	NO	No	NO	YES	YES	YES	YES	YES	YES	YES	YES	YES	YES	YES	YES	NO	109	74	157		35-44	49.046
343	DAT	Male	NO	Kimbundu		NO	NO	NO	YES	NO	YES	YES	YES	YES	YES	YES	YES	YES	YES	YES	NO	137	81		101	55+	37.5
344	DAT	Female	NO	Kimbundu	Scondary education I cycle	NO	NO	YES	YES	NO	YES	YES	YES	YES	YES	YES	YES	YES	YES	YES	NO	107	65	108		35-44	17.1468
345	DAT	Female	NO	Umbundo	Scondary education I cycle	NO	NO	YES	YES	NO	YES	YES	YES	YES	YES	YES	YES	YES	YES	YES	NO	115	85		118	45-54	16.5606
346	DAT	Male	NO	Kimbundu	Secondary education II cycle	NO	Yes, sometimes	NO	YES	YES	YES	YES	YES	NO	YES	YES	YES	YES	YES	YES	NO	171	98	166		45-54	22.8788
347	HDP	Male	NO	Bacongo	Secondary education II cycle	NO	No	NO	YES	NO	NO	NO	NO	NO	YES	YES	NO	YES	YES	YES	YES	98	62	103	103	45-54	18.3391
348	HDP	Male	NO	Kimbundu	Secondary education II cycle	NO	No	NO	YES	NO	NO	NO	NO	YES	NO	YES	YES	NO	NO	NO	NO	87	65	117		35-44	14.8729
349	HDP	Female	NO	Other	Scondary education I cycle	NO	NO	YES	YES	NO	NO	YES	NO	YES	NO	NO	YES	NO	NO	NO	NO	81	52	107	81	25-34	14.8789
350	HDP	Male	NO	Bacongo	Secondary education II cycle	NO	NO	NO	YES	NO	NO	NO	NO	YES	YES	YES	YES	NO	YES	NO	NO	87	53	78		55+	19.4444
351	HDP	Male																								45-54
352	HDP	Female	YES	Kimbundu	Scondary education I cycle	NO	No	NO	YES	NO	NO	NO	NO	YES	YES	YES	NO	YES	YES	YES	NO	113	66		70	25-34	19.7711
353	HDP	Male	NO	Kimbundu	Illiterate	NO	No	NO	YES	NO	NO	YES	NO	YES	NO	YES	NO	NO	NO	NO	NO	101	61		70	15-24	15.4183
354	HDP	Male	NO	Kimbundu	Scondary education I cycle	NO	No	NO	YES	NO	NO	NO	NO	YES	YES	YES	NO	NO	NO	NO	NO	113	70	94		35-44	20.4467
355	HDP	Male	NO	Kimbundu	Secondary education II cycle	NO	No	YES	YES	NO	NO	NO	NO	YES	NO	YES	YES	YES	NO	NO	NO	100	75	110		35-44	17.6471
356	HDP	Male	NO	Kimbundu	Secondary education II cycle	NO	No	NO	YES	NO	YES	NO	NO	YES	YES	YES	NO	YES	YES	YES	NO	109	73	101		25-34	18.8272
357	HDP	Male	NO	Umbundo	Secondary education II cycle	NO	No	NO	NO	NO	NO	NO	NO	YES	YES	NO	YES	NO	YES	NO	NO	106	68	93		35-44	14.1184
358	HDP	Male	NO	Other	Primary education	NO	No	NO	YES	NO	YES	NO	NO	YES	YES	YES	YES	YES	YES	NO	NO	90	55		102	25-34	16.5672
359	HDP	Male	NO	Bacongo	Scondary education I cycle	NO	No	YES	YES	NO	YES	YES	YES	YES	YES	NO	NO	NO	NO	YES	NO	91	58	86		15-24	16.2543
360	HDP	Male	NO	Umbundo	Primary education	NO	NO	YES	YES	NO	NO	YES	NO	YES	NO	YES	NO	YES	YES	YES	NO	138	83	92		35-44	22.835
361	HDP	Female	NO	Umbundo	Secondary education II cycle	NO	NO	YES	YES	YES	YES	YES	YES	YES	YES	YES	NO	NO	YES	YES	NO	82	51		72	15-24	16.5606
362	HDP	Male	NO	Kimbundu	Secondary education II cycle	NO	Yes, everyday	YES	YES	NO	YES	NO	NO	YES	NO	NO	NO	NO	NO	NO	NO	97	63	129		15-24	16.7901
363	HDP	Male	NO	Kimbundu	Secondary education II cycle	NO	No	YES	YES	NO	NO	NO	NO	YES	YES	YES	NO	NO	YES	YES	NO	123	70		92	25-34	17.5056
364	HDP	Female		Kimbundu	Illiterate	NO	NO	NO	YES	NO	NO	NO	NO	YES	YES	YES	NO	NO	YES	YES	NO	106	50	111		35-44	17.2421
365	Cacuaco	Male	YES	Kimbundu	Scondary education I cycle	NO	No	NO	YES	NO	NO	YES	NO	YES	YES	YES	NO	NO	NO	YES	NO	93	73		387	35-44	17.396
366	Cacuaco	Male	NO	Bacongo	Secondary education II cycle	NO	NO	YES	NO	NO	NO	YES	YES	YES	NO	NO	NO	NO	NO	YES	NO	93	68		86	25-34	23.0546
367	Cacuaco	Female	NO	Umbundo	Illiterate	NO	NO	NO	NO	NO	YES	YES	YES	YES	NO	NO	NO	NO	NO	YES	NO	129	86		83	55+	18.2222
368	Cacuaco	Male	NO	Kimbundu	Primary education	NO	Yes, sometimes	NO	YES	NO	NO	YES	YES	YES	YES	NO	NO	NO	NO	YES	YES	106	77		131	45-54	15.6225
369	Cacuaco	Male	NO	Bacongo	Scondary education I cycle		Yes, sometimes	NO	YES	NO	YES	NO	NO	YES	YES	NO	NO	NO	NO	YES	NO	142	85		160	45-54	15.4056
370	Cacuaco	Female	NO	Kimbundu	Primary education	NO	No	NO	YES	NO	YES	YES	NO	YES	NO	NO	NO	NO	NO	YES	NO	107	70	145		15-24
371	Cacuaco	Female	NO	Bacongo	Primary education	NO	Yes, sometimes	NO	YES	NO	YES	YES	YES	YES	YES	YES	NO	NO	NO	YES	NO	118	78		243	25-34	19.0443
372	Cacuaco	Male	NO	Umbundo	Primary education	NO	No	NO	YES	YES	YES	YES	YES	YES	YES	YES	NO	NO	NO	YES	NO	104	67		92	25-34
373	Cacuaco	Male	NO	Umbundo	Secondary education II cycle	NO	No	NO	YES	YES	NO	NO	YES	YES	YES	YES	NO	NO	NO	YES	NO	145	85	93		15-24	15.3697
374	Cacuaco	Male	NO	Umbundo	Primary education	NO	Yes, sometimes	NO	YES	NO	NO	NO	NO	YES	NO	NO	NO	NO	NO	NO	NO	107	69		85	15-24	15.5864
375	Cacuaco	Female	NO	Kimbundu	Scondary education I cycle	NO	Yes, sometimes	NO	NO	NO	NO	NO	NO	NO	NO	YES	NO	NO	NO	NO	NO	133	82		95	25-34	22.151
376	Cacuaco	Female	NO	Umbundo	Primary education	NO	NO	NO	yES	NO	yES	YES	YES	YES	YES	YES	NO	NO	NO	YES	NO	89	53	128		15-24	16.9747
377	Cacuaco	Male	NO	Bacongo	Secondary education II cycle	NO	NO	NO	YES	NO	NO	NO	NO	YES	NO	YES	NO	NO	NO	YES	NO	116	67		97	15-24	15.4124
378	Cacuaco	Male	NO	Bacongo	Primary education	YES	Yes, sometimes	NO	YES	NO	YES	YES	YES	YES	YES	NO	NO	NO	NO	NO	NO	91	66		325	25-34	15.943
379	Cacuaco	Male	NO	Bacongo	Secondary education II cycle	NO	Yes, sometimes	YES	YES	NO	YES	YES	YES	YES	YES	YES	NO	YES	NO	YES	NO	114	58	77		15-24	15.4652
380	Cacuaco	Female	NO	kimbundu	Primary education	NO	No	NO	NO	NO	NO	NO	NO	NO	YES	YES	NO	NO	NO	YES	NO	85	58		124	35-44	19.052
381	Cacuaco	Male	NO	kimbundu	Scondary education I cycle	NO	Yes, sometimes	NO	YES	NO	NO	YES	NO	NO	NO	NO	NO	NO	NO	NO	NO	111	74		99	25-34	15.2417
382	Cacuaco	Male	NO	Bacongo	Secondary education II cycle	NO	Yes, sometimes	NO	NO	NO	NO	NO	NO	NO	NO	NO	NO	NO	NO	NO	NO	97	65		110	45-54	18.8246
383	Cacuaco	Male	NO	Umbundo	Scondary education I cycle	NO	Yes, sometimes	NO	YES	YES	YES	YES	YES	NO	YES	YES	NO	NO	NO	NO	NO	131	87		78	25-34	17.1429
384	Cacuaco	Male	YES	Kimbundu	Scondary education I cycle		Yes, sometimes	NO	YES	NO	NO	NO	NO	YES	NO	NO	NO	YES	NO	NO	NO	119	83	275		35-44	19.052
385	Cacuaco	Male	NO	Umbundo	Primary education	NO	No	YES	NO	NO	NO	NO	YES	NO	NO	NO	NO	NO	NO	NO	NO	107	80	117		45-54	18.0671
386	Cacuaco	Female	NO	Other	Primary education	NO	NO	YES	NO	NO	YES	NO	YES	NO	NO	NO	NO	NO	YES	YES	NO	117	74		89	15-24	19.1016
387	Cacuaco	Male	YES	Kimbundu	Secondary education II cycle		No	YES	YES	NO	NO	NO	NO	NO	NO	NO	NO	NO	NO	NO	NO	138	73	112		45-54	20.9343
388	Cacuaco	Female	NO	Other	Secondary education II cycle	NO	No	NO	NO	NO	NO	YES	NO	NO	YES	NO	NO	NO	NO	YES	NO	190	120		96	15-24	15.6573
389	Cacuaco	Male	NO	Umbundo	Primary education	NO	NO	YES	YES	NO	YES	NO	YES	NO	NO	YES	NO	NO	NO	YES	NO	84	61	112		35-44	14.0214
390	Cacuaco	Female	NO	Umbundo	Secondary education II cycle	NO	No	NO	YES	NO	NO	NO	NO	NO	YES	YES	NO	NO	YES	NO	YES	120	72	96		25-34	22.2063
391	Cacuaco	Male	NO	Other	Scondary education I cycle	NO	No	NO	YES	NO	NO	YES	NO	YES	YES	NO	YES	YES	YES	YES	NO	101	69	97		15-24	16.7657
392	Cacuaco	Male	NO	Umbundo	Primary education	NO	No	NO	YES	NO	NO	YES	YES	NO	NO	YES	NO	NO	NO	NO	NO	97	56	98		25-34	18.6328
393	Cacuaco	Female	NO	Kimbundu	Illiterate	NO	NO	NO	YES	NO	NO	YES	YES	YES	YES	NO	NO	NO	NO	NO	YES	97	56		98	25-34	14.1994
394	Cacuaco	Female	NO	Umbundo		NO	NO	NO	YES	YES	YES	YES	YES	YES	YES	YES	NO	NO	NO	NO	YES	85	53	106		55+	17.6693
395	DAT	Female	NO	Other	Scondary education I cycle	NO	NO	NO	YES	YES	YES	YES	YES	YES	YES	YES	YES	YES	YES	YES	NO	99	70	121		15-24	15.9875
396	DAT	Female	NO	Other	Secondary education II cycle	NO	No	NO	YES	NO	YES	YES	YES	YES	YES	YES	YES	YES	YES	YES	NO	150	106		79	35-44	25.2994
397	DAT	Female	NO	Kimbundu	Primary education	NO	No	YES	NO	YES	YES	YES	YES	YES	YES	YES	YES	YES	YES	YES	NO	141	89	135		35-44	18.9291
398	DAT	Male		Umbundo	University	NO	No	NO	YES	NO	YES	YES	YES	YES	YES	YES	YES	YES	YES	YES	NO	101	66	80		25-34	18.8121
399	DAT	Male		Other	Secondary education II cycle	NO	NO	NO	YES	NO	YES	YES	YES	YES	YES	YES	YES	YES	YES	YES	NO	101	66	130		35-44	19.7232
400	DAT	Male	NO	Umbundo	Secondary education II cycle	NO	NO	NO	YES	YES	YES	YES	YES	YES	YES	YES	YES	YES	YES	YES	YES	104	75	76		15-24	16.9747
401	DAT	Male	NO		Primary education	NO	No	NO	YES	NO	YES	YES	YES	YES	YES	YES	YES	YES	YES	YES	NO	86	49	96		55+	17.7086
402	DAT	Male	YES	Umbundo	Primary education	NO	No	YES	YES	NO	YES	YES	YES	YES	YES	YES	YES	YES	YES	YES	NO	142	90		210	45-54	27.7767
403	DAT	Male	NO	Umbundo	Scondary education I cycle	NO	No	NO	YES	NO	YES	NO	NO	NO	NO	NO	NO	NO	NO	NO	NO	106	67	96		35-44	20.061
404	DAT	Female	NO	Kimbundu	Scondary education I cycle	NO	No	YES	YES	NO	YES	NO	NO	NO	NO	NO	NO	NO	NO	NO	YES	143	92		89	35-44
405	DAT	Male		Kimbundu	Scondary education I cycle	NO	No	NO	YES	NO	YES	NO	YES	NO	NO	YES	YES	NO	NO	NO	YES	109	72		148	55+	20.8889
406	DAT	Female	NO	Kimbundu	Secondary education II cycle	NO	No	NO	YES	YES	YES	NO	NO	YES	YES	YES	NO	NO	NO	NO	NO	100	70		75	15-24	17.9688
407	DAT	Female	NO	Kimbundu	Illiterate	NO	No	NO	NO	YES	YES	YES	NO	NO	YES	YES	NO	YES	NO	YES	NO	99	56		95	15-24	21.3593
408	DAT	Male	NO	Kimbundu	Illiterate	NO	Yes, sometimes	YES	YES	NO	YES	NO	YES	NO	NO	YES	YES	YES	NO	YES	NO	130	71		84	15-24	14.9808
409	DAT	Male	NO	Kimbundu	Secondary education II cycle	NO	Yes, sometimes	YES	YES	YES	YES	NO	NO	YES	YES	NO	YES	YES	NO	YES	NO	99	62		80	15-24	20.1772
410	DAT	Male	NO	Kimbundu	Secondary education II cycle	NO	Yes, sometimes	NO	YES	YES	YES	NO	NO	NO	YES	YES	NO	NO	NO	YES	NO	118	69		69	15-24	19.4932
411	DAT	Male	NO	Kimbundu	Secondary education II cycle	NO	Yes, sometimes	NO	YES	NO	YES	YES	NO	NO	YES	NO	YES	NO	NO	NO	NO	90	64	112		55+	24.1672
412	DAT	Male	NO	Kimbundu	Scondary education I cycle	NO	No	NO	YES	NO	NO	NO	NO	YES	NO	NO	NO	NO	NO	NO	NO	90	60		82	15-24	19.1512
413	DAT	Female		Kimbundu	University	NO	No	YES	NO	NO	NO	NO	NO	NO	NO	NO	NO	NO	NO	NO	NO	99	60		82	15-24	20
414	DAT	Male	NO	Other	Scondary education I cycle	NO	NO	NO	YES	NO	YES	NO	NO	NO	NO	NO	NO	NO	NO	YES	NO	93	66		105	45-54	19.6052
415	DAT	Female	NO	Kimbundu	Secondary education II cycle	NO	No	YES	YES	NO	NO	NO	NO	NO	NO	NO	NO	NO	NO	YES	NO	115	50		78	25-34	20.6612
416	DAT	Female	NO	Kimbundu	Scondary education I cycle	NO	NO	NO	YES	NO	YES	NO	NO	NO	NO	NO	NO	NO	NO	YES	YES	211	100		86	55+	24.0346
417	DAT	Female	NO	Kimbundu	Scondary education I cycle	NO	No	NO	YES	NO	NO	NO	NO	YES	NO	YES	NO	YES	YES	YES	NO	142	49		94	35-44
418	DAT	Male	NO	Kimbundu	Scondary education I cycle	NO	No	NO	YES	NO	YES	NO	NO	YES	YES	YES	YES	YES	NO	YES	NO	79	46		89	15-24	18.1252
419	DAT	Female	YES	Kimbundu	Secondary education II cycle	NO	No	YES	YES	NO	YES	NO	NO	NO	NO	NO	NO	NO	NO	NO	NO	152	83	353		45-54
420	DAT	Female	NO		Scondary education I cycle	NO	No	NO	NO	NO	NO	NO	NO	NO	NO	NO	NO	NO	NO	NO	NO	108	63		67	25-34	18.9069
421	DAT	Male	NO	Kimbundu	Secondary education II cycle	NO	No	NO	YES	NO	YES	YES	YES	YES	NO	YES	YES	YES	YES	YES	NO	128	63		87	25-34	22.4914
422	DAT	Male		Bacongo	Primary education	NO	Yes, sometimes	YES	YES	NO	YES	YES	NO	YES	YES	YES	NO	YES	YES	YES	NO	91	59		93	25-34	19.5717
423	DAT	Female	NO	Umbundo	Scondary education I cycle	NO	No	NO	YES	NO	NO	NO	NO	NO	NO	NO	NO	NO	NO	NO	NO	127	95		51	35-44	21.2306
424	DAT	Female	YES	Bacongo	Scondary education I cycle	NO	NO	NO	YES	YES	yES	YES	YES	YES	YES	YES	YES	YES	NO	YES	NO	137	78		80	55+	34.7656
425	DAT	Female	NO	Kimbundu	Scondary education I cycle	NO	NO	NO	yES	NO	yES	YES	NO	YES	YES	NO	YES	YES	YES	YES	NO	116	80		312	45-54	26.8977
426	DAT	Male	NO	kimbundu	Scondary education I cycle	YES	Yes, sometimes	NO	yES	NO	yES	NO	YES	YES	YES	YES	YES	YES	NO	YES	NO	148	119		78	35-44	20.1092
274	Cariango	Female	NO	Kimbundu	Secondary education II cycle	NO	No	NO	YES	YES	YES	NO	NO	YES	NO	YES	YES	YES	NO		NO	105	67		73	15-24	23.589
428	DAT	Male	NO	kimbundu	Scondary education I cycle	NO	No	NO	YES	NO	YES	NO	NO	NO	NO	NO	NO	NO	NO	NO	NO	116	72		97	35-44	20.4783
429	DAT	Female	NO	kimbundu	Scondary education I cycle	NO	No	YES	YES	NO	YES	NO	NO	NO	NO	NO	NO	NO	NO	NO	NO	126	71		102	55+	22.2222
430	DAT	Female	NO	kimbundu	Secondary education II cycle	NO	No	NO	YES	NO	NO	NO	NO	NO	YES	YES	NO	NO	NO	YES	NO	180	80		101	15-24	21.048
431	DAT	Female	NO	kimbundu	Illiterate	NO	No	NO	YES	NO	YES	NO	NO	NO	YES	YES	YES	YES	NO	NO	NO	132	77		87	55+	17.7459
432	DAT	Male	NO	Kimbundu		NO	No	NO	YES	NO	YES	NO	NO	NO	NO	NO	NO	NO	NO	NO	NO	122	95	90		25-34	19.5717
433	DAT	Male	NO	Kimbundu	Scondary education I cycle	NO	No	NO	YES	NO	YES	YES	NO	YES	YES	YES	YES	NO	YES	NO	NO	123	94		96	25-34	13.9799
434	HDP	Male	NO	Kimbundu	Scondary education I cycle	NO	No	YES	YES	NO	YES	NO	NO	YES	YES	YES	NO	YES	NO	NO	YES	108	56	129		35-44	16.5023
435	HDP	Male	NO	Kimbundu	Scondary education I cycle	NO	No	NO	YES	NO	YES	YES	NO	NO	YES	NO	NO	NO	YES	YES	NO	97	62		75	35-44	15.151
436	HDP	Female	NO	Bacongo	Illiterate	NO	NO	YES	NO	NO	NO	YES	YES	YES	YES	YES	NO	NO	NO	NO	NO	92	55		71	25-34	24.977
437	HDP	Male	NO	Bacongo	Primary education	NO	No	NO	YES	NO	NO	NO	NO	YES	YES	YES	YES	YES	YES	YES	NO	107	56		151	15-24	17.8547
438	HDP	Male	NO	Umbundo	Primary education	NO	No	NO	YES	NO	NO	NO	YES	YES	YES	YES	YES	YES	YES	YES	NO	90	55		129	35-44	20.3074
439	HDP	Male	NO	Other	Secondary education II cycle	NO	NO	NO	YES	YES	YES	YES	YES	YES	YES	YES	NO	NO	NO	YES	NO	122	72	90		35-44	20.3488
440	HDP	Female	NO	Other	Scondary education I cycle	NO	Yes, sometimes	NO	YES	NO	YES	YES	NO	YES	YES	NO	NO	NO	NO	NO	NO	95	70	106		15-24
441	HDP	Male	NO	Other	Scondary education I cycle	NO	No	YES	NO	YES	YES	NO	YES	NO	YES	YES	NO	NO	YES	YES	NO	114	72			25-34	18.6966
442	HDP	Female	NO	Other	Scondary education I cycle	NO	No	NO	YES	NO	YES	NO	NO	YES	NO	YES	NO	NO	NO	NO	NO	91	61	123		35-44	22.2975
443	HDP	Female	NO	Kimbundu	Illiterate	NO	NO	NO	YES	YES	YES	YES	NO	YES	YES	YES	NO	NO	YES	YES	NO	90	55		81	25-34	18.4425
445	Cariango	Female	NO	Kimbundu	Illiterate	NO	No	NO	YES	NO	YES	NO	YES	NO	YES	NO	YES	YES	NO	NO	NO			94		55+	23.8728
446	Cariango	Female	NO	Kimbundu	Scondary education I cycle	NO	No	NO	YES	NO	YES	NO	NO	YES	YES	YES	NO	NO	NO	NO	NO	138	89		97	15-24	26.3702
447	Cariango	Female	NO	Kimbundu	Primary education	NO	Yes, everyday	NO	NO	NO	NO	YES	NO	YES	NO	YES	NO	NO	YES	YES	NO	126	62		95	25-34	16.5606
448	Cariango	Female	NO	Kimbundu	Scondary education I cycle	NO	Yes, everyday	NO	YES	NO	NO	NO	NO	NO	YES	YES	YES	NO	YES	YES	NO	113	67	73		15-24	20.0288
449	Cariango	Male	NO	Other	Primary education	NO	No	YES	YES	NO	NO	NO	NO	YES	YES	NO					NO	116	65	88		15-24	15.6735
450	Cariango	Male	NO	Other	Secondary education II cycle	NO	NO	NO	YES	NO	NO	NO	NO	NO	NO	YES	NO	YES	NO	NO	NO	157	106		91	35-44	19.4708
451	Cariango	Female	NO	Kimbundu	Illiterate	NO	No	NO	NO	NO	YES	NO	NO	YES	YES	YES	NO	NO	YES	YES	NO	99	65		79	45-54	23.3377
452	Cariango	Male	NO	Kimbundu	Primary education	YES	No	NO	YES	YES	YES	NO	YES	YES	NO	YES	YES	YES	YES	YES	YES	111	76		83	35-44	18.4013
453	Cariango	Female	NO	Kimbundu	Primary education	NO	No	NO	YES	NO	YES	YES	NO	YES	YES	YES	YES	NO	YES	YES	NO	90	54		94	15-24	18.6307
454	Cariango	Male	NO	Kimbundu	Secondary education II cycle	NO	Yes, everyday	NO	YES	NO	NO	YES	YES	YES	YES	YES	NO	NO	NO	YES	NO	104	71	100		35-44	18.6628
455	Cariango	Male	NO	Kimbundu	Secondary education II cycle	NO	No	NO	NO	NO	YES	YES	NO	YES	YES	YES	NO	NO	NO	NO	NO	142	85	99		15-24	19.4708
456	Cariango	Male	NO		Scondary education I cycle	NO	No	YES	YES	YES	YES	YES	YES	YES	YES	YES						108	62	153		35-44	16.2809
457	Cariango	Female	NO	Kimbundu	Primary education	NO	No	NO	NO	NO	YES	YES	NO	YES	YES	YES	NO	NO	NO	NO	NO	122	95		90	35-44
458	Cariango	Female	NO	Kimbundu	Scondary education I cycle	NO	No	NO	YES	NO	NO	YES	NO	YES	YES	YES	NO	NO	NO	NO	NO	112	77		85	15-24	26.5338
459	Cariango	Female	NO	Kimbundu	Scondary education I cycle	NO	No	NO	NO	YES	NO	YES	NO	YES	YES	YES	NO	YES	YES	YES	NO	137	80	84		15-24	20.2395
460	Cariango	Female	NO	Other	Illiterate	NO	No	NO	NO	NO	YES	NO	YES	YES	YES	YES	YES	NO	YES	YES	NO	103	67		94	35-44	26.997
461	Cariango	Male	NO	Kimbundu	Scondary education I cycle	YES	No	NO	NO	NO	NO	YES	YES	YES	YES	NO	YES	YES	YES	YES	NO	98	63		83	45-54	14.8633
462	Cariango	Male	NO	Kimbundu	Scondary education I cycle	NO	No	YES	YES	YES	NO	NO	YES	YES	YES	YES	YES	YES	YES	YES	NO	118	46		100	25-34	15.3894
463	Cariango	Male		Kimbundu	Secondary education II cycle	NO	No	NO	YES	NO	NO	NO	YES	NO	NO	NO	NO	NO	NO	NO	YES	134	102	81		25-34	17.4776
464	Cariango	Female	NO	Kimbundu	Primary education	NO	NO	NO	YES	NO	YES	NO	YES	YES	YES	YES	YES	NO	YES	YES	NO	113	72		86	25-34	17.3134
465	Cariango	Male	NO	Kimbundu	Scondary education I cycle	NO	No	NO	NO	NO	YES	NO	NO	NO	YES	NO	NO	NO	YES	YES	NO	125	77		106	45-54	22.8875
466	Cariango	Male	NO	Other	Primary education	YES	Yes, everyday	YES	YES	NO	NO	NO	NO	NO	NO	YES	NO	YES	NO	NO	NO	105	70	94		45-54	19.6642
467	Cariango	Male	NO	Kimbundu	Secondary education II cycle	NO	No	YES	NO	NO	YES	YES	NO	YES	YES	YES	NO	YES	YES	YES	NO	130	79	140		15-24	18.6214
468	Cariango	Male	NO	Kimbundu													NO	NO	NO	YES	NO	120	63		166	25-34	19.6052
469	Cariango	Male	NO	Kimbundu	Secondary education II cycle	NO	No	NO	YES	NO	YES	YES	YES	YES	YES	YES	NO	NO	NO	YES	NO	95	60	99		35-44	19.4932
470	Cariango	Female	NO	Kimbundu	Primary education	NO	No	NO	YES	YES	YES	YES	YES	YES	YES	YES	NO	NO	NO	NO	NO	117	91		77	25-34	20.5761
471	Cariango	Male	NO	Kimbundu	Primary education	YES	Yes, sometimes	NO	YES	NO	YES	YES	YES	YES	YES	YES	NO	NO	NO	YES	NO	99	73		99	35-44	13.0395
472	Cariango	Male	NO	Other	Primary education	NO	No	YES	NO	NO	NO	NO	NO	YES	YES	YES	NO	NO	NO	YES	NO	124	74	94		25-34	19.4708
473	Cariango	Male	NO	Kimbundu	Scondary education I cycle	NO	Yes, sometimes	NO	YES	NO	NO	YES	YES	YES	YES	YES	NO	NO	NO	YES	NO	132	85	121		15-24	17.7734
474	Cariango	Female	NO	Bacongo	Secondary education II cycle	NO	NO	NO	YES	NO	yES	YES	NO	YES	YES	YES	NO	NO	NO	YES	NO	137	87		91	15-24	13.8835
475	Cariango	Male	NO	Kimbundu	Illiterate	NO	NO	NO	yES	NO	NO	YES	YES	YES	YES	YES	NO	NO	NO	YES	NO	137	87		101	55+	15.0391
476	Cariango	Male	NO	kimbundu	Scondary education I cycle	NO	Yes, sometimes	NO	yES	NO	yES	YES	YES	YES	YES	YES	NO	NO	NO	YES	NO	113	65		86	45-54	20.0184
477	Cariango	Male	NO	kimbundu	Secondary education II cycle	NO	NO	NO	YES	YES	NO	YES	NO	YES	YES	YES	NO	YES	YES	YES	NO	135	92	414		45-54	20.7613
478	Cariango	Male		Umbundo	Primary education	NO	Yes, sometimes	NO	NO	NO	NO	NO	NO	NO	NO	NO	NO	NO	NO	YES	NO				168	55+	21.551
479	Cariango	Female	NO	kimbundu	Secondary education II cycle	NO	No	NO	YES	NO	YES	YES	NO	YES	YES	YES	NO	NO	NO	YES	NO	121	77		103	15-24	12.8185
480	Cariango	Male	NO	kimbundu	Secondary education II cycle	NO	No	YES	YES	NO	YES	YES	NO	YES	YES	YES	NO	NO	NO	YES	NO	113	80		93	15-24	20.8984
481	Cariango	Male	NO	kimbundu	University	NO	No	NO	YES	NO	YES	YES	YES	YES	YES	YES	YES	YES	YES	YES	NO	100	65		83	15-24	21.9098
482	Cariango	Male		Kimbundu	Primary education	NO	No	NO	NO	NO	YES	YES	NO	YES	YES	YES	NO	NO	NO	NO	NO	170	93		90	55+	22.0317
483	Cariango	Male	NO	Kimbundu	Primary education	NO	No	NO	YES	NO	YES	YES	YES	YES	YES	YES	NO	YES	YES	YES	YES	157	81		84	55+	22.6562
484	Cariango	Male	NO	Kimbundu	Secondary education II cycle	NO	No	NO	YES	NO	YES	YES	NO	YES	YES	YES	NO	NO	NO	YES	NO	116	70		81	15-24	22.1404
485	Cariango	Female	NO	Bacongo		NO	Yes, sometimes	NO	YES	NO	YES	NO	NO	NO	YES	NO	YES	NO	NO	YES	NO	127	76		95	25-34	27.7344
486	Cariango	Female	NO	Kimbundu	Primary education	NO	NO	YES	YES	NO	YES	YES	NO	YES	YES	YES	NO	YES	YES	YES	NO	112	67		88	55+	24.098
487	Cariango	Male	NO	Kimbundu	Secondary education II cycle	NO	No	NO	YES	NO	YES	YES	NO	YES	YES	YES	NO	YES	NO	YES	NO	100	69	78		25-34	22.68
488	Cariango	Male	NO	Kimbundu	Primary education	NO	Yes, sometimes	NO	YES	NO	YES	YES	NO	YES	YES	YES	NO	NO	NO	NO	NO	119	87	116		35-44	24.7749
489	Cariango	Male	NO	Kimbundu	Primary education	NO	Yes, sometimes	YES	YES	NO	YES	YES	YES	YES	YES	YES	NO	YES	YES	YES	NO	87	67		96	45-54	13.8884
490	Cariango	Male	NO	Umbundo	Scondary education I cycle	NO	No	YES	YES	NO	YES	YES	YES	YES	YES	YES	YES	YES	YES	YES	NO	105	68		199	15-24	14.7094
491	HDP	Female	NO	Kimbundu	Primary education	NO	No	NO	YES	NO	NO	NO	NO	YES	YES	YES	NO	YES	NO	NO	NO	104	68	73		15-24	15.9033
492	HDP	Male	NO	Bacongo	Secondary education II cycle	NO	No	NO	NO	NO	NO	NO	NO	YES	YES	NO	NO	NO	NO	YES	NO	83	58		82	55+	17.6708
493	HDP	Female	NO	Bacongo	Scondary education I cycle	NO	NO	YES	YES	NO	NO	NO	NO	YES	YES	NO	NO	NO	YES	NO	NO	155	89	90		25-34	26.3728
494	HDP	Male	NO	Kimbundu	Primary education	NO	No	NO	YES	NO	NO	YES	YES	YES	YES	YES	YES	NO	YES	NO	NO	89	51	85		15-24	14.649
495	HDP	Female	NO	Umbundo	Scondary education I cycle	NO	No	NO	YES	NO	NO	YES	NO	YES	YES	NO	YES	YES	YES	NO	NO	80	50	117		45-54	14.7918
496	HDP	Female	NO	Kimbundu	Scondary education I cycle	NO	No	NO	YES	NO	NO	NO	NO	YES	NO	NO	NO	NO	YES	NO	NO	103	64	132		25-34	20.109
497	Cariango	Female	NO	Kimbundu	Secondary education II cycle	NO	No	NO	YES	NO	YES	YES	NO	YES	NO	YES	NO	NO	YES	YES	NO	100	70		76	15-24	17.6693
498	Cariango	Male	NO	Kimbundu	Primary education	NO	Yes, sometimes	NO	YES	NO	YES	YES	YES	YES	YES	YES	YES	NO	YES	YES	NO	121	88		106	25-34	17.9282
499	Cariango	Female	NO	Kimbundu	University	NO	Yes, sometimes	NO	YES	NO	NO	NO	NO	YES	NO	YES	NO	NO	NO	NO	NO			108		45-54	39.6532
500	Cariango	Female	NO	Kimbundu	Scondary education I cycle	NO	NO	NO	YES	NO	NO	NO	NO	YES	YES	YES	NO	NO	YES	NO	NO	140	103		93	25-34	23.0517
501	Cariango	Female	NO	Other	Primary education	NO	No	NO	YES	NO	YES	YES	YES	YES	YES	YES	NO	NO	YES	YES	YES	134	98		92	45-54	25.204
502	Cariango	Male	NO	Kimbundu	Primary education	YES	Yes, sometimes		YES	NO	YES	NO	NO	YES	NO	YES	NO	NO	NO	NO	NO	96	63	100		25-34	15.4959
503	Cariango	Female	NO	Other	Secondary education II cycle	NO	No	NO	NO	NO	YES	NO	YES	YES	YES	YES	NO	NO	YES	YES	YES	134	82	95		15-24	14.881
504	Cariango	Male	NO	Other	Secondary education II cycle	NO	No	NO	YES	YES	YES	YES	NO	NO	YES	YES	NO	YES	YES	YES	NO	95	59	173		15-24	18.3145
505	Cariango	Female	NO	Kimbundu	Illiterate	NO	Yes, sometimes	NO	YES	YES	YES	YES	NO	YES	YES	YES	NO	NO	YES	YES	YES	137	78		63	55+	24.841
506	Cariango	Male	NO	Kimbundu	University	NO	No	YES	YES	NO	NO	YES	NO	YES	YES	NO	NO	NO	NO	YES	NO	124	91	111		35-44	18.0785
507	Cariango	Female	NO	Kimbundu	Primary education	NO	No	NO	NO	NO	NO	YES	YES	YES	YES	YES	NO	YES	YES	YES	NO	101	77	89		25-34	24.0779
508	Cariango	Male	NO	Kimbundu	University	NO	No	NO	YES	NO	NO	NO	NO	NO	NO	YES	NO	NO	NO	NO	NO	112	65	98		25-34	22.46
509	Cariango	Female	NO	Kimbundu	Primary education	NO	Yes, sometimes	NO	YES	NO	YES	YES	NO	YES	YES	YES	NO	NO	YES	YES	NO	109	69	104		35-44	32.6608
510	Cariango	Male	NO	Kimbundu	Scondary education I cycle	NO	Yes, sometimes	NO	NO	NO	NO	NO	NO	NO	NO	YES	NO	NO	NO	NO	NO	125	72	108		25-34	22.4914
511	DAT	Male	YES	Other	Primary education	NO	No	NO	YES	NO	YES	YES	YES	YES	YES	YES	YES	YES	YES	YES	NO	102	57		123	15-24	16.038
512	DAT	Female		Other	Illiterate	NO	No	NO	YES	NO	YES	YES	YES	YES	YES	YES	YES	YES	YES	YES	NO	97	63		87	15-24	17.5431
513	DAT	Male	NO	Other	Scondary education I cycle	NO	No	YES	YES	YES	YES	YES	YES	YES	YES	YES	YES	YES	YES	YES	NO	93	61		91	25-34
515	DAT	Male	NO	Kimbundu	University	NO	No	YES	YES	YES	YES	YES	YES	YES	YES	YES	YES	YES	YES	YES	NO	135	100		159	45-54	20.8889
516	DAT	Male		Umbundo	Scondary education I cycle	NO	No	YES	YES	YES	YES	YES	YES	YES	YES	YES	NO	YES	YES	YES	NO	73	44		96	25-34	20.0778
517	DAT	Male	NO	Other	Primary education	NO	No	NO	YES	YES	YES	YES	YES	YES	YES	YES	YES	NO	NO	YES	NO	112	72		79	25-34	18.3655
518	DAT	Male		Kimbundu	Secondary education II cycle	NO	No	YES	YES	YES	YES	YES	YES	YES	YES	YES	YES	YES	YES	YES	NO	132	85		79	45-54
519	DAT	Male		Kimbundu	Primary education	NO	Yes, sometimes	YES	YES	NO	YES	NO	NO	YES	NO	NO					NO	92	68	112		25-34	23.0546
520	DAT	Male		Umbundo	Secondary education II cycle	NO	No	YES	YES	NO	YES	YES	YES	YES	YES	YES	YES	YES	YES	YES	NO	122	84			35-44	16.7657
521	DAT	Female	NO	Umbundo	Primary education	NO	No	NO	YES	NO	YES	YES	YES	YES	YES	YES	YES	YES	YES	YES	NO	145	94		104	45-54	21.7784
522	DAT	Male	NO	Kimbundu	Scondary education I cycle	NO	No	NO	YES	NO	yES	YES	YES	YES	YES	YES	YES	YES	YES	YES	NO	157	113		150	25-34	17.5278
523	DAT	Male	NO	Bacongo	Secondary education II cycle	NO	NO	NO	YES	NO	yES	YES	YES	YES	YES	YES	YES	YES	YES	YES	YES	147	98	94		45-54	32.8863
524	DAT	Male	NO	Other	Primary education	YES	Yes, sometimes	NO	YES	NO	yES	YES	YES	YES	YES	YES	YES	YES	YES	YES	NO	117	72		73	25-34	18.9069
525	DAT	Male	NO	Bacongo	Scondary education I cycle	NO	NO	NO	yES	NO	yES	YES	YES	YES	YES	YES	YES	YES	YES	YES	NO	145	98		74	35-44	22.5306
526	DAT	Female	NO	Other	Secondary education II cycle	NO	NO	NO	yES	NO	yES	YES	YES	YES	YES	YES	YES	YES	YES	YES	YES	134	95		77	25-34	18.1955
527	DAT	Female		Other	Secondary education II cycle	NO	NO	NO	YES	NO	YES	YES	YES	YES	YES	YES	YES	YES	YES	YES	NO	92	68		118	25-34	19.5556
528	DAT	Female	NO	Other	Scondary education I cycle	yES	No	NO	YES	NO	YES	YES	YES	YES	YES	YES	YES	YES	YES	YES	NO	111	69		67	35-44	17.6898
529	DAT	Male	NO	Other	University	NO	No	NO	YES	YES	YES	YES	YES	YES	YES	YES	YES	YES	YES	YES	NO	117	92		102	45-54	17.4413
530	DAT	Male	NO	Other	Primary education	NO	No	NO	NO	YES	YES	YES	YES	YES	YES	YES	YES	YES	YES	YES	NO	100	70		84	15-24	20.1951
531	DAT	Male	NO	kimbundu	Primary education	YES	Yes, sometimes	NO	YES	NO	YES	NO	YES	YES	YES	YES	YES	YES	YES	YES	NO	105	65		81	25-34	17.9688
722	Cariango	Male	NO	kimbundu	Primary education	NO	NO	NO	YES	NO	NO	NO	YES	YES	YES	YES	YES	YES	YES	NO	NO	113	53		103	55+
533	DAT	Female	NO	Kimbundu	Illiterate	NO	No	NO	YES	YES	YES	YES	YES	YES	YES	YES	YES	YES	YES	YES	YES	124	85		92	45-54	25
534	DAT	Female	NO	Kimbundu	Scondary education I cycle	NO	No	YES	YES	NO	YES	NO	NO	YES	NO	NO	YES	NO	YES	YES	NO	120	98		112	15-24	20.4444
535	DAT	Female	NO	Kimbundu		NO	NO	NO	YES	YES	NO	NO	YES	NO	NO	NO	YES	YES	YES	YES	NO	185	142		87	35-44	20.6905
536	DAT	Male	NO	Kimbundu	Scondary education I cycle	NO	Yes, sometimes	YES	YES	YES	YES	YES	YES	YES	YES	YES	NO	YES	YES	YES	NO	94	70		121	35-44	17.6471
537	DAT	Male	NO	Kimbundu		NO	No	YES	YES	NO	YES	NO	NO	NO	NO	NO	NO	NO	NO	NO	NO	108	66		105	15-24	17.9931
538	DAT	Male	NO	Kimbundu	Scondary education I cycle	NO	No	YES	YES	NO	YES	NO	NO	YES	NO	NO	NO	NO	NO	NO	NO	96	62		95	55+	19.0039
539	DAT	Male	NO	Kimbundu	Illiterate	YES	Yes, sometimes	YES	YES	NO	YES	YES	YES	NO	YES	YES	YES	YES	YES	YES	NO	91	56		87	45-54	19.563
540	DAT	Male	NO	Bacongo	Scondary education I cycle	NO	No	NO	YES	NO	YES	NO	NO	NO	NO	NO	NO	NO	NO	NO	NO	133	71		95	15-24	19.8352
541	DAT	Female	NO	Kimbundu	Secondary education II cycle	NO	No	NO	YES	NO	YES	NO	NO	NO	NO	NO	NO	NO	NO	NO	NO	96	63		66	15-24	25.2363
542	DAT	Female	NO	Kimbundu	Scondary education I cycle	NO	No	NO	YES	NO	YES	YES	NO	YES	YES	YES	YES	YES	YES	YES	NO	103	58		131	35-44
543	DAT	Female	NO	Kimbundu	Illiterate	NO	NO	YES	NO	YES	YES	YES	YES	YES	YES	YES	YES	YES	NO	NO	NO	128	86		92	35-44	20.6612
544	DAT	Male	NO	Kimbundu	Scondary education I cycle	YES	Yes, sometimes	NO	YES	YES	YES	YES	YES	YES	YES	YES	NO	YES	YES	YES	NO	93	49		95	55+	21.1073
545	DAT	Male	NO	Umbundo	Scondary education I cycle	YES	No	NO	YES	NO	YES	NO	NO	NO	NO	NO	NO	NO	NO	NO	NO	92	64		93	35-44	20.9573
546	DAT	Male	NO	Kimbundu	University	NO	No	NO	YES	NO	YES	YES	NO	YES	YES	YES	YES	YES	YES	YES	NO	125	79	174		25-34	21.3859
547	DAT	Male	NO	Kimbundu	Scondary education I cycle	YES	Yes, sometimes		YES	NO	YES	NO	NO	NO	NO	NO	NO	NO	NO	NO	NO	112	60		82	35-44	18.8707
548	DAT	Male	NO	Kimbundu	Scondary education I cycle	NO	NO	NO	YES	NO	YES	NO	NO	NO	NO	NO	NO	NO	NO	NO	NO	116	54	77		15-24	17.4747
549	DAT	Male	NO	Umbundo	Secondary education II cycle	NO	Yes, sometimes	NO	YES	NO	YES	NO	NO	NO	NO	NO	NO	NO	NO	NO	NO	123	79		88	25-34	25.5588
550	DAT	Female	NO	Kimbundu	Secondary education II cycle	NO	NO	NO	YES	NO	YES	NO	NO	NO	NO	NO	NO	NO	NO	NO	NO	123	79	120		25-34	26.2222
551	DAT	Female	NO	Kimbundu	Illiterate	NO	No	NO	YES	NO	YES	NO	NO	NO	NO	NO	NO	NO	NO	NO	NO	122	96		87	25-34	21.2279
552	DAT	Male	NO	Umbundo	Primary education	NO	No	YES	YES	YES	YES	YES	YES	YES	YES	YES	YES	YES	YES	YES	NO	137	91	132		35-44	23.9995
554	DAT	Female	NO	Kimbundu	Primary education	YES	Yes, sometimes	YES	YES	NO	YES	NO	NO	YES	NO	NO	YES	NO	NO	NO	YES	127	84		81	45-54	26.398
555	DAT	Female	NO	Bacongo	Primary education	NO	No	NO	YES	NO	YES	YES	NO	NO	YES	YES	YES	YES	YES	NO	NO	208	116		89	45-54	27.8852
556	DAT	Female	NO	Kimbundu	Scondary education I cycle	NO	No	YES	YES	NO	YES	YES	YES	YES	YES	YES	NO	NO	NO	YES	NO	150	90	110		35-44	28.125
557	Cacuaco	Female	NO	Kimbundu	Scondary education I cycle	NO	Yes, sometimes	NO	YES	NO	YES	NO	NO	YES	YES	YES	NO	NO	NO	NO	NO	114	76			35-44	17.284
558	Cacuaco	Male	NO	Kimbundu	Secondary education II cycle	YES	Yes, sometimes	NO	YES	NO	NO	NO	NO	YES	NO	NO	NO	NO	NO	NO	NO	109	69		156	55+	17.4694
559	Cacuaco	Female	NO	Kimbundu	Scondary education I cycle	NO	No	NO	NO	NO	NO	NO	NO	YES	NO	NO	NO	NO	NO	NO	NO				91	45-54	40.0091
560	Cacuaco	Male	NO	Umbundo	Secondary education II cycle	NO	Yes, sometimes	NO	YES	NO	NO	NO	NO	YES	NO	NO	NO	NO	NO	NO	NO	111	83		85	15-24	19.5965
561	Cacuaco	Male	NO	Bacongo	Scondary education I cycle	NO	Yes, sometimes	NO	NO	NO	NO	NO	NO	YES	NO	NO	NO	NO	NO	YES	NO	132	82		89	25-34	16.263
562	Cacuaco	Male	NO	Umbundo	Illiterate	YES	No	NO	YES	NO	NO	NO	NO	YES	NO	NO	NO	NO	NO	NO	NO	100	66	94		25-34	18.3594
563	Cacuaco	Male	NO	Bacongo	Scondary education I cycle		Yes, sometimes	NO	YES	NO	NO	NO	NO	YES	YES	YES	NO	NO	NO	NO	NO	136	77	134		25-34	16.7311
564	Cacuaco	Male	NO	Bacongo	Secondary education II cycle	YES	Yes, sometimes	NO	YES	NO	YES	NO	NO	YES	NO	YES	NO	NO	NO	NO	NO	88	55		129	45-54
565	Cacuaco	Female	NO	Umbundo	Scondary education I cycle	NO	No	NO	YES	NO	NO	NO	NO	YES	NO	NO	NO	NO	NO	NO	NO	110	73		102	15-24	22.0934
566	Cacuaco	Male	NO	Kimbundu	Primary education	YES	Yes, everyday	NO	NO	NO	YES	NO	NO	YES	YES	NO	NO	NO	NO	YES	NO	91	52		147	35-44	18.9802
567	Cacuaco	Male	NO	Bacongo	Scondary education I cycle	NO	No	NO	YES	NO	YES	YES	YES	YES	YES	NO	NO	NO	NO	NO	NO	75	51	89		15-24	14.3674
568	Cacuaco	Female	NO	Bacongo	Scondary education I cycle	NO	Yes, sometimes	NO	YES	NO	NO	NO	YES	YES	YES	YES	NO	NO	NO	YES	NO	115	77		64	35-44	22.3413
569	Cacuaco	Female	NO	Umbundo	Primary education	NO	No	NO	YES	NO	YES	YES	NO	YES	YES	NO	NO	NO	NO	NO	YES	118	81		92	25-34	20.8984
570	Cacuaco	Male	NO	Umbundo	Scondary education I cycle	NO	No	NO	YES	NO	YES	YES	NO	YES	NO	YES	NO	NO	NO	NO	NO	144	85		99	25-34	18.2531
571	Cacuaco	Male	NO	Umbundo	Primary education	NO	No	NO	NO	NO	YES	NO	YES	YES	NO	YES	NO	NO	NO	NO	NO	97	58		92	35-44	17.1563
572	Cacuaco	Female	NO	Umbundo	Scondary education I cycle			NO	NO	NO	NO	YES	NO	YES	NO	YES	NO	NO	NO	NO	NO		70		106	15-24	20.3857
573	Cacuaco	Male	NO	Umbundo	Primary education	YES	Yes, everyday	NO	YES	NO	yES	YES	YES	NO	NO	NO	YES	YES	YES	YES	NO	98	65		83	15-24	20.6852
574	Cacuaco	Female	NO	Umbundo	Scondary education I cycle	NO	NO	NO	YES	NO	yES	YES	YES	NO	NO	NO	NO	NO	NO	YES	NO	109	66		89	15-24	19.3821
575	Cacuaco	Male	NO	Bacongo	Secondary education II cycle	NO	NO	NO	NO	NO	NO	NO	NO	NO	NO	NO	NO	NO	NO	NO	NO	121	82		97	55+	22.3692
576	Cacuaco	Male	NO	Umbundo	Scondary education I cycle	NO	NO	NO	yES	YES	NO	NO	NO	YES	YES	NO	NO	NO	NO	NO	NO	121	80		100	25-34	17.8565
577	Cacuaco	Male	NO	Bacongo	Secondary education II cycle	NO	NO	NO	NO	NO	NO	NO	NO	NO	NO	NO	NO	NO	NO	NO	NO	106	71		90	15-24	14.7059
578	Cacuaco	Male	NO	Umbundo	University	NO	No	NO	YES	NO	YES	NO	NO	YES	YES	YES	NO	NO	NO	NO	NO	112	71	108		15-24	16.732
579	Cacuaco	Male	NO	Bacongo	Scondary education I cycle	NO	No	NO	YES	YES	NO	NO	NO	YES	YES	YES	NO	NO	NO	NO	NO	133	86	143		25-34	18.5628
580	Cacuaco	Female	NO	kimbundu	University	NO	Yes, sometimes	NO	NO	NO	NO	NO	NO	YES	NO	NO	NO	NO	NO	NO	NO	123	88	90		35-44	19.2974
581	Cacuaco	Male	NO	kimbundu	Primary education	NO	No	YES	YES	YES	NO	NO	NO	NO	NO	NO	NO	NO	NO	NO	NO	123	72	155		45-54	19.8352
582	Cacuaco	Male	NO	Bacongo	Secondary education II cycle	NO	Yes, sometimes	NO	YES	NO	NO	NO	YES	NO	NO	YES	NO	NO	NO	NO	NO	121	83		94	15-24	17.1429
583	Cacuaco	Male	NO	Bacongo	Scondary education I cycle	YES	Yes, sometimes	NO	YES	NO	NO	NO	NO	YES	NO	NO	NO	NO	NO	NO	NO	114	73	140		45-54	20.4284
584	Cacuaco	Female	NO	Bacongo	Primary education	NO	No	NO	NO	NO	NO	NO	NO	NO	NO	NO	NO	NO	NO	NO	YES	133	73		100	55+	16.8739
585	Cacuaco	Male	NO	Kimbundu	Scondary education I cycle	NO	Yes, sometimes	NO	YES	NO	YES	NO	YES	YES	NO	YES	NO	NO	NO	YES	NO	117	72		89	15-24	15.6087
586	HDP	Male	NO	Bacongo	University	NO	No	NO	YES	NO	NO	NO	NO	NO	NO	NO	NO	NO	NO	NO	NO	102	71	88		45-54	20.227
587	HDP	Male	NO	Kimbundu	Secondary education II cycle		No	NO	YES	NO	NO	NO	NO	NO	YES	YES	YES	NO	NO	NO	NO	102	67	183		45-54	18.8942
588	HDP	Male	NO	Bacongo	Scondary education I cycle	NO	Yes, sometimes	NO	YES	NO	NO	NO	NO	YES	NO	NO	YES	NO	NO	YES	NO	96	50	87		15-24	17.9931
589	HDP	Male	NO	Bacongo	University	NO	No	NO	YES	NO	NO	NO	NO	YES	YES	NO	NO	YES	NO	NO	NO	132	74		91	25-34	18.8492
590	HDP	Male	NO	Umbundo	University	NO	No	NO	YES	NO	NO	NO	NO	YES	NO	NO	YES	NO	NO	NO	NO	110	57	99		15-24	16.5147
591	HDP	Male	NO	Kimbundu	Primary education	YES	No	NO	YES	NO	YES	YES	NO	YES	YES	YES	YES	NO	NO	NO	NO	70			70	55+	13.5156
592	HDP	Male	NO	Kimbundu	Secondary education II cycle	NO	No	NO	YES	NO	YES	YES	NO	YES	YES	YES	NO	NO	NO	YES	NO	99	55		103	25-34	15.8495
593	HDP	Female	NO	Bacongo	Primary education	NO	NO	NO	YES	NO	YES	YES	NO	YES	YES	NO	YES	NO	NO	YES	NO	128	82		86	35-44
594	HDP	Female	NO	Kimbundu	Primary education	NO	No	NO	YES	NO	YES	YES	NO	YES	YES	YES	YES	NO	YES	YES	NO	125	74		101	25-34	23.9545
595	HDP	Male	NO	Kimbundu	Scondary education I cycle	NO	No	NO	YES	NO	YES	YES	NO	YES	YES	NO	YES	NO	YES	YES	NO	100	67		103	15-24	16.7062
596	HDP	Female	NO	Kimbundu	Scondary education I cycle	NO	No	NO	YES	NO	YES	YES	NO	YES	YES	NO	YES	NO	YES	NO	NO	84	51	97		25-34	16.1843
597	HDP	Male	NO	Bacongo	Secondary education II cycle	NO	Yes, sometimes	NO	YES	NO	YES	NO	NO	YES	YES	NO	NO	YES	NO	NO	NO	107	59		91	15-24
598	HDP	Female	NO	Kimbundu	Primary education	NO	NO	NO	YES	NO	YES	YES	NO	YES	YES	NO	YES	NO	NO	YES	NO	131	100	77		35-44	16.0145
599	HDP	Male	NO	Bacongo	Secondary education II cycle	NO	NO	NO	NO	YES	NO	YES	NO	YES	YES	NO	YES	NO	NO	NO	YES				89	55+	19.8868
600	HDP	Female																								25-34
601	HDP	Male	NO	Kimbundu	Scondary education I cycle	NO	No	NO	YES	NO	NO	NO	NO	NO	NO	NO	NO	NO	NO	NO	NO	131	81	75		35-44	16.3847
602	HDP	Male	NO	Umbundo	Secondary education II cycle	NO	No	NO	YES	NO	NO	NO	NO	YES	YES	NO	NO	NO	NO	NO	NO	95	40	104		15-24	17.6898
603	HDP	Male																								25-34
604	HDP	Male	NO	Other	Scondary education I cycle	NO	No	NO	YES	NO	NO	NO	NO	YES	YES	YES	NO	YES	YES	YES	NO	92	41	85		25-34	19.5602
605	HDP	Male	NO	Kimbundu	Scondary education I cycle	NO	No	NO	YES	NO	NO	YES	NO	YES	YES	NO	NO	NO	NO	YES	NO	105	61	106		35-44	15.3022
606	HDP	Male	NO	Kimbundu	Primary education	NO	No	NO	YES	NO	NO	NO	NO	YES	YES	NO	NO	NO	YES	NO	NO	110	72	85		25-34	19.6006
607	HDP	Female	NO	Bacongo	Scondary education I cycle	NO	No	NO	YES	NO	YES	NO	NO	YES	NO	NO	NO	NO	NO	NO	NO	92	52	83		15-24	15.6147
608	HDP	Female	NO	Bacongo	Primary education	NO	No	NO	YES	NO	YES	NO	NO	YES	YES	NO	NO	NO	YES	NO	NO	90	57	70		55+	19.5312
609	HDP	Male	NO	Kimbundu	Primary education	YES	Yes, sometimes	NO	YES	NO	NO	NO	NO	NO	YES	NO	YES	NO	NO	NO	NO	107	68		73	25-34	16.2788
610	HDP	Male	NO	Kimbundu	Secondary education II cycle	YES	No	NO	YES	YES	YES	YES	YES	NO	YES	NO	NO	NO	NO	NO	NO	101	60		80	25-34	16.955
611	HDP	Male	NO	Kimbundu	University	NO	Yes, sometimes	NO	YES	NO	NO	YES	YES	YES	NO	YES	NO	NO	YES	YES	NO	143	100		76	35-44	21.7079
612	HDP	Male	NO	Kimbundu	Scondary education I cycle	NO	No	NO	YES	NO	YES	NO	YES	NO	YES	YES	NO	NO	NO	YES	NO	106	55		81	15-24	18.3594
613	HDP	Male	NO	Kimbundu	Scondary education I cycle	NO	No	NO	NO	NO	YES	NO	NO	YES	NO	YES	NO	YES	NO	NO	YES	151	110	87		45-54	30.8113
614	HDP	Female	NO	Kimbundu	Scondary education I cycle	NO	No	YES	YES	NO	YES	NO	YES	YES	YES	YES	YES	YES	YES	YES	NO	111	61			25-34
615	HDP	Male		Kimbundu	Secondary education II cycle	NO	Yes, sometimes	YES	YES	YES	YES	NO	YES	YES	NO	YES	YES	YES	YES	YES	NO	97	77		124	25-34	18.6851
616	HDP	Male	NO	Kimbundu	Scondary education I cycle	NO	No	NO	YES	YES	YES	YES	YES	YES	NO	NO	NO	YES	NO	NO	NO	128	85			35-44
617	HDP	Male	NO	Bacongo	Scondary education I cycle	NO	No	NO	YES	YES	NO	NO	NO	NO	YES	YES	NO	NO	NO	YES	NO	125	78		96	45-54
618	HDP	Male		kimbundu		NO	Yes, sometimes	NO	YES	NO	YES	YES	YES	YES	YES	YES	NO	YES	NO	NO	NO	110	79		88	15-24	18.5178
619	HDP	Male	NO	kimbundu	Scondary education I cycle	NO	No	NO	YES	NO	YES	NO	NO	NO	NO	NO	NO	NO	NO	NO	NO	97	52	77		15-24	14.8788
620	HDP	Female	NO	kimbundu	Scondary education I cycle	NO	No	NO	YES	NO	YES	NO	NO	NO	NO	NO	NO	NO	NO	NO	NO	188	82		87	35-44	22.2222
621	HDP	Female	NO	kimbundu	Secondary education II cycle	NO	No	NO	YES	NO	NO	NO	NO	NO	NO	YES	NO	NO	NO	NO	NO	117	79		93	25-34	28.3987
622	HDP	Female	NO	kimbundu	Scondary education I cycle	NO	Yes, sometimes	NO	YES	NO	yES	NO	NO	NO	NO	NO	NO	NO	NO	NO	NO	139	57	90		25-34	34.1311
623	HDP	Male	NO	kimbundu	Scondary education I cycle	NO	NO	NO	YES	NO	yES	NO	NO	NO	NO	NO	NO	NO	NO	NO	NO	102	71		77	25-34	17.7154
624	Cariango	Female	NO	Other	Primary education	NO	Yes, sometimes	NO	YES	YES	yES	YES	YES	YES	YES	YES	YES	YES	YES	YES	YES	227	161		81	35-44	21.1073
625	Cariango	Male	NO	kimbundu	Scondary education I cycle	NO	NO	YES	yES	NO	NO	NO	YES	YES	NO	YES	YES	NO	YES	NO	NO					45-54
626	Cariango	Male	NO	Umbundo	Primary education	NO	NO	NO	yES	NO	YES	YES	YES	YES	YES	YES	YES	NO	NO	NO	NO	116	70		97	45-54	20.4783
627	Cariango	Male	NO	Bacongo	Scondary education I cycle	NO	NO	NO	YES	NO	YES	YES	YES	YES	NO	YES	YES	YES	YES	YES	NO	127	77		89	35-44	21.5645
628	Cariango	Male	NO	Bacongo	Primary education	NO	Yes, sometimes	NO	YES	NO	YES	NO	NO	YES	YES	YES	YES	NO	NO	NO	NO	111	75	97		35-44	18.75
629	Cariango	Male	YES	Other	University	NO	No	YES	YES	NO	YES	YES	YES	YES	YES	YES	NO	YES	YES	YES	NO	97	61	101		35-44	17.9931
630	Cariango	Female	NO	kimbundu	Secondary education II cycle	NO	Yes, sometimes	NO	YES	NO	YES	YES	YES	YES	YES	YES	NO	YES	YES	YES	YES	87	68		111	35-44	44.1482
631	Cariango	Male	NO	Other	Secondary education II cycle	NO	No	NO	YES	NO	YES	YES	YES	YES	YES	YES	YES	YES	YES	YES	NO	103	56		104	15-24	16.845
632	Cariango	Male	NO	Kimbundu	Scondary education I cycle	NO	No	NO	YES	NO	YES	NO	YES	YES	YES	YES	YES	YES	YES	YES	NO	93	73		89	35-44
633	Cariango	Male	NO	Kimbundu	Secondary education II cycle	NO	Yes, sometimes	NO	YES	NO	YES	NO	YES	YES	YES	YES	YES	NO	YES	YES	YES	87	53		85	45-54	16.456
634	Cariango	Male	NO	Kimbundu	Scondary education I cycle	NO	No	NO	YES	NO	YES	YES	NO	YES	NO	NO	YES	YES	YES	YES	NO	92	62		76	25-34	19.63
635	Cariango	Female	NO	Kimbundu	Illiterate	NO	No	NO	YES	YES	NO	YES	NO	YES	YES	NO	NO	NO	YES	NO	NO	72	55		163	55+	19.6311
636	Cariango	Female	NO	Kimbundu	Secondary education II cycle	NO	No	NO	YES	NO	NO	YES	NO	YES	YES	NO	NO	NO	NO	NO	NO	93	48	116		25-34	16.3847
637	Cariango	Female	NO	Kimbundu	Illiterate	NO	No	NO	YES	NO	NO	YES	NO	YES	NO	YES	YES	NO	NO	YES	YES	171	83	97		55+	18.6115
638	Cariango	Male	NO	Kimbundu	Illiterate	NO	No	NO	YES	NO	NO	NO	NO	YES	YES	NO	YES	NO	NO	NO	YES	187	111		92	45-54	26.8387
639	Cariango	Male	NO	Kimbundu	Primary education	NO	No	YES	YES	NO	YES	YES	NO	YES	NO	YES	NO	NO	NO		NO	133	82		84	35-44	15.3469
640	Cariango	Female	NO	Kimbundu	University	NO	No	NO	YES	NO	YES	NO	NO	YES	NO	NO	NO	YES	NO	NO	NO	106	65		77	15-24	16.5889
641	Cariango	Male	NO	Kimbundu	Scondary education I cycle	NO	No	NO	YES	NO	NO	NO	YES	YES	NO	YES	NO	NO	NO	NO	NO	96	67	99		35-44	17.9163
642	Cariango	Male	NO		Scondary education I cycle	NO	Yes, sometimes		YES	NO	NO	NO	NO	YES	YES	NO	NO	NO	YES	NO	NO	124	86	99		25-34	15.3967
643	Cariango	Female	NO	Kimbundu	Primary education	NO	NO	YES	YES	NO	NO	YES	NO	YES	NO	NO	YES	NO	YES	NO	YES	127	90	80		45-54	25.3154
644	Cariango	Male	NO	Kimbundu	Secondary education II cycle	YES	Yes, sometimes	NO	YES	NO	NO	NO	NO	YES	YES	YES	NO	NO	NO	YES	NO	127	85		100	45-54	19.3625
645	Cariango	Male	NO	Kimbundu	Secondary education II cycle	NO	No	NO	YES	NO	NO	YES	NO	YES	YES	YES	NO	NO	YES	NO	NO	111	65	163		25-34	15.4056
646	Cariango	Female	NO	Kimbundu	Primary education	NO	No	NO	YES	NO	NO	YES	NO	YES	YES	YES	NO	NO	NO	YES	NO	88	57		112	25-34	19.6752
647	Cariango	Male	NO	Kimbundu	Primary education	NO	Yes, sometimes	NO	YES	NO	NO	YES	NO	YES	NO	YES	NO	NO	YES	NO	NO	97	64	93		45-54	19.257
648	Cariango	Female	NO	Kimbundu	Secondary education II cycle	NO	NO	NO	NO	NO	NO	NO	NO	NO	NO	YES	NO	NO	NO	NO	NO	149	98	166		45-54	38.9348
649	Cariango	Male	NO	Kimbundu	Primary education	NO	NO	NO	NO	NO	NO	NO	NO	YES	NO	NO	NO	YES	NO	NO	NO	97	55		87	15-24	15.6735
650	Cariango	Female	NO	Kimbundu	Primary education	NO	No	NO	NO	NO	YES	YES	YES	NO	YES	YES	NO	NO	NO	YES	YES	158	103	94		35-44	20.83
651	Cariango	Male	NO	Kimbundu	Primary education	NO	No	NO	YES	NO	YES	NO	NO	YES	NO	NO	NO	NO	YES	NO	NO	106	71		111	35-44	17.9282
652	Cariango	Female	NO	Kimbundu	Primary education	NO	No	NO	YES	NO	YES	YES	YES	YES	NO	YES	NO	NO	YES	YES	NO	120	68		125	15-24	15.9675
653	Cariango	Female	NO	Kimbundu	Primary education	NO	No	NO	YES	YES	NO	YES	NO	NO	NO	YES	NO	NO	NO	NO	NO	116	77		89	45-54	25.2081
654	Cariango	Female	NO	Bacongo	Secondary education II cycle	NO	No	NO	YES	NO	YES	YES	YES	YES	NO	YES	NO	NO	YES	YES	NO	107	43	107		15-24	15.3697
655	Cariango	Female	NO	Kimbundu	Scondary education I cycle	NO	No	NO	YES	NO	YES	YES	NO	YES	YES	NO	NO	NO	YES	NO	NO	120	90		81	25-34	21.4109
656	Cariango	Male	NO	Kimbundu	Scondary education I cycle	NO	No	NO	YES	NO	YES	YES	YES	YES	YES	YES	NO	NO	YES	YES	NO	99	65		90	25-34	17.6327
657	Cariango	Male	NO	Other	Scondary education I cycle	NO	Yes, sometimes	NO	YES	NO	YES	NO	NO	YES	NO	NO	NO	NO	YES	NO	NO	143	100		102	45-54	23.3067
658	Cariango	Female	NO	Kimbundu	Secondary education II cycle	NO	No	NO	YES	NO	YES	NO	NO	YES	NO	YES	YES	YES	YES	NO	NO	105	74		102	45-54	22.4813
659	Cariango	Male	NO	Kimbundu	Primary education	NO	No	NO	YES	NO	NO	YES	YES	YES	YES	YES	YES	YES	YES	YES	NO	97	89	109		55+	18.5911
660	Cariango	Male	NO	Other	Scondary education I cycle	NO	No	NO	YES	NO	NO	NO	NO	YES	NO	NO	NO	YES	NO	NO	NO	118	66	108		35-44	17.6308
661	Cariango	Female	NO	Kimbundu	Scondary education I cycle	NO	No	NO	YES	NO	YES	YES	NO	YES	NO	YES	NO	NO	YES	NO	NO	108	86	67		15-24	23.0469
662	Cariango	Female	NO	Kimbundu	Illiterate	NO	No	NO	YES	NO	NO	NO	NO	YES	YES	NO	NO	NO	YES	NO	NO	102	67	75		25-34	22.3757
663	Cariango	Female	NO	Kimbundu	Illiterate	NO	No	NO	YES	NO	YES	NO	NO	YES	YES	NO	NO	YES	NO	NO	YES	213	121	119		55+	20.3244
664	Cariango	Female	NO	Kimbundu	Illiterate	NO	No	NO	YES	YES	YES	YES	YES	YES	YES	YES						123	79	84		25-34	17.8465
665	Cariango	Male	NO		Primary education	NO	Yes, sometimes	NO	NO	NO	NO	NO	NO	YES	NO	NO	NO	NO	NO	NO	NO					25-34
666	Cariango	Male	NO	Kimbundu	Primary education	NO	No	YES	YES	NO	YES	NO	YES	YES	YES	NO	NO	NO	NO	NO	NO	144	64		143	25-34	22.913
667	Cariango	Female	NO		Secondary education II cycle	NO	No	NO	YES	NO	NO	YES	NO	YES	NO	YES	NO	NO	YES	YES	NO	111	69		110	15-24	16.8802
668	Cariango	Male	NO	kimbundu	Scondary education I cycle	NO	Yes, sometimes	NO	YES	NO	NO	NO	NO	NO	NO	NO					NO	109	57	89		25-34	16.7872
669	Cariango	Male	NO	kimbundu	Scondary education I cycle	NO	Yes, sometimes	YES	YES	YES	YES	YES	NO	YES	YES	YES	NO	NO	NO	NO	NO	101	50	154		35-44	19.2653
670	Cariango	Male	NO	kimbundu	Scondary education I cycle	NO	Yes, sometimes	NO	YES	NO	YES	YES	YES	YES	YES	YES	NO	YES	YES	YES	NO	129	97		65	25-34	17.1753
671	Cariango	Male	NO		Secondary education II cycle	NO	No	NO	NO	NO	NO	NO	NO	YES	YES	YES	YES	YES	NO	NO	NO	88	60		66	15-24	17.9012
672	Cariango	Male	NO	kimbundu	Scondary education I cycle	NO	Yes, sometimes	YES	YES	NO	yES	YES	YES	YES	YES	YES	YES	YES	YES	YES	NO	127	87		111	25-34	16.2292
673	Cariango	Male	NO	kimbundu	Secondary education II cycle	NO	Yes, sometimes	NO	YES	NO	yES	YES	YES	NO	YES	YES	NO	NO	YES	YES	YES	105	71	173		25-34	16.1354
674	Cariango	Male	NO	kimbundu	Scondary education I cycle	NO	Yes, sometimes	NO	YES	NO	yES	YES	NO	YES	YES	YES	NO	YES	NO	YES	NO	188	92		101	25-34	20.7031
675	Cariango	Female	NO	Umbundo	Secondary education II cycle	NO	NO	NO	yES	NO	NO	NO	NO	YES	NO	YES	YES	NO	YES	NO	NO	119	73		86	15-24	17.239
676	Cariango	Male	NO	kimbundu	Secondary education II cycle	NO	NO	NO	NO	NO	NO	NO	YES	YES	YES	YES	NO	NO	NO	NO	NO	115	80	110		15-24	18.3391
677	Cariango	Male	NO	kimbundu	Scondary education I cycle	NO	NO	NO	YES	NO	YES	YES	YES	YES	YES	YES	NO	YES	YES	YES	NO	104	86	89		15-24	16.2982
678	Cariango	Female	NO	kimbundu	Primary education	NO	No	YES	NO	NO	NO	YES	NO	YES	NO	NO	NO	NO	NO	YES	YES	135	89	72		55+	18.6709
679	Cariango	Male	NO	kimbundu	Primary education	NO	No	YES	YES	NO	NO	NO	YES	YES	NO	NO	YES	YES	YES	NO	NO	75	52	100		35-44	17.3134
680	Cariango	Male	NO	Other	Primary education	NO	No	NO	YES	YES	NO	YES	YES	NO	NO	NO	NO	YES	NO	YES	NO	158	105	114		45-54	22.0317
681	Cariango	Male	NO	Kimbundu	Secondary education II cycle	NO	Yes, sometimes	YES	NO	YES	YES	YES	YES	YES	NO	NO	NO	YES	YES	YES	NO	98	64	89		25-34	14.8789
682	Cariango	Female	NO	Kimbundu	Illiterate	NO	No	NO	YES	NO	YES	YES	YES	YES	YES	YES	NO	NO	NO	YES	YES	120	74	99		35-44	20.1732
683	Cariango	Male	NO	Kimbundu	Secondary education II cycle	NO	No	NO	YES	YES	NO	NO	NO	YES	NO	YES	NO	NO	NO	YES	NO	148	83		109	35-44	25.7657
684	Cariango	Female	NO	Kimbundu	Primary education	NO	Yes, sometimes	NO	YES	NO	YES	YES	YES	NO	YES	YES	NO	YES	YES	YES	NO	85	52	103		45-54
685	Cariango	Male	NO	Kimbundu	Scondary education I cycle	NO	Yes, sometimes	NO	YES	NO	NO	NO	YES	YES	YES	YES	YES	YES	YES	YES	NO	102	74		66	15-24	16.2788
686	Cariango	Male	NO	Kimbundu	Scondary education I cycle	NO	No	YES	YES	NO	YES	YES	NO	YES	YES	YES	NO	NO	YES	YES	NO	106	67		71	25-34	16.8525
687	Cariango	Female	NO	Kimbundu	Illiterate	NO	No	NO	YES	NO	NO	YES	YES	YES	NO	NO	NO	YES	NO	NO	NO	137	98		91	35-44	21.6441
688	Cariango	Male	NO	Kimbundu	Scondary education I cycle	NO	Yes, sometimes	NO	YES	NO	NO	YES	NO	YES	YES	YES	NO	NO	YES	NO	NO	146	86		104	15-24	25.8806
689	Cariango	Male	NO	Umbundo	Scondary education I cycle	NO	No	YES	YES	NO	NO	YES	NO	YES	YES	YES	NO	NO	NO	NO	NO	102	68	134		15-24	18.4425
690	Cariango	Female	NO	Kimbundu	Scondary education I cycle			NO	NO	NO	NO	YES	NO	YES	NO	YES	YES	NO	NO	YES	NO	115	81	85		25-34	15.7888
691	Cariango	Male	NO	Kimbundu	Secondary education II cycle	NO	Yes, sometimes	YES	YES	NO	YES	YES	NO	NO	YES	NO	NO	NO	NO	NO	NO	109	62		71	15-24	15.7313
692	Cariango	Female	NO	Kimbundu	Scondary education I cycle	NO	NO	NO	YES	NO	YES	YES	YES	YES	YES	YES	NO	NO	YES	NO	NO	107	64	105		15-24	17.4747
693	Cariango	Male	NO	Kimbundu	Illiterate	NO	NO	NO	YES	YES	NO	YES	YES	NO	YES	YES	NO	YES	NO	NO	NO	111	69		80	15-24	19.3821
694	Cariango	Male	NO	Other	Scondary education I cycle	NO	No	NO	YES	YES	YES	YES	NO	YES	YES	YES	NO	YES	YES	YES	NO	92	65	113		15-24	17.3744
695	Cariango	Male	NO	Kimbundu	Primary education	NO	Yes, sometimes	NO	YES	YES	YES	NO	YES	NO	YES	YES	NO	YES	NO	NO	NO	98	66	83		25-34	17.0433
696	Cariango	Female	NO	Kimbundu	Scondary education I cycle	NO	No	NO	YES	NO	NO	NO	NO	YES	YES	NO	NO	YES	NO	YES	NO	92	70	74		15-24	21.3675
697	Cariango	Male	NO	Kimbundu	Scondary education I cycle	NO	NO	NO	YES	NO	NO	YES	YES	YES	YES	YES	NO	YES	NO	NO	NO	85	52	90		25-34	14.9568
698	Cariango	Female	NO	Bacongo	Scondary education I cycle	NO	NO	NO	YES	NO	NO	NO	NO	YES	YES	NO	NO	NO	NO	YES	NO	108	70		86	25-34	19.0311
699	Cariango	Male	NO	Kimbundu	Scondary education I cycle	NO	Yes, sometimes	NO	YES	NO	YES	YES	NO	YES	NO	YES	NO	NO	YES	NO	NO	170	67		85	25-34	19.6072
700	Cariango	Male	NO	Kimbundu	Primary education	NO	Yes, sometimes	NO	YES	NO	NO	YES	NO	YES	NO	YES	NO	NO	YES	NO	NO	135	72		94	35-44	17.4747
701	Cariango	Female	NO	Umbundo	Primary education	NO	No	NO	YES	NO	YES	YES	YES	YES	YES	YES	NO	YES	YES	YES	NO	91	55		103	15-24	16.2031
702	Cariango	Male	NO	Kimbundu	Primary education	NO	Yes, sometimes	NO	YES	nO	NO	YES	YES	YES	NO	YES	YES	NO	YES	NO	NO	106	48	100		35-44	17.0562
703	Cariango	Female	NO	Kimbundu	Primary education	NO	No	NO	YES	NO	NO	YES	NO	NO	NO	YES	NO	NO	NO	NO	NO	135	82		109	15-24	21.4903
704	Cariango	Female	NO	Kimbundu	Illiterate	NO	No	NO	YES	YES	NO	NO	YES	NO	YES	YES	YES	NO	NO	NO	NO	132	84		87	45-54	22.3478
705	Cariango	Male	NO	Kimbundu	Scondary education I cycle	YES	Yes, everyday	NO	YES	NO	YES	YES	NO	YES	YES	YES	NO	NO	NO	NO	NO	95	59		140	35-44	18.5078
706	Cariango	Male	NO	Kimbundu	Primary education			NO	YES	NO	YES	YES	NO	YES	NO	YES	NO	NO	NO	NO	NO	128	82		105	25-34	17.1029
707	Cariango	Male	NO	Kimbundu	Scondary education I cycle	NO	No	NO	NO	NO	NO	NO	NO	YES	NO	YES	YES	YES	YES	NO	NO	136	81		101	45-54	21.9364
708	Cariango	Male	NO	Kimbundu	Primary education	NO	Yes, sometimes	YES	YES	NO	YES	NO	NO	YES	NO	YES	YES	YES	NO	NO	NO	122	93		73	35-44	15.0204
709	Cariango	Male	NO	Kimbundu	Primary education	YES	Yes, sometimes	YES	YES	NO	YES	YES	YES	YES	NO	NO	NO	NO	YES	YES	NO	106	71		81	25-34	18.4425
710	Cariango	Female	NO	Umbundo	Illiterate	NO	No	NO	YES	NO	NO	YES	YES	YES	NO	YES	NO	NO	NO	YES	NO	103	69		83	55+	23.3377
711	Cariango	Female	NO	Kimbundu	Secondary education II cycle	NO	No	NO	YES	NO	YES	YES	YES	YES	NO	NO	NO	NO	NO	YES	NO	131	85		92	25-34	17.4044
712	Cariango	Female	NO	Kimbundu	Primary education	NO	No	NO	NO	NO	YES	YES	NO	YES	YES	NO	NO	NO	NO	YES	NO	105	67		98	35-44	16.0231
713	Cariango	Female	NO	Kimbundu	Primary education	NO	No	YES	YES	NO	YES	YES	YES	NO	YES	YES	NO	YES	YES	YES	NO	121	73		83	35-44	22.6409
714	Cariango	Female	NO	Kimbundu	Primary education	NO	No	NO	YES	NO	YES	NO	YES	YES	NO	YES	NO	YES	YES	NO	NO	96	65		78	25-34	20.1951
715	Cariango	Female	NO	Kimbundu	Primary education	YES	Yes, sometimes	NO	YES	NO	YES	YES	YES	YES	NO	YES	NO	YES	YES	NO	YES	91	60		123	25-34	15.6986
716	Cariango	Female	NO	Kimbundu	Illiterate	NO	No	YES	YES	NO	NO	NO	NO	NO	YES	YES	NO	NO	NO	YES	NO	132	67		86	55+	15.4006
717	Cariango	Female	NO	kimbundu	Scondary education I cycle	NO	Yes, sometimes	NO	YES	NO	YES	YES	NO	YES	YES	YES	NO	NO	NO	YES	NO	93	59		82	25-34	22.7615
718	Cariango	Male	NO	Umbundo	Illiterate	YES	Yes, sometimes	NO	YES	NO	YES	YES	YES	YES	YES	YES	YES	NO	NO	YES	NO	100	62		89	25-34	17.1875
719	Cariango	Male	NO	kimbundu	Scondary education I cycle	NO	No	NO	YES	NO	NO	YES	YES	YES	NO	YES	NO	NO	NO	YES	NO	122	78		98	15-24	18.6709
720	Cariango	Female	NO	kimbundu	Scondary education I cycle	NO	No	NO	YES	YES	NO	YES	YES	YES	YES	YES	YES	NO	NO	NO	NO	98	75		81	15-24	20.6852
721	Cariango	Female	NO	kimbundu	Secondary education II cycle	NO	Yes, sometimes	NO	YES	NO	NO	NO	YES	YES	YES	YES	NO	YES	NO	YES	NO	107	67		80	15-24	21.7784
722	Cariango	Male	NO	Kimbundu	Scondary education I cycle	NO	No	NO	YES	YES	NO	YES	NO	YES	NO	YES	YES	NO	YES	NO	YES	149	90		157	45-54	17.3134
723	Cariango	Female	NO	kimbundu	Secondary education II cycle	NO	Yes, sometimes	NO	YES	NO	yES	YES	YES	YES	YES	YES	YES	NO	NO	YES	NO	93	58		95	25-34	26.0375
724	Cariango	Female	NO	kimbundu	Secondary education II cycle	NO	NO	YES	YES	NO	yES	YES	YES	NO	YES	YES	NO	YES	YES	YES	NO	115	76		97	25-34	21.7192
725	Cariango	Male	NO	Other	Scondary education I cycle	NO	NO	NO	yES	NO	NO	NO	NO	YES	NO	NO	YES	YES	YES	YES	NO	102	47		63	15-24	16.0732
726	Cariango	Male	NO	Other	Primary education	NO	Yes, sometimes	NO	YES	NO	NO	YES	YES	YES	YES	YES	YES	YES	YES	YES	NO	99	61		88	25-34	15.2416
727	Cariango	Male	NO	kimbundu	Secondary education II cycle	NO	NO	NO	YES	NO	YES	NO	NO	YES	YES	YES	YES	YES	YES	NO	NO	115	79		114	25-34	17.9931
728	Cariango	Female	NO	kimbundu	Illiterate	NO	No	NO	YES	NO	YES	YES	YES	YES	YES	YES	YES	YES	YES	YES	YES				110	55+	42.6792
729	Cariango	Male	YES	kimbundu	Scondary education I cycle	NO	No	YES	YES	NO	YES	YES	NO	YES	YES	YES	NO	YES	NO	YES	NO	136	94		139	45-54	19.4126
730	Cariango	Female	NO	Kimbundu	Illiterate	NO	Yes, sometimes	NO	NO	NO	YES	YES	YES	YES	NO	YES	NO	YES	YES	YES	YES	118	70		104	25-34	19.8141
731	Cariango	Female	NO	Kimbundu	Illiterate	NO	No	NO	YES	NO	YES	YES	YES	NO	YES	YES	NO	NO	NO	YES	YES	166	106		89	45-54	29.0175
732	Cariango	Male	NO	Umbundo	University	NO	Yes, sometimes	NO	YES	YES	YES	YES	NO	YES	YES	YES	NO	YES	YES	YES	NO				72	25-34	20.0796
733	Cariango	Female	NO	Kimbundu	Primary education	NO	Yes, sometimes	NO	YES	YES	YES	NO	NO	YES	YES	YES	YES	YES	NO	NO	NO	105	71		86	35-44	18.75
734	Cariango	Male	NO	Kimbundu	Primary education	NO	No	NO	YES	NO	NO	NO	YES	YES	YES	NO	YES	YES	NO	NO	NO	128	86		89	25-34	15.7785
735	Cariango	Female	NO	Kimbundu	Primary education	NO	Yes, sometimes	NO	YES	NO	YES	YES	YES	YES	YES	NO	YES	YES	NO	YES	NO	135	96		94	45-54	28.7412
736	Cariango	Female	NO	Kimbundu	Illiterate	NO	No	NO	NO	NO	YES	NO	YES	YES	YES	NO	YES	YES	NO	YES	NO	114	74		105	55+	16.0102
737	Cariango	Female	NO	Kimbundu	Scondary education I cycle	NO	No	NO	NO	NO	NO	NO	YES	YES	NO	NO	NO	NO	NO	YES	NO	94	57		96	15-24	18.6966
738	Cariango	Female	YES	Kimbundu	Illiterate	NO	No	YES	YES	NO	NO	NO	NO	YES	YES	NO	NO	YES	NO	YES	NO	145	79		85	55+	17.827
739	Cariango	Female	NO	Kimbundu	Primary education	NO	Yes, sometimes	NO	YES	NO	YES	NO	NO	YES	YES	YES						96	65		68	25-34	21.0517
740	Cariango	Female	NO	Kimbundu	Scondary education I cycle	NO	NO	NO	YES	NO	YES	YES	YES	YES	YES	YES						127	66		73	25-34	18.0802
741	Cariango	Male	NO		Scondary education I cycle	NO	NO	NO	YES	YES	YES	YES	YES	YES	YES	YES								97		45-54
742	HDP	Female	NO	Kimbundu	Primary education	NO	NO	NO	YES	NO	YES	YES	NO	YES	YES	YES	YES	NO	NO	YES	NO	103	72	96		15-24	18.0802
743	HDP	Male	NO	Kimbundu	Scondary education I cycle	NO	NO	NO	YES	NO	NO	YES	NO	YES	NO	YES	YES	YES	YES	NO	NO	116	58	74		25-34	17.0993
744	HDP	Male	NO	Kimbundu	Scondary education I cycle	YES	Yes, everyday	NO	YES	NO	NO	NO	NO	YES	YES	NO	NO	NO	NO	YES	NO	72	51	67		35-44	15.7038
745	HDP	Male	NO	Other	Secondary education II cycle	YES	Yes, everyday	NO	YES	NO	YES	NO	YES	YES	NO	NO	NO	YES	NO	NO	NO	90	59		88	35-44	19.0311
746	HDP	Male	NO	Kimbundu	Primary education	NO	Yes, sometimes	YES	YES	NO	YES	NO	YES	YES	NO	NO	NO	YES	YES	NO	NO			107		55+
747	HDP	Female	NO	Kimbundu	Illiterate	NO	NO	NO	YES	YES	NO	YES	NO	YES	NO	NO	NO	NO	NO	YES	YES	127	83		90	55+	20.7511
748	HDP	Male	NO	Kimbundu	Secondary education II cycle	NO	NO	YES	YES	NO	YES	NO	NO	YES	NO	NO	NO	NO	NO	YES	NO	121	67	99		15-24	22.3757
749	HDP	Male	NO	Bacongo	University	NO	No	NO	YES	NO	YES	YES	NO	YES	YES	NO	NO	NO	NO	YES	NO	107	71	100		15-24	17.5419
750	HDP	Female	NO	Bacongo	Secondary education II cycle	NO	No	NO	YES	NO	YES	YES	NO	YES	YES	NO	NO	YES	NO	YES	NO	90	50	104		15-24	14.0777
751	HDP	Male	NO	Bacongo	Primary education	YES	Yes, sometimes	NO	YES	NO	YES	YES	NO	YES	NO	NO	NO	YES	NO	NO	NO	113	75	92		45-54	23.5078
752	HDP	Male	NO	Kimbundu	Scondary education I cycle	NO	No	NO	YES	YES	YES	YES	YES	YES	YES	YES	NO	YES	NO	YES	NO	90	60		71	15-24	12.7961
753	HDP	Female	NO	Kimbundu	Secondary education II cycle	NO	No	NO	NO	NO	NO	NO	YES	NO	NO	NO	NO	NO	NO	YES	NO	98	59		114	45-54	18.873
754	HDP	Female	NO	Kimbundu	Primary education	NO	No	NO	YES	NO	YES	YES	NO	YES	YES	NO	NO	YES	YES	YES	NO			77		25-34	18.3661
756	HDP	Male	NO	Umbundo	Scondary education I cycle	NO	No	NO	YES	NO	NO	NO	NO	YES	YES	NO	NO	NO	NO	YES	NO	95	56		75	15-24	18.1086
757	HDP	Male	NO	Bacongo	Scondary education I cycle	NO	No	NO	YES	NO	YES	YES	NO	YES	NO	NO	NO	NO	YES	YES	NO	99	50	91		25-34	16.3364
758	HDP	Male	NO	Bacongo	University	NO	No	NO	YES	NO	NO	NO	NO	YES	YES	YES	YES	YES	YES	YES	NO			105		45-54	16.5292
759	HDP	Male	NO	Kimbundu	Scondary education I cycle	NO	No	YES	YES	NO	NO	NO	NO	YES	YES	YES	NO	YES	YES	NO	NO	138	65	99		35-44	18.7783
760	HDP	Male	NO	Kimbundu	Secondary education II cycle	NO	No	NO	YES	NO	NO	NO	NO	YES	NO	YES	NO	YES	NO	NO	NO	104	66	125		15-24	17.6731
761	HDP	Male	NO	Kimbundu	Scondary education I cycle	NO	No	NO	YES	NO	YES	NO	NO	YES	YES	YES	YES	YES	YES	YES	NO		71	84		25-34	19.7704
762	HDP	Female	NO	Kimbundu	Illiterate	NO	Yes, sometimes	NO	YES	NO	YES	NO	NO	NO	YES	YES	YES	NO	YES	YES	NO	120	65	257		55+
763	HDP	Male	YES	Umbundo	Secondary education II cycle	NO	No	NO	YES	NO	YES	YES	NO	YES	YES	NO	NO	YES	NO	YES	NO	107	52	121		25-34	18.75
764	HDP	Male	NO	Kimbundu	Secondary education II cycle	YES	Yes, sometimes	NO	YES	NO	YES	YES	NO	YES	NO	NO	NO	YES	NO	NO	NO	108	70	115		25-34	19.4734
765	HDP	Female	NO	Bacongo	Secondary education II cycle	NO	No	NO	YES	NO	YES	YES	NO	NO	NO	NO	YES	YES	YES	YES	NO	107	69	105		15-24	22.2063
766	HDP	Male	NO	Kimbundu	Scondary education I cycle	YES	Yes, sometimes	NO	YES	YES	YES	YES	NO	NO	YES	NO	YES	NO	NO	YES	NO	134	77	146		35-44	20.3223
767	HDP	Male	NO	Umbundo	University	NO	No	NO	YES	NO	NO	NO	NO	YES	NO	NO	YES	NO	NO	YES	NO	103	60	72		25-34	19.1001
768	HDP	Male	NO	kimbundu	Scondary education I cycle	NO	No	NO	YES	YES	NO	NO	NO	NO	NO	NO	NO	NO	NO	YES	NO	115	60	100		15-24	17.0325
769	HDP	Female	YES	Bacongo	Scondary education I cycle	NO	No	NO	YES	NO	NO	NO	YES	NO	NO	YES	NO	NO	YES	YES	NO	106	64	256		35-44	18.9164
770	HDP	Male	NO	kimbundu	Scondary education I cycle	YES	Yes, sometimes	YES	YES	NO	yES	YES	NO	YES	YES	NO	NO	NO	YES	YES	NO	98	76	100		55+	16.7488
771	HDP	Female	NO	kimbundu	Scondary education I cycle	NO	NO	YES	YES	NO	NO	YES	NO	NO	NO	NO	NO	NO	YES	YES	NO	90	65		94	45-54	21.7784
772	HDP	Male	NO	Bacongo	Secondary education II cycle	YES	Yes, sometimes	NO	YES	NO	yES	YES	NO	YES	NO	NO	NO	YES	NO	YES	NO	99	63		77	35-44	18.4013
773	HDP	Female	NO	kimbundu	Illiterate	NO	Yes, sometimes	NO	YES	NO	yES	YES	NO	YES	YES	NO	NO	YES	NO	YES	NO	95	62		94	35-44	17.313
774	HDP	Male	NO	kimbundu	Primary education	NO	Yes, sometimes	YES	YES	NO	yES	YES	NO	YES	YES	NO	NO	NO	NO	YES	NO	128	46		70	55+	16.6933
775	HDP	Female	NO	kimbundu	Primary education	NO	NO	YES	yES	NO	YES	YES	NO	YES	YES	NO	NO	NO	NO	YES	NO	100	60		70	15-24	14.6667
776	DAT	Male	NO	Other	Secondary education II cycle	NO	Yes, sometimes	YES	YES	YES	YES	YES	YES	YES	NO	YES	YES	YES	YES	YES	NO	98	80		104	25-34	20.9572
777	DAT	Female	NO	kimbundu	Illiterate	NO	NO	NO	YES	NO	YES	YES	YES	YES	YES	YES	YES	YES	YES	YES	NO	121	80			45-54
778	DAT	Female	NO	Other	Scondary education I cycle	NO	No	YES	YES	NO	YES	YES	YES	YES	YES	YES	YES	YES	YES	YES	NO	135	89		97	45-54	20.0288
779	DAT	Female	NO	Other	University	NO	No	YES	YES	NO	YES	YES	YES	YES	YES	YES	YES	YES	YES	YES	NO	123	90		121	25-34	19.6052
780	DAT	Female	NO	Kimbundu	Primary education	NO	No	YES	YES	NO	YES	YES	YES	YES	YES	YES	YES	YES	YES	YES	NO	124	71		70	25-34	16.8889
781	DAT	Female	NO	Kimbundu	Primary education	NO	No	YES	YES	NO	YES	YES	YES	YES	YES	YES	YES	YES	YES	YES	NO	138	92		92	45-54	36
782	DAT	Male	NO	Other	Scondary education I cycle	NO	No	NO	YES	YES	YES	YES	YES	YES	YES	YES	YES	YES	YES	YES	NO	109	78		90	25-34	23.5294
783	DAT	Male	NO	Other	Scondary education I cycle	NO	No	NO	YES	YES	YES	YES	YES	YES	YES	YES	YES	YES	YES	YES	NO	114	72		81	25-34	21.9671
784	DAT	Female	NO	Umbundo	Primary education	NO	No	YES	YES	NO	YES	YES	YES	YES	NO	YES	YES	YES	YES	YES	NO	153	91		98	55+	24.1588
785	DAT	Female	NO	Other	University	NO	No	YES	YES	NO	YES	YES	YES	YES	YES	YES	YES	YES	YES	YES	NO	109	70		84	25-34	23.2335
786	DAT	Male	NO	Kimbundu	Secondary education II cycle	NO	No	YES	YES	YES	YES	YES	YES	YES	NO	YES	YES	YES	YES	YES	NO	109	52		80	25-34	19.5965
787	DAT	Female	NO	Umbundo	Primary education	NO	No	NO	YES	YES	YES	YES	YES	YES	YES	YES	YES	YES	YES	YES	NO	114	73		74	15-24	19.5556
788	DAT	Male	NO	Kimbundu	Secondary education II cycle	NO	No	YES	YES	YES	YES	YES	YES	YES	YES	YES	YES	YES	YES	YES	NO	113	88		90	25-34	44.4685
790	DAT	Female	NO	Kimbundu	Secondary education II cycle	NO	NO	YES	YES	YES	YES	YES	YES	YES	YES	YES	YES	YES	YES	YES	NO	105	65		94	45-54	25.3154
791	DAT	Male	NO	Umbundo	Primary education	NO	NO	YES	YES	NO	YES	YES	YES	YES	YES	YES	YES	YES	YES	YES	NO	109	55		84	25-34	18.75
792	DAT	Female	NO	Kimbundu	Secondary education II cycle	NO	NO	NO	YES	YES	YES	YES	YES	YES	YES	YES	YES	YES	YES	YES	NO	90	61		91	35-44	20.8889
793	DAT	Female	NO	Umbundo	Secondary education II cycle	NO	NO	YES	YES	YES	YES	YES	YES	YES	YES	YES	YES	YES	YES	YES	NO	122	67		82	35-44	22.8329
794	DAT	Male	NO	Other	Scondary education I cycle	NO	NO	YES	YES	NO	YES	YES	YES	YES	YES	YES	YES	YES	YES	YES	NO	120	87		94	35-44	28.075
1535	Cariango	Female	NO	Umbundo	Primary education	NO	Yes, sometimes	NO	NO	NO	YES	YES	NO	YES	YES	YES	YES	YES	YES	NO	YES	150	110			35-44	20.6131
796	DAT	Male	NO		Secondary education II cycle	NO	NO	NO	YES	NO	YES	YES	YES	YES	YES	YES	YES	YES	YES	YES	NO	167	103		89	55+	25.1486
797	DAT	Male	NO	Other	Secondary education II cycle	NO	NO	NO	YES	YES	YES	YES	YES	YES	YES	YES	YES	YES	YES	YES	NO	137	96		98	35-44	27.4348
798	DAT	Female	NO	Bacongo	Secondary education II cycle	NO	NO	NO	YES	YES	YES	YES	YES	YES	YES	YES	YES	YES	YES	YES	NO	98	51		71	25-34	19.563
799	DAT	Female	NO	Other	Secondary education II cycle	NO	Yes, sometimes	NO	YES	YES	YES	YES	YES	YES	YES	YES	YES	YES	YES	YES	NO	98	62		224	25-34	35.5556
800	DAT	Male	NO	Other	Secondary education II cycle	NO	No	YES	YES	NO	YES	YES	YES	YES	YES	YES	YES	YES	YES	YES	NO	132	86		118	35-44	19.3664
801	DAT	Female	NO	Umbundo	Secondary education II cycle	YES	No	YES	YES	NO	YES	YES	NO	YES	YES	NO	NO	NO	NO	YES	NO	95	53	75		25-34	20.3954
802	DAT	Male	NO	Kimbundu	Secondary education II cycle	YES	No	YES	YES	NO	NO	NO	NO	NO	NO	NO	YES	YES	YES	YES	NO	137	85		84	25-34	24.6094
803	DAT	Male	NO	Umbundo	Scondary education I cycle	NO	No	YES	YES	NO	YES	NO	NO	YES	NO	NO	NO	NO	NO	YES	NO	124	89	103		15-24	20.6575
804	DAT	Male	NO	Kimbundu	Secondary education II cycle	NO	Yes, sometimes	YES	YES	YES	YES	NO	NO	YES	NO	NO	NO	NO	NO	YES	NO	147	87	124		25-34	24.0569
805	DAT	Female	NO	Umbundo	Primary education	NO	No	YES	NO	NO	YES	NO	NO	YES	NO	NO	NO	NO	NO	YES	NO	165	92	95		35-44	42.7573
806	DAT	Male	NO	Kimbundu	Scondary education I cycle	NO	Yes, sometimes	YES	YES	NO	YES	NO	NO	YES	NO	NO	NO	NO	NO	YES	NO	122	79	84		25-34	21.3599
807	DAT	Female	NO	Kimbundu	Illiterate	NO	No	NO	YES	NO	YES	NO	NO	NO	NO	NO	NO	NO	NO	NO	YES	225	142	95		55+	26.7229
808	DAT	Male	YES	Bacongo	Secondary education II cycle	NO	No	NO	YES	NO	YES	YES	NO	YES	YES	YES	NO	YES	YES	NO	NO	130	80		103	55+	23.1472
809	DAT	Female	NO		Secondary education II cycle			NO	YES	NO	YES	NO	NO	NO	NO	NO	NO	NO	NO	NO	NO	128	66			25-34	17.7096
810	DAT	Male	NO	Kimbundu	Primary education	NO	Yes, sometimes	NO	YES	NO	YES	YES	NO	YES	YES	YES	YES	YES	NO	YES	NO	136	82		112	25-34	19.9432
811	DAT	Female	NO	Kimbundu	Illiterate	NO	No	NO	YES	YES	YES	NO	NO	NO	YES	YES	YES	YES	YES	YES	NO				58	35-44	14.2222
812	Cacuaco	Female	NO	Bacongo	Primary education	NO	No	NO	YES	NO	NO	YES	YES	YES	NO	YES	NO	NO	NO	NO	NO	97	65		96	25-34	19.2275
813	Cacuaco	Female	NO	Bacongo	Secondary education II cycle	NO	No	YES	YES	NO	YES	YES	YES	YES	YES	YES	NO	NO	NO	NO	NO	100	68		88	25-34	16.121
814	Cacuaco	Female	NO	Umbundo	Scondary education I cycle	NO	No	NO	YES	YES	YES	YES	NO	YES	YES	NO	NO	NO	NO	NO	NO	90	53		85	15-24	15.2038
815	Cacuaco	Female	NO	Umbundo	Scondary education I cycle	NO	No	NO	YES	NO	YES	NO	NO	YES	YES	NO	NO	NO	NO	NO	NO	96	66	85		15-24	15.6013
816	Cacuaco	Male	NO	Umbundo	Scondary education I cycle	NO	No	NO	YES	NO	NO	YES	NO	YES	NO	NO	NO	NO	NO	YES	NO	107	68		97	25-34	17.8612
817	Cacuaco	Male	NO	Bacongo	Scondary education I cycle	NO	Yes, sometimes	NO	YES	NO	NO	YES	YES	YES	NO	NO	NO	NO	NO	YES	NO	79	51		92	25-34	14.8789
818	Cacuaco	Male	NO	Other	Secondary education II cycle	NO	No	NO	NO	NO	NO	NO	YES	YES	NO	NO	YES	NO	NO	YES	NO	102	65		85	25-34	17.9827
819	Cacuaco	Male	NO	kimbundu	Primary education	NO	Yes, everyday	NO	YES	NO	yES	YES	YES	YES	YES	NO	NO	NO	NO	NO	NO	104	78		91	25-34	15.4321
820	Cacuaco	Male	NO	Umbundo	Scondary education I cycle	NO	NO	NO	YES	YES	yES	YES	YES	YES	YES	YES	NO	NO	NO	NO	NO	104	68		79	15-24	14.3426
821	Cacuaco	Male	NO	Bacongo	Primary education	NO	Yes, everyday	NO	YES	NO	yES	NO	YES	YES	NO	YES	NO	NO	NO	NO	NO	103	62		99	35-44	17.9982
822	Cacuaco	Male	NO	Bacongo	Primary education	YES	Yes, everyday	NO	YES	NO	yES	YES	YES	YES	YES	YES	NO	NO	NO	NO	NO	96	71		99	25-34	15.4833
823	Cacuaco	Female	NO	Bacongo	Primary education	NO	NO	NO	YES	YES	NO	NO	YES	YES	YES	NO	NO	NO	NO	NO	NO	107	71	84		25-34	17.1875
824	Cacuaco	Male	NO	Bacongo	Scondary education I cycle	NO	NO	YES	YES	NO	yES	YES	YES	NO	NO	YES	NO	NO	NO	NO	NO	102	65		110	45-54	18.6012
825	Cacuaco	Female	NO	Bacongo	Secondary education II cycle	NO	NO	NO	yES	NO	NO	NO	YES	YES	YES	NO	NO	NO	NO	NO	NO	119	76		101	15-24	17.1468
826	Cacuaco	Male	NO	kimbundu	Scondary education I cycle	YES	Yes, sometimes	NO	YES	NO	YES	NO	YES	YES	YES	YES	NO	NO	NO	NO	NO	99	68	131		35-44	19.2084
827	Cacuaco	Male	NO	Bacongo	University	NO	NO	NO	YES	NO	YES	NO	YES	YES	NO	YES	NO	NO	NO	NO	NO	99	63	138		25-34	17.9931
828	Cacuaco	Female	NO	Umbundo	Secondary education II cycle	NO	No	NO	YES	NO	YES	YES	YES	YES	YES	YES	NO	NO	NO	NO	NO	102	62	83		15-24	16.9563
829	Cacuaco	Male	NO	Umbundo	Primary education	NO	Yes, sometimes	NO	YES	NO	YES	YES	NO	NO	NO	NO	NO	NO	NO	NO	NO	61	45	200		45-54	14.2027
830	Cacuaco	Male	NO	Bacongo	Primary education	YES	Yes, sometimes	NO	NO	NO	YES	NO	NO	YES	NO	NO	NO	YES	NO	NO	NO		67	115		25-34	15.5896
831	Cacuaco	Female	NO	Other	Secondary education II cycle	NO	Yes, sometimes	NO	YES	NO	YES	NO	YES	YES	YES	YES	NO	YES	NO	NO	NO	110	81		134	25-34	20.1769
832	Cacuaco	Male	NO	Bacongo	Secondary education II cycle	NO	Yes, sometimes	NO	YES	YES	NO	NO	NO	NO	NO	YES	NO	NO	NO	NO	NO	108	69		101	15-24	15.4056
833	Cacuaco	Male	YES	Kimbundu	Scondary education I cycle	NO	No	YES	NO	NO	YES	NO	NO	NO	NO	NO	NO	NO	NO	NO	NO	96	59		65	15-24	17.7945
834	Cacuaco	Male	NO	Bacongo	Scondary education I cycle	NO	Yes, everyday	NO	YES	NO	NO	NO	YES	NO	YES	YES	NO	NO	YES	NO	NO	108	69		94	25-34	18.726
835	Cacuaco	Male	NO	Umbundo	Scondary education I cycle	YES	Yes, everyday	NO	YES	NO	NO	YES	NO	NO	NO	YES	NO	YES	NO	YES	NO	101	71		119	25-34	14.8789
836	Cacuaco	Female	NO	Kimbundu	Secondary education II cycle	NO	Yes, sometimes	NO	YES	NO	NO	NO	NO	YES	NO	YES	NO	YES	NO	NO	NO	101	67		106	25-34	18.7783
837	Cacuaco	Female	NO	Umbundo	Scondary education I cycle	NO	No	NO	NO	NO	YES	NO	NO	NO	NO	YES	NO	NO	NO	YES	NO	95	62		86	25-34	17.1875
838	DAT	Female	NO	Kimbundu	Illiterate	NO	No	NO	YES	NO	YES	YES	YES	YES	NO	YES	YES	YES	YES	YES	NO	98	55		103	55+
839	DAT	Female	NO		University		Yes, sometimes	YES	YES	NO	YES	NO	NO	YES	NO	YES	YES	YES	YES	YES	NO	118	96		80	35-44	21.6041
840	DAT	Female	NO	Kimbundu	Primary education	NO	NO	NO	YES	NO	YES	YES	YES	YES	YES	YES	YES	YES	YES	YES	YES	177	132		86	45-54	20.6612
841	DAT	Female	YES	Kimbundu	Scondary education I cycle	NO	NO	YES	YES	NO	YES	YES	YES	YES	NO	YES	YES	YES	YES	YES	YES	171	85		141	55+	33.7925
842	DAT	Female	NO	Umbundo	Primary education	NO	NO	YES	YES	YES	YES	YES	YES	YES	NO	YES	YES	YES	YES	YES	YES	153	96		223	45-54	28.0557
843	DAT	Female	NO	Kimbundu	Scondary education I cycle	NO	NO	NO	YES	NO	YES	NO	NO	NO	NO	NO	NO	NO	NO	NO		123	75		101	35-44
844	DAT	Female	NO	Kimbundu	Scondary education I cycle	NO	NO	YES	YES	NO	YES	NO	NO	YES	NO	NO	NO	NO	NO	YES	NO	115	76		129	15-24	19.1953
845	DAT	Female	NO	Kimbundu	Primary education	NO	Yes, sometimes	NO	YES	NO	YES	YES	NO	YES	YES	YES	NO	YES	NO	NO	NO	119	64		131	35-44	19.2234
846	DAT	Female	NO	Umbundo	Illiterate	NO	Yes, sometimes	NO	YES	NO	YES	YES	YES	NO	YES	YES	NO	YES	YES	YES	NO	77	60		132	15-24	17.7778
847	DAT	Female	NO	Bacongo	Primary education	NO	NO	NO	YES	YES	YES	YES	NO	YES	NO	YES	NO	YES	NO	YES	NO	98	56	131		25-34	17.3333
848	DAT	Female	NO	Kimbundu	Primary education	NO	NO	YES	YES	NO	YES	NO	NO	YES	NO	NO	NO	NO	NO	YES	NO	111	75		79	25-34	21.7865
849	DAT	Female	NO	Kimbundu	Secondary education II cycle	NO	No	NO	NO	NO	NO	NO	NO	YES	YES	YES	YES	YES	YES	YES	NO	95	70		71	15-24
850	DAT	Female	NO	Umbundo	Scondary education I cycle	NO	No	NO	NO	YES	YES	NO	YES	NO	NO	YES	NO	NO	NO	YES	NO	119	81		75	45-54	25.8761
851	DAT	Female	NO	Kimbundu	Secondary education II cycle	NO	No	NO	YES	YES	YES	YES	YES	YES	YES	YES	NO	YES	YES	NO	NO	84	51		59	25-34	21.3333
853	DAT	Female	NO	Umbundo	Primary education	NO	No	NO	YES	NO	YES	NO	NO	YES	NO	NO	NO	NO	NO	YES	NO	137	86	100		45-54	28.3987
854	DAT	Male	NO	Kimbundu	Scondary education I cycle	NO	No	NO	NO	NO	NO	NO	NO	NO	NO	NO	NO	NO	NO	NO	NO	105	65		92	15-24	37.2939
855	DAT	Female	NO	Kimbundu	Scondary education I cycle	NO	No	YES	YES	NO	YES	YES	NO	YES	YES	YES	YES	YES	YES	YES	NO	100	60		80	25-34	19.8141
856	DAT	Male	NO	Kimbundu	Scondary education I cycle	NO	No	NO	YES	NO	YES	YES	YES	YES	YES	YES	YES	YES	YES	YES	NO	92	53		75	15-24	17.4747
857	DAT	Male	NO	Kimbundu	Secondary education II cycle	YES	Yes, sometimes	NO	YES	NO	YES	YES	YES	YES	YES	YES	YES	NO	YES	YES	NO	97	57		130	15-24
858	DAT	Female	NO	Kimbundu	Scondary education I cycle	NO	Yes, sometimes	NO	YES	NO	YES	YES	NO	YES	YES	YES	YES	YES	YES	YES	NO	152	91		96	35-44	24.9503
859	DAT	Female	NO	Kimbundu	Scondary education I cycle	NO	No	YES	YES	NO	NO	NO	NO	YES	NO	NO	NO	NO	NO	NO	NO	117	76		81	15-24	24.5675
860	DAT	Female	NO	Umbundo	Secondary education II cycle	NO	No	YES	YES	NO	YES	YES	NO	YES	YES	YES	YES	YES	YES	YES	NO	126	82		96	35-44	24.1415
861	DAT	Female	NO	Kimbundu	Primary education	NO	No	YES	YES	YES	YES	YES	NO	YES	NO	YES	NO	NO	NO	NO	NO				94	25-34	15.4164
862	DAT	Female	NO	kimbundu		NO	No	YES	NO	NO	YES	NO	NO	YES	NO	NO	NO	NO	NO	YES	NO				117	55+	14.2222
863	DAT	Male	NO	Umbundo	Scondary education I cycle	NO	No	YES	YES	NO	YES	NO	NO	YES	NO	NO	YES	YES	YES	NO	NO	86	60		76	45-54	23.7253
864	DAT	Female	NO	Bacongo	Scondary education I cycle	NO	No	NO	YES	NO	YES	YES	YES	YES	YES	YES	NO	YES	NO	YES	NO	118	86		84	35-44	27.9421
865	DAT	Male	NO	kimbundu	Scondary education I cycle	NO	No	NO	YES	YES	YES	YES	NO	YES	YES	YES	YES	YES	YES	YES	NO	100	63		109	15-24	15.9675
866	DAT	Male	NO	kimbundu	Scondary education I cycle	YES	Yes, sometimes	YES	NO	NO	NO	NO	NO	YES	NO	NO	NO	NO	NO	NO	NO	111	70		89	55+	20.7031
867	DAT	Male	NO	kimbundu	Scondary education I cycle	NO	No	NO	YES	NO	yES	YES	YES	NO	YES	YES	NO	YES	YES	YES	NO	85	61		128	45-54	24.281
868	DAT	Female	NO	kimbundu	Primary education	NO	No	YES	YES	NO	yES	NO	NO	YES	NO	NO	NO	NO	NO	NO	NO	118	80		87	15-24	18.2222
869	DAT	Female	NO	kimbundu	Primary education	NO	NO	YES	YES	NO		NO	NO	NO	NO	NO	NO	NO	NO	YES	NO	100	64	87		35-44	25.721
870	DAT	Female	NO	kimbundu		NO	NO	YES	YES	NO	NO	NO	NO	YES	NO	NO	NO	NO	NO	YES	NO	110	68	75		55+	17.7778
871	DAT	Female	NO	kimbundu	Primary education	NO	NO	NO	YES	NO	NO	YES	YES	NO	NO	YES	NO	YES	NO	YES	NO	107	69		91	15-24	18.2222
872	DAT	Female	NO	kimbundu	Primary education	NO	Yes, sometimes	NO	YES	YES	yES	YES	NO	YES	YES	YES	YES	YES	YES	YES	NO	103	76		85	35-44	18.9619
873	DAT	Female	NO	kimbundu	Primary education	NO	NO	YES	YES	NO	NO	NO	NO	YES	NO	NO	NO	NO	NO	YES	NO	133	99		126	45-54	27.9421
874	DAT	Female	NO	kimbundu	Primary education	NO	NO	YES	YES	NO	yES	NO	NO	YES	NO	NO	NO	NO	NO	YES	NO	117	66	111		25-34	18.2222
875	DAT	Male	NO	kimbundu	Secondary education II cycle	NO	NO	YES	yES	NO	YES	NO	NO	YES	NO	NO	NO	NO	YES	YES	NO	113	74		78	15-24	21.2279
876	DAT	Male	NO	Umbundo	Scondary education I cycle	NO	Yes, sometimes	YES	YES	NO	YES	NO	NO	NO	NO	NO	NO	NO	NO	NO	NO	159	104	108		35-44	30.0621
877	DAT	Male	NO	Kimbundu	Primary education	NO	Yes, sometimes	YES	NO	NO	NO	NO	NO	YES	NO	NO	NO	NO	NO	YES	NO	153	91	101		55+	32.4547
878	DAT	Male	NO	Other	University	NO	No	YES	NO	YES	YES	YES	YES	YES	YES	YES	YES	YES	YES	YES	NO	135	88		83	25-34	30.4367
879	DAT	Female	NO	Kimbundu	Scondary education I cycle	NO	No	YES	NO	NO	YES	NO	NO	YES	NO	NO	NO	NO	NO	YES	NO	104	85		88	25-34	22.0741
880	HDP	Male	NO	Bacongo	Scondary education I cycle	NO	Yes, sometimes	NO	YES	NO	YES	YES	NO	NO	YES	NO	NO	NO	YES	YES	NO	79	52	118		15-24	14.8914
881	HDP	Male	NO	Bacongo	Scondary education I cycle	YES	Yes, sometimes	NO	YES	NO	YES	YES	NO	YES	YES	NO	NO	YES	NO	YES	NO	99	61	132		25-34	17.8565
882	HDP	Female	NO	Umbundo	Scondary education I cycle	NO	No	NO	YES	YES	NO	YES	NO	YES	NO	YES	NO	NO	NO	YES	NO	109	70	102		15-24	17.2635
883	HDP	Male	NO	Kimbundu	Scondary education I cycle	NO	Yes, sometimes	NO	YES	NO	YES	YES	NO	YES	NO	NO	NO	YES	YES	YES	NO	124	84	109		35-44	19.8178
884	HDP	Female	NO	Kimbundu	Primary education	NO	No	NO	YES	NO	YES	YES	NO	YES	YES	YES	NO	YES	YES	NO	NO	97	65	116		25-34	17.3465
885	HDP	Female	NO	Kimbundu	Scondary education I cycle	NO	No	NO	YES	NO	NO	YES	YES	YES	NO	NO	NO	NO	NO	YES	NO	90	55		107	15-24	16.0229
886	HDP	Male	NO	Bacongo	Primary education	YES	Yes, sometimes	NO	YES	NO	YES	NO	NO	YES	YES	NO	NO	NO	NO	YES	NO	107	58		99	35-44	16.1354
887	HDP	Female	NO	Bacongo	Secondary education II cycle	NO	No	NO	YES	NO	YES	NO	NO	NO	NO	YES	NO	NO	NO	NO	NO	122	82		95	15-24	16.0231
888	HDP	Female	NO	Bacongo	University	NO	No	NO	YES	NO	YES	YES	NO	YES	YES	NO	NO	NO	YES	YES	NO	100	52		88	25-34	17.9688
889	HDP	Male	NO	Bacongo	Scondary education I cycle	YES	Yes, sometimes	NO	YES	NO	YES	YES	NO	YES	YES	YES	YES	NO	YES	YES	NO	103	54	88		25-34	19.8413
890	HDP	Female	NO	Kimbundu	Scondary education I cycle	NO	Yes, sometimes	NO	YES	NO	YES	YES	NO	YES	NO	YES	NO	NO	YES	YES	YES	95	62		79	15-24
891	HDP	Male	NO	Kimbundu	Scondary education I cycle	NO	Yes, sometimes	NO	YES	YES	NO	NO	NO	YES	NO	YES	NO	NO	NO	YES	NO	103	67	74		15-24	15.8541
892	HDP	Female	NO	Kimbundu	University	NO	NO	NO	YES	NO	YES	YES	NO	YES	YES	NO	NO	NO	YES	YES	NO	113	83		75	25-34	16.0037
893	HDP	Female	NO	Kimbundu	Secondary education II cycle	NO	NO	NO	YES	NO	YES	NO	NO	NO	NO	NO	NO	NO	YES	YES	NO	129	90	91		35-44	25.7959
894	HDP	Male	NO	Kimbundu	Scondary education I cycle	YES	Yes, sometimes	NO	YES	NO	YES	YES	NO	YES	YES	NO	NO	NO	YES	YES	NO	84	58	113		35-44	17.7897
895	HDP	Male	NO	Kimbundu	Primary education	YES	Yes, sometimes	YES	YES	NO	YES	YES	NO	YES	YES	YES	YES	NO	NO	YES	NO	88	50	104		35-44	16.0037
896	HDP	Female	NO	Bacongo	Scondary education I cycle	NO	NO	YES	YES	NO	YES	NO	NO	YES	YES	NO	YES	NO	YES	YES	NO	100	62		63	15-24	19.3337
897	HDP	Male	NO	Kimbundu	Scondary education I cycle	YES	Yes, sometimes	YES	YES	NO	YES	YES	NO	YES	YES	NO	NO	YES	YES	YES	NO	110	69		75	15-24	17.1655
898	HDP	Female	NO	Bacongo	Primary education	NO	NO	YES	YES	NO	YES	YES	NO	YES	YES	NO	NO	YES	YES	YES	NO	98	67	127		35-44	24.8521
899	HDP	Male	NO	Kimbundu	Secondary education II cycle	NO	Yes, sometimes	NO	YES	YES	YES	NO	NO	YES	YES	NO	YES	NO	YES	YES	NO				133	45-54	13.7901
900	HDP	Male	NO	Kimbundu	Scondary education I cycle	NO	No	NO	YES	NO	YES	NO	NO	YES	NO	NO	NO	NO	NO	YES	NO	107	63		122	25-34	15.5489
901	HDP	Male	NO	Umbundo	Secondary education II cycle	NO	No	NO	NO	NO	NO	NO	NO	NO	NO	YES	NO	NO	NO	NO	NO	123	53		82	15-24	21.9713
902	HDP	Male	NO	Kimbundu	Primary education	YES	Yes, sometimes	NO	YES	NO	YES	NO	NO	YES	NO	NO	NO	NO	NO	NO	NO	87	63		109	35-44	16.9747
903	HDP	Male	YES	Kimbundu	Scondary education I cycle	NO	No	NO	YES	YES	YES	YES	NO	YES	NO	NO	NO	NO	NO	NO	NO	94	44	96		25-34
904	HDP	Male	NO	Kimbundu	Secondary education II cycle	YES	Yes, sometimes	NO	YES	NO	YES	YES	NO	YES	YES	NO	NO	YES	YES	YES	NO	110	70			25-34	18.6122
905	HDP	Female	NO	Kimbundu	Secondary education II cycle	NO	No	YES	YES	NO	YES	YES	NO	YES	YES	YES	NO	YES	YES	YES	NO	99	63		80	25-34	20.061
906	HDP	Male	NO	Kimbundu	Secondary education II cycle	NO	Yes, sometimes	YES	YES	NO	YES	YES	NO	YES	YES	NO	NO	YES	YES	YES	NO	107	62		87	15-24	16.2292
907	HDP	Male	NO	Kimbundu	Scondary education I cycle	YES	Yes, sometimes	YES	YES	NO	YES	YES	NO	YES	YES	YES	NO	YES	YES	YES	YES	122	61	157		15-24	18.0697
908	Cariango	Female	NO	Umbundo	Primary education	NO	No	YES	NO	NO	YES	YES	YES	NO	YES	NO	NO	NO	NO	NO	NO	166	74	90		25-34	29.5159
909	Cariango	Male	NO	Kimbundu	Primary education	NO	No	NO	YES	NO	YES	YES	NO	YES	YES	NO	NO	NO	YES	NO	NO	125	70		94	35-44	17.9901
910	Cariango	Male	NO	Kimbundu	Scondary education I cycle	YES	Yes, sometimes	NO	YES	NO	NO	YES	YES	YES	YES	YES	NO	NO	NO	NO	NO	110	76	100		25-34	24.3046
911	Cariango	Female	YES	Kimbundu	Illiterate	YES	Yes, sometimes	NO	NO	NO	NO	YES	NO	YES	YES	YES	YES	NO	NO	NO	NO					35-44
912	Cariango	Female	NO	kimbundu	Illiterate	NO	Yes, sometimes	NO	YES	NO	NO	YES	YES	NO	YES	NO	NO	NO	YES	NO	NO	122	86		90	35-44	27.0641
913	Cariango	Female	NO	kimbundu	Illiterate	NO	No	YES	YES	NO	NO	NO	NO	YES	YES	NO	NO	YES	NO	NO	NO	149	86		121	55+	28.6048
914	Cariango	Male	NO	Umbundo	Secondary education II cycle	NO	No	NO	YES	YES	YES	NO	YES	YES	YES	NO	YES	YES	NO	NO	NO	105	73	69		25-34	16.1247
915	Cariango	Male	NO	kimbundu	Scondary education I cycle	NO	Yes, sometimes	NO	YES	NO	YES	NO	YES	YES	NO	NO	NO	NO	NO	NO	NO	112	74		119	25-34	19.8177
916	Cariango	Male	NO	kimbundu	Scondary education I cycle	NO	No	NO	YES	NO	yES	NO	YES	YES	YES	NO	YES	NO	YES	YES	NO	94	64		100	25-34	19.3792
917	Cariango	Female	NO	kimbundu	Illiterate	NO	No	NO	YES	NO	NO	YES	YES	YES	NO	YES	NO	YES	YES	YES	NO	187	105		150	55+	24.3418
918	Cariango	Female	NO	kimbundu	Scondary education I cycle	NO	Yes, sometimes	NO	YES	NO	NO	YES	YES	YES	YES	YES	YES	YES	YES	NO	NO	92	61		91	25-34	11.7539
919	Cariango	Female	NO	kimbundu	Primary education	NO	Yes, sometimes	YES	YES	NO	NO	NO	YES	YES	YES	NO	YES	YES	YES	YES	YES	95	77		492	45-54	22.3133
920	Cariango	Female	NO	kimbundu	Primary education	NO	NO	YES	NO	NO	NO	NO	YES	NO	YES	NO	NO	NO	NO	YES	NO	106	74		92	35-44	33.2671
921	Cariango	Female	NO	Umbundo	Primary education	NO	NO	NO	YES	NO	NO	YES	NO	YES	YES	YES	NO	YES	NO	NO	NO	118	72		61	25-34	17.5431
922	Cariango	Male	NO	kimbundu	Scondary education I cycle	NO	Yes, sometimes	NO	YES	NO	yES	YES	YES	YES	YES	NO	YES	NO	YES	YES	NO	109	81		90	35-44	15.2439
923	Cariango	Female	NO	kimbundu	Scondary education I cycle	NO	Yes, sometimes	NO	YES	NO	NO	NO	NO	YES	YES	YES	NO	YES	YES	YES	NO	107	66		148	25-34	15.0597
924	Cariango	Female	NO	kimbundu	Illiterate	NO	NO	NO	YES	NO	yES	YES	YES	YES	YES	YES	NO	NO	YES	NO	NO	149	95		199	55+	23.3355
925	Cariango	Female	NO	kimbundu	Secondary education II cycle	NO	NO	NO	yES	YES	YES	NO	YES	YES	YES	YES	YES	YES	YES	YES	NO	108	61		72	15-24	18.9866
926	Cariango	Male	NO	Kimbundu	Secondary education II cycle	NO	Yes, sometimes	NO	YES	NO	YES	YES	YES	YES	YES	YES	NO	NO	YES	YES	NO	99	57		84	25-34	18.1154
927	Cariango	Female	NO	Kimbundu	Scondary education I cycle	NO	No	YES	YES	NO	YES	YES	NO	NO	YES	YES	NO	NO	YES	NO	YES	121	76		89	35-44	16.263
928	Cariango	Female	NO	Kimbundu	University	NO	No	YES	YES	NO	NO	NO	NO	NO	YES	NO	NO	YES	YES	NO	NO	81	81		71	35-44	18.4425
929	Cariango	Female	NO	Other	Primary education	NO	No	YES	YES	NO	YES	YES	YES	YES	YES	NO	NO	NO	YES	YES	NO	95	68		101	25-34	19.7055
930	Cariango	Male		Kimbundu	Secondary education II cycle	NO	No	YES	NO	NO	NO	YES	YES	YES	YES	NO	NO	NO	YES	YES	YES	90	59		84	55+
931	Cariango	Female	NO	Kimbundu	Illiterate	NO	No	NO	YES	NO	YES	NO	NO	YES	YES	NO	NO	YES	YES	NO	NO	148	67		81	55+	15.6046
932	Cariango	Female	NO	Kimbundu	Primary education	NO	No	YES	YES	NO	YES	YES	YES	NO	YES	YES	NO	NO	YES	YES	YES	166	100		93	45-54	18.75
933	Cariango	Female	NO	Kimbundu	Illiterate	NO	No	NO	YES	YES	YES	YES	YES	YES	YES	YES	NO	YES	YES	YES	YES	215	121		82	55+	27.1111
934	Cariango	Female	NO	Umbundo	Secondary education II cycle		No	NO	YES	NO	YES	YES	YES	YES	NO	YES	NO	NO	NO	YES	NO				87	25-34	22.9591
935	Cariango	Male	NO	Kimbundu	Scondary education I cycle	NO	No	NO	YES	NO	YES	NO	YES	YES	YES	NO	NO	NO	YES	NO	NO	105	62		92	25-34	18.1662
936	Cariango	Male	NO	Other	Secondary education II cycle	NO	Yes, sometimes	NO	YES	NO	NO	NO	NO	YES	YES	NO	YES	NO	NO	YES	NO	113	76		116	25-34	24.7676
937	Cariango	Male	NO	Kimbundu	Scondary education I cycle	NO	Yes, everyday	NO	YES	NO	NO	NO	NO	YES	YES	YES	YES	NO	NO	NO	NO	124	90		92	35-44
938	Cariango	Female	NO	Kimbundu	Primary education	NO	No	NO	YES	NO	NO	NO	NO	YES	NO	YES	NO	NO	YES	NO	NO				91	45-54	16.2331
939	Cariango	Male	NO	Kimbundu	Scondary education I cycle	NO	NO	NO	YES	NO	YES	YES	NO	YES	NO	YES	YES	NO	NO	YES	NO	117	84		78	25-34	18.8189
940	Cariango	Male	YES	Kimbundu	Primary education	YES	NO	NO	YES	NO	YES	YES	YES	YES	YES	YES	YES	NO	YES	NO	NO	98	64		78	35-44	20.0692
941	Cariango	Female	NO	Kimbundu	Primary education	NO	Yes, sometimes	NO	YES	YES	YES	YES	YES	YES	YES	YES	NO	NO	NO	YES	NO	121	89		90	35-44	16.8802
942	Cariango	Male	NO	Umbundo	Secondary education II cycle	NO	NO	NO	NO	NO	NO	NO	NO	YES	YES	YES	NO	NO	NO	NO	NO	116	74		87	25-34	22.3863
943	Cacuaco	Female	NO	Bacongo	Secondary education II cycle	NO	NO	NO	YES	NO	YES	NO	YES	YES	YES	NO	YES	NO	YES	NO	NO	133	88		136	35-44	27.102
944	Cacuaco	Female	NO	Bacongo	Secondary education II cycle	NO	NO	NO	YES	YES	YES	YES	YES	YES	YES	YES	YES	YES	NO	YES	NO	80	58		87	15-24	17.1563
945	Cacuaco	Male	NO	Bacongo	Scondary education I cycle	YES	Yes, sometimes	NO	YES	NO	NO	YES	YES	YES	YES	YES	YES	NO	NO	NO	NO	134	76		82	15-24	17.9931
946	Cacuaco	Female	NO	Kimbundu	Scondary education I cycle	NO	NO	NO	NO	NO	NO	NO	NO	YES	NO	NO	NO	NO	NO	NO	NO	85	54		77	15-24	19.1467
947	Cacuaco	Female	NO	Kimbundu	Primary education	NO	NO	NO	NO	NO	NO	NO	NO	YES	YES	NO	NO	NO	NO	NO	NO	101	65		83	15-24	16.0156
948	Cacuaco	Female	NO	Bacongo	Scondary education I cycle	NO	NO	NO	YES	YES	NO	YES	NO	YES	NO	YES	NO	NO	NO	NO	NO	87	57		87	25-34	18.4425
949	Cacuaco	Male	NO	Other	Scondary education I cycle	NO	No	NO	NO	NO	NO	NO	NO	NO	NO	NO	NO	YES	NO	NO	NO	112	56		86	15-24	17.5696
950	Cacuaco	Male	NO	Other	Scondary education I cycle	YES	Yes, sometimes	NO	YES	NO	NO	NO	YES	NO	NO	YES	YES	NO	YES	NO	NO	98	69		94	35-44
951	Cacuaco	Male	NO	Umbundo	Scondary education I cycle	NO	No	NO	NO	NO	NO	YES	NO	YES	NO	NO	YES	NO	NO	NO	NO	115	56		88	15-24	17.9982
952	Cacuaco	Male	NO	Bacongo	Scondary education I cycle	NO	No	NO	YES	NO	NO	YES	NO	YES	YES	YES	NO	NO	NO	NO	NO	134	85		106	45-54	20.8308
953	Cacuaco	Female	NO	Kimbundu	Scondary education I cycle	NO	No	NO	YES	NO	NO	YES	NO	YES	YES	NO	NO	NO	NO	NO	NO	103	64		67	15-24	16.2278
954	Cacuaco	Male	NO	Umbundo	Secondary education II cycle	NO	Yes, sometimes	NO	YES	NO	NO	YES	YES	YES	YES	YES	NO	NO	NO	NO	NO	90	65		94	25-34	15.9875
955	Cacuaco	Female	NO	Umbundo	Primary education	NO	No	YES	YES	NO	NO	NO	NO	YES	NO	YES	NO	NO	NO	NO	NO	104	67		109	25-34	21.2183
956	Cacuaco	Female	NO	Kimbundu	Illiterate	NO	Yes, sometimes	NO	YES	NO	YES	NO	YES	YES	YES	YES	NO	NO	NO	NO	NO	90	63		112	35-44	18.1312
957	Cacuaco	Female	NO	Umbundo	Illiterate	NO	No	NO	YES	NO	YES	YES	NO	YES	NO	NO	NO	NO	NO	NO	NO	86	58		76	25-34	13.6196
958	Cacuaco	Male	NO	Kimbundu	Primary education			NO	YES	NO	YES	YES	YES	NO	NO	NO	NO	NO	NO	NO	NO	88	57		95	35-44	16.456
959	Cacuaco	Male	NO	Bacongo	Illiterate	NO	No	NO	YES	NO	NO	NO	NO	YES	NO	NO	NO	NO	NO	NO	NO	127	85		115	25-34	20.202
960	Cacuaco	Male	NO	Bacongo	Scondary education I cycle	YES	Yes, everyday	YES	YES	NO	YES	NO	YES	YES	NO	YES	NO	NO	NO	NO	NO	114	70		133	35-44	16.9747
961	Cacuaco	Male	NO	Bacongo	Scondary education I cycle	YES	Yes, everyday	NO	NO	NO	YES	NO	YES	NO	NO	YES	NO	NO	YES	NO	NO	93	50		104	45-54	16.1354
963	DAT	Male	NO	kimbundu	Scondary education I cycle	NO	No	YES	NO	NO	YES	NO	NO	YES	NO	NO	NO	NO	NO	YES	NO	139	88		90	55+	26.079
964	DAT	Female	NO	kimbundu		NO	No	YES	YES	NO	YES	NO	NO	YES	NO	NO	NO	NO	NO	YES	NO	104	44	85		35-44	19.1111
965	DAT	Female	NO	kimbundu		NO	No	NO	YES	NO	YES	YES	YES	YES	YES	YES	YES	YES	YES	YES	NO	93	66		71	15-24	16.4236
966	DAT	Female	NO	kimbundu	Primary education	NO	No	NO	YES	NO	yES	NO	NO	YES	NO	NO	NO	NO	NO	YES	NO	120	74	89		25-34	23.634
967	DAT	Male	NO	kimbundu	Secondary education II cycle	NO	No	NO	YES	NO	yES	NO	NO	NO	NO	NO	NO	NO	NO	NO	NO	105	70		96	55+	27.5802
968	DAT	Female	NO	kimbundu	Secondary education II cycle	NO	NO	NO	YES	NO	yES	NO	NO	NO	NO	NO	NO	NO	NO	NO	NO	125	108	97		35-44	24.1115
969	DAT	Female	NO	kimbundu	Primary education	NO	NO	NO	YES	NO	yES	YES	NO	YES	YES	YES	YES	YES	YES	YES	YES	140	80		81	55+	23.8281
970	DAT	Male	NO	kimbundu	Secondary education II cycle	NO	Yes, sometimes	NO	NO	NO	NO	NO	NO	NO	NO	NO	NO	NO	NO	NO	NO	126	72		99	25-34	19.433
971	DAT	Female	NO	kimbundu	Secondary education II cycle	NO	NO	YES	YES	NO	yES	NO	NO	NO	NO	NO	NO	NO	NO	NO	NO	103	63		98	15-24	19.1406
972	DAT	Male	NO		Scondary education I cycle	NO	NO	NO	YES	NO	yES	NO	NO	NO	NO	NO	NO	NO	NO	NO	NO	67	63	126		35-44	17.0562
973	DAT	Male	NO	Umbundo	Scondary education I cycle	NO	NO	YES	YES	NO	yES	NO	NO	NO	NO	NO	NO	NO	NO	NO	NO	127	79		107	35-44	20.7613
974	DAT	Male	NO	kimbundu	Scondary education I cycle	YES	Yes, sometimes	NO	YES	NO	yES	NO	NO	NO	NO	NO	NO	NO	NO	NO	NO	87	86		113	35-44	16.6933
975	DAT	Female	NO		Illiterate	NO	NO	YES	NO	YES	NO	NO	NO	NO	NO	NO	NO	NO	NO	NO	NO	122	81		115	55+	21.3333
976	DAT	Female	NO	Kimbundu	Primary education	NO	No	NO	YES	NO	YES	NO	NO	YES	YES	YES	YES	YES	YES	YES	NO	243	180		122	25-34
977	DAT	Female	NO	Kimbundu	Primary education	NO	No	NO	YES	NO	YES	YES	NO	NO	YES	YES	YES	YES	YES	YES	NO	126	85		102	45-54	28.6689
978	DAT	Female	NO	Kimbundu	Primary education	YES	Yes, sometimes	NO	YES	NO	NO	YES	NO	NO	YES	YES	YES	YES	YES	YES	NO	111	79		86	25-34	17.3134
979	DAT	Male	NO	Bacongo	University	NO	Yes, sometimes	NO	NO	NO	NO	NO	NO	NO	NO	NO	NO	NO	NO	NO	NO	127	80		84	15-24	21.3839
980	DAT	Female	NO			NO	No	NO	YES	NO	YES	NO	NO	YES	NO	NO	NO	NO	NO	YES	NO	110	56	153		15-24	17.6254
981	DAT	Male	NO	Kimbundu	Primary education	YES	Yes, sometimes	YES	YES	NO	YES	YES	YES	YES	YES	YES	YES	YES	YES	YES	NO	123	64		194	35-44	15.6157
982	DAT	Female		Kimbundu	University	NO	Yes, sometimes	NO	YES	YES	YES	YES	YES	YES	YES	YES	YES	YES	YES	YES	NO	125	72		80	25-34	24.4444
983	DAT	Female	NO	Kimbundu	Primary education	NO	No	YES	YES	NO	YES	YES	YES	YES	YES	YES	YES	YES	YES	YES	NO	107	82		80	45-54	17.0874
984	DAT	Female		Kimbundu	Secondary education II cycle	NO	No	YES	YES	NO	YES	NO	NO	YES	NO	NO	YES	NO	NO	NO	NO	128	83	127		25-34	19.0677
985	DAT	Female	NO	Kimbundu	Illiterate	NO	No	NO	YES	YES	YES	YES	YES	YES	YES	YES	YES	YES	YES	YES	NO	171	104		70	25-34	19.1953
986	DAT	Female	YES	Kimbundu	Primary education	NO	No	YES	YES	YES	YES	YES	YES	YES	NO	YES	YES	YES	YES	YES	NO				175	55+	49.481
987	DAT	Male	NO	Kimbundu	Scondary education I cycle	NO	No	YES	YES	YES	YES	YES	YES	YES	YES	YES	YES	YES	YES	YES	NO	147	87		121	45-54	25.2174
988	DAT	Female	NO	Kimbundu	Primary education	NO	No	YES	YES	YES	YES	YES	YES	YES	NO	YES	YES	YES	YES	YES	NO	148	88		97	45-54	19.5682
989	DAT	Female	NO	Kimbundu	Scondary education I cycle	NO	NO	YES	YES	YES	YES	YES	YES	YES	YES	YES	YES	YES	YES	YES	NO	122	76		87	45-54	25.0762
990	HDP	Male	YES	Kimbundu	Secondary education II cycle	NO	NO	NO	YES	NO	YES	YES	YES	YES	YES	YES	NO	NO	YES	YES	NO	91	71	432		45-54	18.4672
991	HDP	Male	NO	Kimbundu	Secondary education II cycle	NO	NO	NO	NO	NO	YES	YES	NO	NO	NO	NO	NO	NO	NO	YES	NO	111	73		98	15-24	18.115
992	HDP	Male	NO	Umbundo	University	NO	NO	YES	YES	NO	YES	YES	NO	YES	YES	NO	NO	NO	NO	NO	NO	85	51	127		25-34	38.337
993	HDP	Female	NO	Umbundo	Primary education	NO	Yes, sometimes	YES	YES	NO	YES	YES	YES	YES	YES	YES	NO	NO	NO	YES	NO	112	67	129		55+	15.0597
994	HDP	Male	NO	Kimbundu	Scondary education I cycle	NO	NO	NO	NO	NO	NO	NO	NO	YES	NO	YES	NO	NO	YES	YES	NO	96	78	89		25-34	19.5354
995	HDP	Female	NO	Other	Primary education	NO	NO	NO	YES	NO	NO	NO	NO	YES	YES	YES	NO	NO	YES	YES	NO	89	68	88		45-54	19.563
996	HDP	Male	NO	Other	Scondary education I cycle	NO	NO	NO	YES	NO	NO	NO	NO	YES	NO	YES	NO	YES	NO	YES	NO	91	57	109		25-34	17.8465
997	HDP	Female	NO	Kimbundu	Scondary education I cycle	NO	NO	YES	YES	NO	YES	YES	NO	YES	YES	NO	NO	YES	NO	YES	NO	106	59		88	15-24	16.609
998	HDP	Male	NO	Kimbundu	Illiterate	NO	Yes, sometimes	YES	YES	YES	YES	NO	YES	NO	YES	YES	NO	YES	YES	YES	NO	96	46	138		55+	18.0802
999	HDP	Male	NO	Kimbundu	Illiterate	NO	No	NO	YES	NO	YES	YES	NO	YES	YES	YES	NO	NO	NO	YES	NO	60	50		101	15-24	15.2219
1000	HDP	Male	YES	Bacongo	Primary education	NO	No	NO	YES	NO	YES	YES	NO	YES	NO	NO	NO	NO	YES	NO	NO	119	50	106		35-44	23.4236
1001	HDP	Male	NO	Kimbundu	Primary education	YES	Yes, sometimes	NO	YES	NO	YES	YES	NO	YES	YES	YES	YES	YES	YES	YES	NO	70	60	82		25-34	12.5068
1002	HDP	Male	NO	Bacongo	Scondary education I cycle	YES	Yes, sometimes	NO	YES	NO	YES	YES	NO	YES	YES	NO	NO	NO	YES	YES	NO	95	65	96		45-54	23.1983
1003	HDP	Male	NO	Kimbundu	Secondary education II cycle	NO	No	NO	YES	YES	YES	NO	YES	YES	YES	NO	YES	YES	YES	YES	NO	93	58		79	25-34	18.8092
1004	HDP	Male	NO	Umbundo	Primary education	NO	yes	YES	YES	NO	NO	YES	NO	YES	YES	NO	NO	NO	YES	YES	NO	126	81	93		25-34	18.6709
1005	HDP	Male	NO	Kimbundu	Primary education	NO	Yes, sometimes	YES	YES	NO	YES	YES	NO	YES	YES	NO	NO	NO	YES	YES	NO	117	71	128		25-34	18.591
1006	HDP	Male	NO	Kimbundu	Scondary education I cycle	NO	No	NO	YES	NO	YES	YES	NO	YES	YES	NO	NO	NO	YES	YES	NO	107	57	156		15-24	19.4932
1007	HDP	Female	NO	Bacongo	Illiterate	NO	No	NO	YES	NO	YES	YES	NO	YES	YES	NO	NO	YES	YES	YES	NO	80	50	106		55+	14.1994
1008	HDP	Male	NO	Umbundo	Secondary education II cycle	NO	No	YES	YES	NO	YES	YES	NO	YES	NO	NO	NO	NO	YES	YES	NO	116	75	101		15-24	19.2672
1009	HDP	Female	NO	Umbundo	Primary education	NO	No	NO	YES	NO	YES	YES	NO	YES	YES	NO	NO	NO	YES	YES	NO	99	63		106	25-34	15.8059
1010	HDP	Male	NO	kimbundu	Primary education	NO	No	NO	YES	NO	YES	NO	NO	YES	YES	NO	NO	NO	YES	YES	NO	75	46		75	45-54	15.8187
1011	HDP	Male	NO	kimbundu	Secondary education II cycle	NO	No	NO	YES	NO	YES	NO	YES	YES	YES	NO	NO	NO	YES	YES	NO	103	65	110		25-34	17.9592
1012	HDP	Male	NO	kimbundu	Illiterate	NO	No	YES	NO	NO	NO	NO	YES	YES	NO	YES	YES	YES	YES	YES	NO	124	75		85	35-44	19.1406
1013	HDP	Male	NO	kimbundu	Primary education	NO	No	NO	YES	NO	NO	NO	NO	YES	YES	NO	NO	NO	YES	YES	NO	109	61		71	35-44	17.0935
1014	HDP	Male	NO	kimbundu	Scondary education I cycle	NO	No	NO	YES	NO	NO	NO	NO	YES	YES	YES	YES	YES	YES	YES	NO	150	92		83	35-44	21.0498
1015	HDP	Male	NO	Bacongo	Illiterate	NO	No	NO	YES	NO	YES	NO	NO	YES	YES	YES	NO	NO	NO	YES	NO	110	72		85	35-44	16.3304
1016	HDP	Female	NO	Other	Illiterate	NO	No	NO	YES	NO	NO	YES	NO	YES	YES	YES	YES	YES	YES	YES	NO	114	54		95	55+	17.7778
1017	HDP	Male	NO	kimbundu	Primary education	YES	Yes, sometimes	NO	YES	NO	yES	YES	NO	YES	YES	NO	YES	NO	NO	NO	NO	99	74		82	15-24	18.9619
1018	HDP	Male	YES	Bacongo	Scondary education I cycle	NO	NO	NO	YES	NO	NO	NO	YES	NO	NO	NO	YES	YES	YES	YES	NO	130	91		357	45-54	19.1512
1019	HDP	Female	NO	Other	Illiterate	NO	NO	NO	YES	YES	NO	NO	YES	YES	YES	YES	NO	YES	YES	YES	NO	99	62		92	35-44	16.2331
1020	HDP	Female	NO	Bacongo	Primary education	NO	NO	YES	YES	NO	yES	NO	YES	YES	YES	NO	NO	NO	NO	YES	NO	154	94		112	45-54	24.1415
1021	HDP	Male	NO	kimbundu	Scondary education I cycle	NO	Yes, sometimes	NO	YES	NO	yES	NO	NO	YES	YES	NO	NO	YES	NO	YES	NO	104	68		110	25-34	16.2177
1022	HDP	Male	NO	Umbundo	Scondary education I cycle	NO	NO	NO	YES	NO	NO	NO	YES	YES	NO	NO	YES	NO	YES	NO	NO	134	81	75		35-44	17.1563
1023	HDP	Male	NO	kimbundu	Scondary education I cycle	YES	Yes, sometimes	NO	YES	NO	yES	NO	NO	YES	NO	NO	NO	YES	YES	NO	NO	94	58		121	25-34	16.6525
1024	Cacuaco	Male	NO	kimbundu	Scondary education I cycle	YES	Yes, everyday	NO	YES	NO	NO	YES	YES	YES	NO	NO	NO	NO	NO	NO	NO	123	96		80	35-44	18.5132
1025	Cacuaco	Female	NO	Umbundo	Illiterate	NO	NO	NO	NO	NO	NO	NO	YES	NO	NO	NO	YES	NO	NO	NO	NO	94	71		82	25-34	26.7759
1026	Cacuaco	Female	NO	Bacongo	Scondary education I cycle	NO	No	NO	YES	YES	NO	NO	YES	NO	NO	YES	NO	NO	NO	NO	NO	116	67		89	15-24	20.6193
1027	Cacuaco	Female	NO	Kimbundu	Primary education	NO	No	NO	YES	NO	NO	YES	YES	YES	YES	YES	NO	NO	NO	YES		80	53		107	45-54	15.8221
1028	Cacuaco	Male	NO	Kimbundu	Secondary education II cycle	NO	No	NO	YES	NO	NO	NO	NO	YES	NO	YES	NO	NO	NO	NO	NO	110	65		102	15-24	19.6072
1029	Cacuaco	Female	NO	Bacongo	Illiterate	NO	No	NO	YES	NO	YES	YES	YES	YES	YES	YES	NO	NO	NO	NO	NO	90	59		80	25-34	15.9439
1030	Cacuaco	Female	NO	Kimbundu	Illiterate	NO	No	NO	YES	NO	YES	NO	YES	NO	YES	YES	YES	NO	NO	NO	NO	209	100		149	55+	22.8624
1031	Cacuaco	Male	NO	Umbundo	Primary education	YES	Yes, everyday	NO	YES	NO	NO	YES	YES	YES	NO	NO	NO	NO	NO	YES	NO	105	72		103	35-44	17.301
1032	Cacuaco	Male	NO	Kimbundu	Secondary education II cycle	YES	Yes, sometimes	NO	YES	NO	NO	NO	YES	YES	YES	YES	YES	NO	NO	YES	NO	93	74		92	15-24	18.8121
1033	Cacuaco	Male	NO	Umbundo	Scondary education I cycle	YES	Yes, sometimes	NO	YES	NO	YES	YES	NO	YES	NO	NO	NO	NO	NO	YES	NO	118	68		115	25-34	19.5354
1034	DAT	Female	NO	Kimbundu	Scondary education I cycle	NO	No	NO	YES	YES	YES	YES	YES	YES	YES	YES	YES	YES	YES	YES	YES	163	95		90	35-44	32.526
1035	DAT	Female	NO	Umbundo	Illiterate	NO	No	NO	YES	YES	YES	NO	YES	YES	NO	YES	YES	YES	YES	YES	NO	135	84		144	45-54	31.25
1036	DAT	Female	YES	Kimbundu	Scondary education I cycle	NO	No	YES	NO	NO	YES	NO	NO	YES	NO	NO	NO	NO	NO	YES	NO	130	72	101		35-44	21.6713
1037	DAT	Male	NO	Kimbundu	Secondary education II cycle	NO	No	NO	YES	NO	YES	NO	NO	NO	NO	NO	NO	YES	NO	NO	NO	105	68	72		25-34	18.2099
1038	DAT	Male	NO	Kimbundu	Scondary education I cycle	NO	No	NO	YES	NO	YES	NO		NO	NO	NO		NO	NO	NO	NO	114	63		80	15-24	17.9982
1039	DAT	Female	NO	Kimbundu	Primary education	NO	Yes, sometimes	NO	YES	NO	YES	NO	NO	YES	YES	YES	YES	YES	YES	YES	NO	108	68		98	45-54	21.7778
1040	DAT	Female	NO	Kimbundu	Primary education	NO	NO	NO	YES	NO	YES	YES	YES	YES	YES	YES	YES	YES	YES	YES	NO	98	64		90	25-34	16.8242
1041	DAT	Male	NO	Kimbundu	Secondary education II cycle	NO	NO	NO	YES	NO	YES	NO	YES	YES	YES	YES	YES	YES	YES	YES	NO	118	85		79	15-24
1042	DAT	Female	NO	Kimbundu	Scondary education I cycle	NO	Yes, sometimes	NO	YES	NO	YES	NO	NO	YES	YES	YES	NO	NO	YES	YES	NO	133	81		90	35-44	20.5191
1043	DAT	Female	NO	Kimbundu	Secondary education II cycle	NO	NO	YES	YES	NO	YES	YES	YES	YES	YES	YES	NO	NO	NO	YES	NO	77	43		87	15-24
1044	DAT	Female	NO	Kimbundu	Secondary education II cycle	NO	NO	NO	YES	NO	YES	YES	NO	YES	YES	YES	YES	YES	YES	YES	NO	97	53		72	15-24
1045	DAT	Male	NO	Kimbundu	Secondary education II cycle	NO	Yes, sometimes	NO	YES	NO	YES	YES	YES	YES	NO	YES	YES	YES	NO	NO	NO	146	86		90	25-34	28.125
1046	DAT	Male	NO	Kimbundu	Scondary education I cycle	NO	Yes, sometimes	NO	YES	NO	NO	YES	YES	YES	YES	YES	NO	NO	NO	YES	NO	138	88		97	25-34	19.1406
1047	DAT	Male	NO	Kimbundu	Scondary education I cycle	NO	NO	YES	YES	NO	YES	YES	YES	YES	YES	NO	YES	YES	NO	YES	NO	153	90		95	45-54	19.9573
1048	DAT	Male	NO	Umbundo	Primary education	NO	Yes, sometimes	YES	YES	YES	YES	YES	YES	YES	YES	YES	YES	NO	YES	YES	NO	117	66		187	35-44	17.6471
1049	DAT	Female	NO	Kimbundu	Primary education	NO	No	NO	YES	NO	YES	NO	NO	YES	YES	YES	NO	NO	NO	NO	NO	160	87		142	55+	23.5078
1050	DAT	Female	NO	Kimbundu	Secondary education II cycle	NO	Yes, sometimes	YES	YES	NO	YES	YES	YES	YES	YES	YES	YES	YES	YES	YES	NO	119	77		70	25-34	16.955
1051	DAT	Male	NO	Umbundo	Primary education	NO	Yes, sometimes	NO	YES	NO	YES	NO	NO	YES	YES	YES	YES	YES	NO	NO	NO	130	85		114	35-44	23.0469
1052	DAT	Female	NO	Kimbundu		NO	No	NO	YES	NO	YES	NO	NO	NO	NO	NO	NO	NO	NO	NO	NO	92	66		108	25-34	16.6933
1053	DAT	Male	NO	Bacongo	Scondary education I cycle	NO	No	NO	YES	NO	YES	NO	NO	NO	NO	NO	NO	NO	NO	NO	NO	129	86		104	35-44	19.5918
1054	DAT	Female	NO	Kimbundu	Scondary education I cycle	NO	No	YES	YES	YES	YES	YES	YES	YES	YES	YES	YES	YES	YES	YES	NO	134	81		98	55+	18.6851
1055	DAT	Male	NO	Kimbundu	Secondary education II cycle	NO	No	YES	YES	NO	YES	YES	YES	YES	YES	YES	NO	NO	NO	NO	NO	111	72		96	25-34	19.9184
1056	DAT	Male	NO	Kimbundu	Secondary education II cycle	NO	No	NO	YES	NO	YES	NO	YES	YES	YES	YES	NO	NO	NO	NO	NO	122	64		80	15-24
1057	DAT	Male	NO	kimbundu	Primary education	NO	No	NO	YES	YES	YES	YES	NO	YES	YES	NO	YES	YES	NO	YES	NO	155	107		79	45-54	20.9321
1058	DAT	Male	NO	kimbundu	Primary education	NO	Yes, sometimes	NO	NO	NO	YES	YES	YES	YES	YES	YES	YES	YES	YES	NO	NO	61	59		100	45-54	26.5643
1059	DAT	Male	NO	Umbundo	Scondary education I cycle	YES	Yes, sometimes	NO	YES	NO	YES	YES	YES	YES	YES	YES	NO	YES	NO	NO	NO	97	57		78	35-44	18.3145
1060	DAT	Female	NO	kimbundu	Primary education	NO	No	NO	YES	NO	YES	YES	YES	YES	YES	YES	YES	YES	YES	YES	NO	103	62		82	25-34	20.4444
1061	DAT	Female	NO	kimbundu	Primary education	NO	No	NO	YES	YES	YES	YES	NO	NO	YES	NO	YES	YES	NO	YES	NO	103	88		99	25-34	15.625
1062	DAT	Female	NO	Umbundo		NO	No	YES	NO	NO	NO	NO	NO	NO	NO	NO	NO	NO	NO	NO	NO	108	72			35-44	31.6337
1063	DAT	Female	NO	kimbundu	Primary education	YES	Yes, sometimes	NO	YES	NO	YES	NO	NO	YES	YES	YES	YES	YES	YES	YES	NO	175	46	264		25-34
1064	DAT	Male	NO	kimbundu	Scondary education I cycle	NO	No	YES	YES	NO	YES	YES	NO	YES	YES	YES	YES	NO	NO	YES	NO	126	52		82	25-34	16.8962
1065	DAT	Female	NO	kimbundu	Scondary education I cycle	NO	No	YES	YES	NO	YES	YES	NO	YES	YES	YES	NO	NO	NO	NO	NO	110	73		89	15-24	15.9169
1066	DAT	Female	NO	kimbundu	Scondary education I cycle	NO	Yes, sometimes	NO	YES	YES	yES	YES	YES	YES	YES	YES	YES	YES	YES	YES	NO	130	100		105	25-34
1067	DAT	Female	NO	kimbundu	Primary education	NO	NO	YES	YES	NO	yES	YES	NO	YES	YES	YES	YES	YES	YES	YES	NO	111	72		124	55+	24.2215
1068	DAT	Male	NO	Bacongo	Scondary education I cycle	NO	NO	NO	YES	NO	NO	NO	NO	NO	NO	NO	NO	NO	NO	NO	NO	91	62		109	55+	18.5078
1069	DAT	Female	NO	Bacongo	Scondary education I cycle	NO	NO	NO	YES	NO	NO	NO	NO	NO	NO	NO	NO	NO	NO	NO	NO				98	15-24	19.5556
1070	DAT	Male	NO	kimbundu		NO	NO	NO	YES	NO	yES	NO	NO	NO	NO	NO	NO	NO	NO	NO	NO	99	64	101		15-24	20.984
1071	DAT	Male	NO	Bacongo		NO	NO	NO	YES	NO	yES	NO	NO	NO	NO	NO	NO	NO	NO	NO	NO	107	58		71	25-34	18.6453
1072	HDP	Female	NO	kimbundu	Scondary education I cycle	NO	NO	NO	YES	NO	yES	YES	NO	YES	YES	NO	NO	YES	YES	YES	NO	101	61		102	15-24	17.6308
1073	HDP	Female	NO	Bacongo	Scondary education I cycle	YES	NO	NO	YES	NO	yES	YES	NO	YES	YES	NO	NO	NO	YES	YES	NO	112	78		83	35-44	24.7676
1074	HDP	Male	NO	kimbundu	Scondary education I cycle	NO	NO	NO	YES	NO	YES	YES	NO	YES	NO	NO	NO	NO	NO	YES	NO	99	66		85	15-24	17.6813
1075	HDP	Male	NO	Bacongo	Secondary education II cycle	YES	Yes, sometimes	NO	YES	NO	YES	YES	NO	YES	YES	NO	NO	NO	NO	YES	NO	92	49		87	35-44	15.5896
1076	HDP	Male	NO	Bacongo	Secondary education II cycle	NO	No	NO	YES	NO	YES	YES	NO	YES	YES	NO	NO	YES	NO	YES	NO	101	71		73	15-24	17.6471
1077	HDP	Female	NO	Bacongo	Secondary education II cycle	NO	No	NO	YES	NO	YES	YES	NO	YES	YES	NO	NO	NO	NO	YES	NO	107	78		93	15-24	17.5781
1078	HDP	Male	NO	Kimbundu	Secondary education II cycle	NO	No	NO	YES	NO	YES	YES	NO	YES	YES	NO	NO	YES	NO	YES	NO	102	66	78		15-24	18.4672
1079	HDP	Male	NO	Kimbundu	Secondary education II cycle	NO	No	NO	YES	NO	NO	NO	NO	YES	NO	NO	NO	NO	NO	NO	NO	108	64	117		15-24	16.563
1080	HDP	Female	NO	Kimbundu	Secondary education II cycle	NO	No	NO	YES	NO	NO	NO	NO	YES	YES	NO	NO	NO	NO	YES	YES	113	64	87		25-34	17.5146
1081	HDP	Female	NO	Bacongo	Secondary education II cycle	NO	No	NO	YES	NO	YES	YES	NO	YES	NO	YES	NO	YES	NO	YES	NO	131	86		113	35-44	26.8923
1082	HDP	Male	NO	Kimbundu	Scondary education I cycle	YES	Yes, sometimes	YES	YES	NO	YES	YES	NO	YES	YES	YES	NO	NO	NO	YES	YES	85	47		94	35-44	14.5349
1083	DAT	Female	NO	Kimbundu	Primary education	NO	No	YES	YES	YES	YES	YES	YES	YES	YES	YES	YES	YES	YES	YES	NO	159	92		117	35-44	30.5241
1084	DAT	Male	NO	Kimbundu	Scondary education I cycle	NO	No	NO	YES	YES	YES	YES	YES	YES	YES	YES	YES	YES	YES	YES	NO	110	65		105	35-44	19.8352
1085	DAT	Female	NO	Bacongo	Primary education	NO	No	YES	YES	YES	NO	YES	YES	NO	YES	NO	YES	YES	YES	YES	NO	152	86		91	45-54	21.6128
1086	DAT	Female	NO	Kimbundu	Secondary education II cycle	NO	Yes, sometimes	YES	YES	YES	YES	YES	YES		YES	YES	YES	YES	YES	YES	NO	173	113		132	35-44	36.3573
1087	DAT	Male	NO	Kimbundu	Primary education	NO	No	YES	YES	YES	YES	YES	YES	YES	YES	YES	YES	YES	YES	YES	NO	176	109		90	55+	23.3377
1088	DAT	Female	NO	Kimbundu	Illiterate	NO	No	NO	YES	YES	YES	YES	YES	YES	YES	YES	YES	YES	YES	YES	YES	192	148		96	55+	26.4236
1089	DAT	Female	NO	Kimbundu	University	NO	NO	YES	YES	YES	YES	YES	YES	YES	YES	YES	YES	YES	YES	YES	NO	128	78		106	35-44	39.3503
1090	DAT	Female	NO	Bacongo	Primary education	NO	NO	YES	YES	YES	YES	YES	YES	YES	YES	YES	YES	YES	YES	YES	NO	126	76		99	45-54	30.116
1091	DAT	Male	NO	Kimbundu	University	NO	NO	NO	YES	NO	YES	YES	YES	YES	NO	YES	NO	NO	NO	YES	NO	81	64		90	25-34	20.8209
1092	DAT	Male	YES	Other	Secondary education II cycle	NO	NO	NO	YES	NO	YES	YES	YES	YES	YES	YES	YES	YES	YES	YES	NO	158	90		135	35-44	25.2595
1093	DAT	Female	NO	Kimbundu	Secondary education II cycle	NO	NO	NO	YES	NO	YES	YES	NO	YES	YES	YES	YES	YES	YES	YES	YES	140	97		105	35-44
1094	DAT	Female	YES	Kimbundu	Secondary education II cycle	NO	Yes, sometimes	NO	NO	NO	YES	YES	YES	YES	YES	YES	YES	YES	YES	YES	NO	133	94		133	35-44	35.5556
1095	DAT	Male	NO	Umbundo	Secondary education II cycle	NO	NO	NO	YES	NO	YES	NO	NO	YES	NO	NO	NO	NO	NO	YES	NO	147	84		93	15-24	21.4691
1096	DAT	Female	NO	Kimbundu	Primary education	NO	Yes, sometimes	NO	YES	YES	YES	YES	YES	YES	YES	YES	NO	NO	NO	YES	NO	154	87		100	45-54	26.2227
1097	DAT	Female	NO	Kimbundu	Primary education	NO	NO	YES	NO	NO	YES	NO	NO	YES	NO	NO	NO	NO	NO	YES	NO	194	132		339	45-54	25.721
1098	DAT	Male	NO	Umbundo	Scondary education I cycle	NO	Yes, sometimes	NO	YES	YES	YES	YES	YES	YES	YES	YES	YES	YES	YES	YES	NO	130	90		122	15-24	20.4444
1099	DAT	Female	NO	Kimbundu	Secondary education II cycle	YES	Yes, sometimes	NO	YES	NO	YES	YES	YES	YES	YES	YES	YES	YES	YES	NO	NO	140	98		108	55+	23.0469
1100	DAT	Male	NO	Kimbundu	Scondary education I cycle	YES	Yes, sometimes	NO	YES	NO	YES	YES	YES	YES	YES	YES	YES	YES	YES	YES	NO	140	100		110	45-54	29.2969
1101	DAT	Male	NO	Kimbundu	Secondary education II cycle	NO	No	NO	YES	NO	YES	NO	NO	YES	YES	YES	NO	YES	YES	YES	NO	164	109		74	45-54	18.726
1102	DAT	Female	NO	Kimbundu	Secondary education II cycle	NO	No	NO	YES	NO	YES	YES	YES	YES	YES	YES	YES	YES	YES	YES	NO	119	89		84	15-24	19.9219
1103	DAT	Female	NO	Kimbundu	Scondary education I cycle	NO	No	NO	YES	NO	YES	YES	YES	YES	YES	YES	YES	YES	YES	YES	NO	124	70		87	15-24	21.5045
1104	DAT	Male	NO	Kimbundu	Illiterate	NO	No	NO	YES	NO	YES	YES	YES	YES	YES	YES	YES	YES	YES	YES	YES	122	56		77	15-24	18.1662
1105	DAT	Female	NO	Kimbundu	Scondary education I cycle	NO	No	YES	YES	NO	YES	YES	YES	NO	YES	YES	YES	YES	YES	YES	YES	163	92		97	55+	36.1323
1106	DAT	Female	YES	Umbundo	Primary education	YES	Yes, sometimes	YES	YES	NO	YES	YES	YES	YES	YES	YES	YES	YES	YES	YES	NO				57	55+	19.5312
1107	DAT	Female	NO	Umbundo	Primary education	NO	Yes, sometimes	NO	YES	NO	YES	YES	YES	YES	YES	YES	YES	YES	YES	YES	NO	98	59		150	25-34	17.0874
1108	DAT	Male	NO	Umbundo	Scondary education I cycle	NO	No	NO	YES	NO	YES	YES	YES	YES	YES	YES	YES	YES	NO	NO	NO	90	53		86	25-34	20.0778
1109	DAT	Male	NO	kimbundu	Scondary education I cycle	NO	No	NO	YES	NO	YES	NO	NO	NO	NO	NO	NO	NO	NO	NO	NO	110	80		93	25-34	17.6308
1110	DAT	Male	NO	Umbundo	Secondary education II cycle	NO	No	NO	YES	NO	YES	YES	YES	YES	YES	YES	YES	YES	YES	YES	NO	105	60		82	25-34	20.5191
1111	DAT	Female	NO	Umbundo	Primary education	NO	No	YES	YES	NO	YES	YES	YES	YES	YES	YES	YES	YES	NO	YES	NO	110	80		93	35-44	17.4747
1112	DAT	Male	NO	kimbundu	Scondary education I cycle	NO	Yes, sometimes	YES	YES	NO	YES	NO	NO	NO	NO	NO	NO	NO	NO	NO	NO	117	70		67	25-34	24.5043
1113	DAT	Male	NO	kimbundu		NO	No	NO	YES	NO	YES	NO	NO	NO	NO	NO	NO	NO	NO	NO	NO	146	88		84	55+	26.6749
1114	DAT	Male	NO	kimbundu	Primary education	NO	No	YES	NO	NO	NO	NO	NO	NO	NO	NO	NO	NO	NO	YES	NO	129	78		81	45-54	23.4509
1115	DAT	Female	NO	kimbundu	Scondary education I cycle	NO	No	NO	NO	NO	NO	NO	NO	NO	NO	NO	NO	NO	NO	NO	NO	118	69		110	25-34	32.8889
1116	DAT	Male	NO	kimbundu	Scondary education I cycle	NO	NO	NO	YES	NO	yES	YES	NO	YES	YES	YES	YES	YES	YES	NO	NO	120	90		108	25-34	16.4062
1117	DAT	Male	NO	kimbundu	Scondary education I cycle			NO	YES	NO	yES	NO	NO	NO	NO	NO	NO	NO	NO	NO	NO					25-34	16.609
1118	DAT	Male	NO	kimbundu		NO	NO	NO	YES	NO	yES	NO	NO	NO	NO	NO	NO	NO	NO	NO	NO	106	63		122	25-34	15.7313
1119	DAT	Male	NO	kimbundu	Primary education	NO	NO	NO	YES	NO	yES	YES	YES	YES	YES	YES	YES	YES	YES	YES	NO	84	53		93	45-54
1120	DAT	Male	NO	kimbundu	Scondary education I cycle	NO	NO	NO	YES	NO	yES	NO	NO	NO	NO	NO	NO	NO	NO	NO	NO	94	68	87		35-44	19.1467
1121	DAT	Female	NO	kimbundu	Scondary education I cycle	NO	Yes, sometimes	NO	YES	NO	yES	NO	NO	NO	NO	NO	NO	NO	NO	NO	YES	152	102	147		45-54	32.0312
1122	DAT	Female	NO	kimbundu		NO	NO	NO	YES	NO	yES	NO	NO	NO	NO	NO	NO	NO	NO	NO	YES	193	127			45-54	29.7143
1123	DAT	Female	NO	kimbundu	Scondary education I cycle	NO	NO	YES	YES	NO	yES	NO	NO	NO	NO	NO	NO	NO	NO	NO		135	95			25-34	18.8189
1124	DAT	Female	NO	kimbundu	Scondary education I cycle	NO	NO	NO	NO	NO	NO	NO	NO	NO	NO	NO	NO	NO	NO	NO	YES	152	87		94	45-54	33.9493
1125	DAT	Female	NO	Bacongo	Scondary education I cycle	NO	No	NO	YES	NO	YES	NO	NO	NO	NO	NO	NO	NO	NO	NO		129	71			25-34	24.8889
1126	Cariango	Male	NO	Kimbundu	Primary education	YES	Yes, everyday	NO	YES	NO	YES	YES	YES	YES	YES	YES	NO	NO	YES	YES	NO	104	74		85	35-44
1127	Cariango	Male	NO	Kimbundu	Scondary education I cycle	NO	No	NO	YES	NO	YES	YES	YES	YES	YES	YES	NO	YES	YES	YES	NO	103	79		82	25-34
1128	Cariango	Male	NO	Kimbundu	Scondary education I cycle	NO	No	YES	YES	NO	YES	YES	YES	NO	YES	NO	YES	YES	YES	YES	YES	150	109		97	45-54	15.8261
1129	Cariango	Male	NO	Umbundo	Secondary education II cycle	NO	No	NO	YES	NO	YES	NO	NO	YES	YES	NO	NO	NO	NO	NO	NO	106	71		112	15-24	12.5512
1130	Cariango	Female	NO	Bacongo	Scondary education I cycle	NO	No	NO	YES	NO	NO	NO	YES	YES	YES	YES	NO	YES	YES	NO	NO	93	60		85	35-44	16.7062
1131	Cariango	Female	NO	Kimbundu	Secondary education II cycle	NO	No	NO	YES	NO	YES	YES	NO	YES	YES	YES	YES	YES	YES	YES	NO	111	70		80	15-24	16.7657
1132	Cariango	Female	NO	Kimbundu	Primary education	NO	Yes, sometimes	NO	YES	NO	YES	NO	NO	YES	NO	NO	YES	NO	YES	NO	YES	151	111		91	45-54	14.758
1133	Cariango	Male	NO	Kimbundu	Primary education	YES	Yes, sometimes	NO	YES	NO	YES	YES	YES	YES	NO	NO	YES	YES	YES	YES	NO	110	80		143	35-44	17.9151
1134	Cariango	Female	NO	Kimbundu	Primary education	NO	No	NO	YES	NO	NO	NO	YES	NO	YES	YES	YES	NO	YES	YES	NO	145	92		92	45-54	24.6094
1136	Cariango	Male	NO	Kimbundu		NO	Yes, sometimes	NO	YES	NO	YES	NO	NO	YES	NO	NO	NO	NO	NO	NO	NO	103	75		96	35-44	17.8359
1137	Cariango	Female	NO	Kimbundu	Primary education	NO	Yes, sometimes	NO	NO	NO	YES	YES	NO	YES	YES	YES	NO	NO	YES	YES	NO	115	77		71	25-34	17.0392
1138	Cariango	Male	NO	Kimbundu	Secondary education II cycle	NO	No	YES	YES	NO	NO	NO	NO	YES	NO	YES	NO	NO	NO	NO	YES	144	103		72	25-34	20.5897
1139	Cariango	Male	NO	Bacongo	Scondary education I cycle	NO	NO	NO	YES	NO	NO	YES	YES	NO	NO	YES	NO	YES	NO	YES	NO	114	73		81	15-24	16.5289
1140	Cariango	Male	YES	Kimbundu	Primary education	NO	NO	NO	YES	NO	YES	YES	YES	NO	NO	YES	NO	NO	YES	YES	NO	153	84		122	45-54	17.7154
1141	Cariango	Female	NO	Kimbundu	Primary education	NO	NO	NO	NO	NO	YES	YES	NO	NO	NO	NO	YES	YES	YES	YES	YES	150	87		173	55+
1142	Cariango	Female	NO	Kimbundu	Primary education	NO	NO	YES	YES	NO	NO	YES	NO	YES	YES	YES	NO	YES	YES	NO	NO	85	62		90	35-44	23.1247
1143	Cariango	Male	NO	Kimbundu	Primary education	NO	Yes, sometimes	NO	YES	NO	NO	NO	YES	YES	YES	YES	NO	YES	YES	YES	NO	108	70		90	25-34	19.1512
1144	Cariango	Male	NO	Kimbundu	Primary education	YES	Yes, everyday	NO	YES	NO	YES	YES	YES	YES	YES	YES	NO	NO	YES	YES	NO	93	60		69	35-44
1145	Cariango	Male	NO	Kimbundu	Secondary education II cycle	NO	NO	NO	YES	YES	NO	YES	NO	YES	YES	NO	YES	NO	YES	NO	NO	123	79		116	35-44	16.7657
1146	Cariango	Female	NO	Kimbundu	Primary education	NO	NO	YES	YES	YES	YES	YES	NO	YES	YES	YES	NO	NO	NO	YES	NO	125	72		107	45-54	20.7031
1147	Cariango	Female	NO	Kimbundu	Secondary education II cycle	NO	NO	NO	YES	NO	YES	YES	YES	YES	YES	YES	YES	NO	YES	YES	NO	111	72		132	15-24	18.4202
1148	Cariango	Male	NO	Kimbundu	Primary education	NO	No	YES	NO	YES	NO	YES	NO	YES	YES	NO	YES	NO	NO	YES	YES	155	97		74	55+	18.7242
1149	Cariango	Male	NO	Kimbundu	Scondary education I cycle	NO	Yes, sometimes	YES	NO	NO	NO	YES	NO	YES	YES	YES	YES	NO	YES	YES	NO	112	71		102	55+	18.2563
1150	Cariango	Female	NO	Kimbundu	Primary education	NO	No	NO	NO	NO	NO	YES	YES	NO	NO	YES	NO	YES	NO	YES	NO	113	64		67	15-24	20.6131
1151	Cariango	Male	NO	Kimbundu	Secondary education II cycle	NO	No	NO	NO	YES	NO	YES	YES	YES	YES	YES	YES	YES	YES	YES	NO	105	68		54	35-44	16.4644
1152	Cariango	Female	NO	Kimbundu	Illiterate	NO	No	NO	YES	NO	YES	YES	YES	YES	NO	YES	YES	YES	NO	YES	NO	147	93		95	35-44	19.7239
1153	Cariango	Female	NO	Bacongo	Primary education	NO		NO	YES	NO	YES	NO	NO	YES	YES	YES	YES	YES	YES	NO	NO	72	51		98	25-34	16.0145
1154	Cariango	Male	NO	Kimbundu	Secondary education II cycle	NO	Yes, sometimes	YES	YES	NO	YES	NO	YES	NO	YES	YES	YES	NO	NO	NO	NO	155	98		110	55+	26.6749
1155	Cariango	Female	YES	Kimbundu	Primary education	NO	No	NO	YES	YES	YES	NO	NO	YES	YES	YES	YES	YES	YES	YES	NO	113	68		75	25-34	25.1039
1156	Cariango	Male	YES	kimbundu	Scondary education I cycle	NO	No	NO	YES	NO	YES	NO	NO	YES	YES	YES	NO	NO	NO	YES					72	15-24	21.6721
1157	Cariango	Male	NO	kimbundu	Secondary education II cycle	NO	No	NO	YES	NO	YES	NO	YES	NO	YES	NO	NO	NO	NO	YES	NO	116	64		88	15-24	17.1753
1158	Cariango	Male	NO		Scondary education I cycle	NO	Yes, sometimes	NO	YES	NO	YES	YES	NO	YES	YES	NO	YES	YES	YES	YES	NO	111	88		95	15-24	17.7897
1159	Cariango	Female	NO	kimbundu	Primary education	NO	Yes, sometimes	NO	YES	NO	YES	NO	YES	YES	NO	YES	NO	NO	NO	YES	NO	105	85		123	35-44	16.2331
1160	Cariango	Female	NO	kimbundu	Secondary education II cycle	NO	Yes, sometimes	NO	YES	NO	NO	YES	YES	YES	YES	YES	YES	YES	YES	NO	NO	106	75		90	35-44	26.5625
1161	Cariango	Male	NO	kimbundu	Scondary education I cycle	NO	No	NO	YES	NO	YES	NO	NO	YES	YES	YES	YES	NO	YES	YES	NO	177	73			15-24	17.5926
1162	Cariango	Female	NO	kimbundu	Primary education	NO	No	NO	NO	NO	YES	NO	NO	YES	NO	NO	NO	NO	NO	NO	NO	130	80		88	45-54	17.0088
1163	Cariango	Female	NO	kimbundu	Primary education	NO		NO	YES	NO	YES	YES	NO	YES	YES	YES	YES	YES	YES	YES	NO	84	52		78	15-24	18.2961
1164	Cariango	Female	NO	kimbundu		NO	No	NO	YES	NO	yES	YES	YES	YES	YES	YES	NO	YES	NO	YES	NO	109	76		88	25-34	17.0874
1165	Cariango	Female	NO	kimbundu	Secondary education II cycle	NO	No	NO	YES	NO	yES	NO	NO	YES	YES	YES	NO	NO	NO	YES	NO	107	76		73	25-34	20.8209
1166	Cariango	Female	NO	kimbundu	University	NO	NO	NO	NO	YES	yES	YES	YES	NO	YES	YES	YES	NO	NO	YES	NO	93	50		79	25-34	22.9854
1167	Cariango	Female	NO	kimbundu	Secondary education II cycle	NO	NO	NO	YES	YES	yES	NO	YES	YES	YES	YES	NO	NO	NO	YES	NO	79	62		85	25-34	19.9792
1168	Cariango	Male	YES	kimbundu	Secondary education II cycle	NO	NO	NO	YES	NO	NO	YES	NO	YES	YES	NO	NO	NO	NO	YES	NO	93	63		81	15-24	20.5499
1169	Cariango	Female	NO	kimbundu	Primary education	NO	NO	NO	NO	NO	yES	YES	YES	YES	YES	YES	YES	YES	YES	YES	NO	148	96		105	15-24	24.1672
1170	Cariango	Female	NO	kimbundu	Secondary education II cycle	NO	NO	NO	NO	NO	NO	YES	YES	YES	NO	YES	NO	NO	YES	NO	NO	103	64		88	25-34	17.5696
1171	Cariango	Female	NO	kimbundu	Illiterate	NO	NO	NO	NO	NO	NO	NO	YES	NO	NO	YES	NO	YES	NO	NO	YES	170	100		91	55+	38.2866
1172	Cariango	Male	NO	kimbundu	Scondary education I cycle	NO	NO	NO	YES	NO	yES	YES	YES	YES	YES	YES	NO	NO	YES	NO	NO	109	80		89	35-44	17.9931
1173	Cariango	Male	NO	Umbundo	Primary education	NO	NO	YES	YES	NO	yES	YES	YES	YES	YES	NO	YES	YES	YES	NO	YES	122	95		74	35-44	14.533
1174	Cariango	Female	NO	kimbundu	Illiterate	NO	NO	NO	YES	NO	NO	YES	YES	YES	YES	YES	NO	NO	NO	YES	YES	204	128		86	55+	22.2137
1175	Cariango	Female	NO	Kimbundu	Illiterate	NO	No	NO	YES	YES	YES	YES	YES	YES	YES	YES	YES	NO	NO	YES	YES	138	93		75	45-54	20.5761
1176	Cariango	Female	NO	Kimbundu	Scondary education I cycle	NO	Yes, sometimes	NO	YES	NO	YES	NO	YES	YES	YES	YES	YES	YES	YES	YES	NO	96	69		92	25-34	18.1252
1177	Cariango	Female	NO	Bacongo	University	NO	No	NO	NO	NO	NO	YES	YES	NO	NO	YES	NO	NO	NO	YES	NO	91	68		75	25-34	22.231
1178	Cariango	Male	NO	Other	University	NO	No	YES	YES	NO	YES	NO	NO	NO	YES	NO	YES	NO	YES	NO	NO	112	66		55	25-34	15.0204
1179	Cariango	Male	NO	Kimbundu	Scondary education I cycle	NO	No	NO	YES	NO	YES	YES	NO	YES	NO	YES	NO	NO	NO	NO	NO	106	68		88	35-44	19.9219
1180	Cariango	Female	NO	Bacongo	Illiterate	NO	No	NO	YES	NO	YES	NO	YES	NO	NO	YES	YES	NO	YES	YES	YES	156	95		199	55+	27.1918
1181	Cariango	Male	NO	Kimbundu	Secondary education II cycle	NO	Yes, sometimes		NO	YES	NO	NO	NO	YES	YES	NO	YES	YES	NO	YES	NO	106	73		89	25-34	20.148
1182	Cariango	Male	NO	Kimbundu	Scondary education I cycle	NO	Yes, sometimes	NO	YES	NO	YES	NO	NO	NO	YES	NO	NO	NO	NO	NO	YES	153	92		82	55+	18.4672
1183	Cariango	Male	NO	Bacongo	University	NO	No	NO	YES	NO	YES	YES	YES	NO	NO	YES	NO	NO	NO	YES	NO	122	76		89	15-24	17.8748
1184	Cariango	Male	NO	Kimbundu	Scondary education I cycle	NO	Yes, sometimes	NO	YES	NO	YES	YES	NO	NO	NO	YES	NO	NO	NO	NO	NO	103	62		76	15-24	17.0403
1185	Cariango	Male	NO	Bacongo	Scondary education I cycle	NO	Yes, sometimes	NO	YES	NO	YES	YES	YES	YES	YES	YES	YES	YES	YES	YES	NO	115	77		90	25-34	17.3611
1186	Cariango	Male	NO	Kimbundu		NO	No	NO	YES	NO	NO	NO	YES	NO	NO	YES	YES	NO	YES	NO	NO	102	82		100	15-24	16.3304
1187	Cariango	Male	NO	Kimbundu	Secondary education II cycle	NO	No	NO	YES	NO	NO	NO	NO	NO	NO	NO	YES	YES	YES	NO	NO	108	66		89	35-44	23.9188
1188	Cariango	Male	NO	Kimbundu	Secondary education II cycle	NO	No	NO	YES	NO	NO	NO	YES	NO	NO	NO	NO	NO	YES	NO	NO	122	70		97	15-24	19.0451
1189	Cariango	Female	NO	Bacongo	Scondary education I cycle	NO	NO	NO	YES	NO	NO	NO	YES	YES	YES	YES	YES	NO	NO	YES	NO	100	70		96	35-44	22.4323
1190	Cariango	Female	NO	Kimbundu		NO	NO	NO	YES	NO	NO	NO	NO	NO	YES	YES	YES	YES	YES	YES	NO	100	60		75	15-24	18.0938
1191	Cariango	Male	NO	Kimbundu	Primary education	NO	NO	YES	YES	NO	YES	YES	YES	YES	NO	YES	YES	YES	YES	YES	NO	120	60		107	55+	25.2826
1192	Cariango	Female	NO	Kimbundu	University	NO	NO	NO	YES	NO	NO	NO	NO	NO	NO	NO	NO	NO	NO	NO	NO	87	62		95	25-34	24.653
1193	Cariango	Female	NO	Kimbundu	Secondary education II cycle	NO	NO	NO	YES	NO	YES	NO	YES	NO	YES	YES	NO	NO	NO	YES	NO	120	80		84	15-24	28.6215
1194	Cariango	Female	NO	Kimbundu	Secondary education II cycle	NO	NO	NO	NO	NO	YES	YES	YES	NO	YES	YES	YES	YES	YES	NO	NO	113	60		88	25-34	18.6453
1195	Cariango	Female	NO	Kimbundu	Illiterate	NO	NO	NO	NO	NO	YES	YES	YES	YES	YES	YES	NO	NO	NO	YES	NO	148	94		81	25-34	28.3053
1196	Cariango	Female	NO	Kimbundu	Scondary education I cycle	NO	NO	NO	NO	NO	NO	YES	NO	NO	NO	YES	NO	YES	YES	YES	NO	111	60		77	15-24	17.5278
1197	Cariango	Male	NO	Kimbundu	Scondary education I cycle	YES	Yes, everyday	NO	YES	NO	NO	NO	YES	NO	NO	YES	NO	NO	YES	NO	NO	111	70		83	25-34	24.0238
1198	Cariango	Male	NO	Kimbundu	Scondary education I cycle	YES	No	NO	YES	YES	YES	YES	YES	YES	NO	YES	YES	YES	NO	YES	YES	102	75		93	25-34	18.3768
1199	Cariango	Female	NO	Kimbundu	Secondary education II cycle			NO	NO	NO	YES	YES	YES	YES	YES	YES	NO	NO	NO	NO	NO	132	86		66	25-34	31.2488
1200	Cariango	Female	NO	Kimbundu	Scondary education I cycle	NO	No	NO	YES	YES	YES	YES	YES	YES	YES	YES	YES	NO	NO	NO	NO	99	79		78	15-24	21.2183
1201	Cariango	Male	NO	Bacongo	Primary education	NO	Yes, sometimes	NO	NO	NO	YES	YES	YES	YES	YES	YES	YES	YES	YES	NO	NO	100	60		85	35-44	17.1875
1202	HDP	Male	NO	Bacongo	University	NO	No	NO	NO	NO	NO	NO	NO	NO	NO	YES	NO	NO	NO	YES	NO	99	64		85	15-24	19.0039
1203	HDP	Female	NO	Kimbundu	Scondary education I cycle	NO	No	NO	YES	NO	YES	YES	NO	YES	YES	NO	NO	YES	NO	YES	NO	115	73		83	15-24	16.6933
1204	HDP	Female	NO	Kimbundu	Secondary education II cycle	NO	No	NO	YES	NO	NO	NO	NO	YES	YES	NO	NO	NO	NO	NO	YES	108	70		97	15-24	15.0551
1205	HDP	Male	NO	Kimbundu	Scondary education I cycle	NO	Yes, sometimes	NO	YES	NO	YES	YES	NO	YES	YES	NO	NO	YES	YES	YES	NO	92	67	78		15-24	18.5568
1206	HDP	Male	NO	kimbundu	Secondary education II cycle	NO	Yes, sometimes	NO	YES	NO	YES	NO	NO	YES	YES	NO	NO	YES	YES	YES	NO	101	56		95	35-44	16.7872
1207	HDP	Female	NO	Bacongo	Secondary education II cycle	NO	No	NO	YES	NO	YES	YES	NO	YES	YES	NO	NO	YES	YES	YES	NO	96	61	88		15-24	18.2531
1208	HDP	Male	NO	kimbundu	Scondary education I cycle	NO	Yes, sometimes	NO	YES	NO	YES	YES	NO	YES	YES	NO	NO	YES	YES	YES	NO	94	54	102		25-34	16.263
1209	HDP	Male	NO	Bacongo	Scondary education I cycle	NO	No	NO	YES	NO	YES	NO	NO	YES	NO	YES	NO	NO	NO	YES	NO	107	69		87	25-34	19.2672
1210	HDP	Male	NO	kimbundu	Scondary education I cycle	NO	Yes, sometimes	NO	YES	NO	YES	NO	NO	YES	YES	NO	NO	YES	NO	YES	NO	89	64		96	55+	19.0451
1211	HDP	Female	NO	Other	Scondary education I cycle	NO	No	NO	YES	NO	YES	YES	NO	YES	YES	NO	NO	NO	NO	YES	NO	93	63	130		15-24	15.2109
1212	HDP	Female	NO	kimbundu	Illiterate	NO	No	NO	YES	NO	YES	YES	NO	YES	YES	NO	NO	YES	YES	YES	NO	107	50		123	35-44	17.6693
1213	HDP	Female	NO	kimbundu	Primary education	NO	No	NO	YES	NO	YES	YES	NO	YES	YES	NO	NO	YES	YES	YES	NO	110	67	136		15-24	14.2832
1214	HDP	Male	YES	kimbundu	Secondary education II cycle	NO	No	NO	YES	NO	yES	YES	YES	YES	YES	NO	YES	NO	YES	YES	NO	86	57			25-34	15.5238
1215	HDP	Female	NO	Bacongo	Scondary education I cycle	NO	No	NO	YES	NO	yES	YES	NO	YES	NO	NO	NO	YES	YES	YES	NO	90	56	202		35-44	22.4766
1216	HDP	Male	NO	kimbundu	Scondary education I cycle	NO	NO	NO	YES	NO	yES	NO	NO	YES	YES	NO	NO	NO	NO	YES	NO	104	76	122		35-44	19.9481
1217	HDP	Female	NO	kimbundu	Secondary education II cycle	NO	NO	NO	YES	NO	NO	NO	NO	YES	YES	YES	YES	YES	YES	YES	NO	97	67	85		15-24	18.0802
1218	HDP	Male	NO	kimbundu	Scondary education I cycle	NO	NO	NO	YES	NO	NO	YES	NO	YES	NO	YES	NO	NO	NO	NO	NO	101	49		79	15-24	15.427
1219	DAT	Male	YES	kimbundu	University	NO	NO	NO	YES	NO	yES	YES	YES	YES	NO	YES	NO	NO	NO	NO	NO	115	68		87	45-54	31.2394
1220	DAT	Male	NO	kimbundu	Primary education	NO	NO	YES	YES	YES	yES	YES	YES	YES	YES	YES	YES	YES	YES	YES	NO	144	84		376	55+	20.3244
1221	DAT	Female	NO	kimbundu	University	NO	Yes, sometimes	NO	YES	NO	NO	NO	NO	NO	YES	NO	NO	NO	NO	YES	NO	148	99		97	35-44	23.1084
1222	DAT	Female	NO	kimbundu	Scondary education I cycle	NO	NO	YES	YES	NO	yES	NO	YES	NO	NO	NO	NO	NO	NO	YES	NO	103	59		91	15-24	17.0993
1223	DAT	Female	NO	kimbundu	Secondary education II cycle	NO	NO	YES	NO	NO	yES	NO	NO	YES	NO	NO	NO	NO	NO	YES	NO	100	75		85	35-44	20.5049
1224	DAT	Female	NO	kimbundu	Scondary education I cycle	NO	NO	YES	NO	NO	YES	NO	NO	YES	NO	YES	NO	NO	NO	YES	NO	103	59	104		25-34	27.4077
1225	DAT	Female	NO	Kimbundu	Scondary education I cycle	NO	No	NO	YES	YES	YES	YES	YES	YES	YES	YES	YES	YES	YES	YES	NO	125	89		137	35-44	31.2213
1226	DAT	Male	NO	Umbundo	Secondary education II cycle	NO	No	YES	YES	YES	YES	YES	YES	YES	NO	YES	YES	YES	YES	YES	NO	148	129		87	25-34	39.3011
1227	DAT	Female	NO	Kimbundu	Illiterate	NO	No	YES	YES	YES	YES	YES	YES	YES	NO	YES	YES	YES	YES	YES	YES	152	98		91	55+	27.8293
1228	DAT	Female	NO	Bacongo	Scondary education I cycle	NO	No	NO	YES	YES	YES	YES	YES	YES	YES	YES	YES	YES	YES	YES	NO	149	85		97	45-54	29.7619
1229	DAT	Female	NO	Kimbundu	Scondary education I cycle	NO	Yes, sometimes	NO	YES	NO	YES	NO	NO	YES	NO	NO	NO	NO	NO	YES	NO	141	90		109	35-44	32.7449
1230	DAT	Female	NO	Other	Primary education	NO	No	NO	YES	YES	YES	YES	NO	YES	YES	NO	YES	YES	YES	YES	NO	160	90		125	35-44	41.4062
1231	DAT	Female	NO	Kimbundu	Primary education	NO	No	NO	YES	NO	YES	YES	YES	YES	YES	YES	YES	NO	YES	YES	NO	202	107		87	55+	30.3233
1232	DAT	Male	NO	Umbundo	Secondary education II cycle	NO	Yes, sometimes	NO	NO	NO	YES	NO	NO	YES	NO	YES	NO	NO	NO	NO	NO	125	74		99	25-34	27.9904
1233	DAT	Male	NO		Scondary education I cycle	NO	Yes, everyday	YES	YES	NO	NO	NO	NO	YES	NO	NO	NO	NO	NO	YES	NO	124	102		93	25-34	25.5937
1234	DAT	Male	NO	Umbundo	Scondary education I cycle	NO	Yes, sometimes	NO																		25-34
1235	DAT	Female	NO	Kimbundu	Scondary education I cycle	NO	No	NO	YES	NO	YES	YES	YES	YES	YES	YES	YES	YES	YES	NO	NO	109	66		95	15-24	26.9531
1236	DAT	Female	NO	Umbundo	Secondary education II cycle	NO	No	NO	YES	NO	YES	YES	NO	YES	YES	YES	YES	YES	YES	YES	YES	234	120		109	55+	26.2976
1237	DAT	Female	NO	Kimbundu	Primary education	NO	No	YES	YES	NO	YES	YES	YES	YES	YES	YES	YES	YES	YES	YES	NO	131	85		83	45-54
1238	DAT	Female	NO	Bacongo				NO	YES	NO	YES	NO	NO	NO	NO	NO	NO	NO	NO	NO	NO	150	90		100	25-34	16.7062
1239	DAT	Male	NO	Kimbundu		NO		NO	YES	NO	YES	NO	NO	NO	NO	NO	NO	NO	NO	NO		156	108			45-54
1240	DAT	Male	NO	Kimbundu	Scondary education I cycle	NO	Yes, sometimes	NO	YES	YES	YES	YES	NO	YES	YES	YES	NO	NO	NO	NO	NO	83	55		99	25-34	18.3655
1241	DAT	Male	NO		Secondary education II cycle	NO	Yes, sometimes	NO	YES	NO	YES	NO	NO	YES	NO	NO	NO	NO	NO	YES	NO	101	64	99		25-34	21.1553
1242	DAT	Female	NO	Umbundo	Scondary education I cycle	NO	Yes, sometimes	NO	YES	NO	YES	YES	YES	YES	NO	YES	NO	NO	NO	YES	NO				90	35-44	15.0597
1243	DAT	Male	NO	Kimbundu	Scondary education I cycle	YES	Yes, sometimes	NO	YES	NO	YES	NO	NO	YES	NO	NO	NO	NO	NO	YES	NO	93	56	153		25-34	16.6525
1244	DAT	Female	NO	Kimbundu	Illiterate	YES	Yes, sometimes	YES	YES	NO	YES	NO	NO	NO	NO	NO	NO	YES	NO	NO	NO	151	100		108	55+
1245	DAT	Female	NO	Kimbundu		NO			YES	NO	YES	NO	NO	NO	NO	NO	NO	NO	NO	NO	NO	134	77		91	55+	16.8962
1246	DAT	Male	NO	Kimbundu	Secondary education II cycle	NO	NO	NO	YES	NO	YES	YES	YES	YES	YES	YES	YES	YES	YES	YES	YES	137	121		115	25-34	17.8359
1247	DAT	Female	NO	Umbundo	Illiterate	NO	No	YES	YES	NO	YES	YES	YES	YES	YES	YES	YES	YES	YES	YES	YES	174	103		96	55+	26.9127
1248	DAT	Male	NO	Kimbundu	Scondary education I cycle	NO	No	YES	NO	NO	NO	NO	NO	YES	NO	NO	NO	NO	NO	NO	NO	135	68		86	25-34	20.3244
1249	Cariango	Female	NO	Kimbundu	Primary education	NO	No	NO	YES	NO	YES	YES	NO	YES	YES	YES	NO	NO	NO	NO	NO	146	90		83	35-44	29.7339
1250	Cariango	Female	NO	Kimbundu		NO	No	NO	YES	YES	NO	NO	NO	YES	YES	YES	NO	NO	NO	NO	NO	117	85		117	15-24	22.4766
1251	Cariango	Female	NO	Umbundo	Secondary education II cycle	NO	No	NO	YES	NO	YES	YES	YES	YES	NO	YES	YES	YES	YES	NO	YES	106	59		76	15-24
1252	Cariango	Female	NO	Kimbundu	Scondary education I cycle	NO	No	NO	YES	NO	YES	YES	YES	YES	YES	YES	YES	YES	YES	NO	YES	125	51		127	15-24	21.0517
1253	Cariango	Male	NO	Kimbundu	Illiterate	NO	Yes, sometimes	YES	YES	NO	YES	YES	NO	YES	YES	NO	NO	YES	YES	YES	NO	116	75		91	25-34	16.4153
1254	Cariango	Male	YES	Umbundo	Secondary education II cycle	NO	No	YES	YES	NO	YES	YES	NO	YES	YES	YES	YES	YES	NO	YES	YES	100	61		109	25-34	20.1092
1255	Cariango	Female	NO	Kimbundu	Primary education	NO	No	NO	YES	NO	YES	YES	YES	YES	YES	YES	YES	YES	YES	NO	NO	109	76		77	25-34	18.1312
1256	Cariango	Female	NO	kimbundu	University	NO	No	NO	YES	NO	NO	YES	NO	YES	YES	YES	NO	NO	NO	YES	NO	114	84		110	25-34	25.3443
1257	Cariango	Female	NO	kimbundu	Secondary education II cycle	NO	No	NO	YES	NO	YES	YES	YES	YES	YES	YES	YES	YES	YES	YES	NO	120	66		74	25-34	21.304
1258	Cariango	Female	NO	kimbundu	Primary education	YES	No	YES	YES	NO	YES	YES	YES	YES	YES	YES	YES	NO	YES	NO	YES	158	118			45-54	27.1809
1259	Cariango	Female	NO	kimbundu	Scondary education I cycle	NO	No	YES	NO	YES	YES	YES	YES	YES	YES	YES	YES	YES	NO	YES	YES	114	78		78	25-34	18.902
1260	Cariango	Male	NO	Umbundo	Primary education	NO	No	NO	YES	NO	NO	YES	NO	YES	YES	NO	YES	NO	NO	YES	NO	113	74		115	25-34	18.8707
1261	Cariango	Male	NO	kimbundu	University	NO	Yes, sometimes	NO	NO	NO	NO	YES	YES	YES	NO	YES	NO	NO	YES	YES	YES	128	88		97	25-34	24.2215
1262	Cariango	Male	NO	Bacongo	Secondary education II cycle	NO	Yes, sometimes	NO	YES	NO	YES	YES	NO	YES	NO	NO	YES	YES	NO	YES	NO	86	69		98	15-24	18.424
1263	Cariango	Female	NO	kimbundu	Scondary education I cycle	NO	No	NO	YES	NO	NO	YES	NO	YES	NO	YES	NO	NO	NO	YES	NO	107	83		99	25-34	20.9573
1264	Cariango	Female	NO	Umbundo	Scondary education I cycle	NO	No	NO	YES	YES	NO	YES	YES	YES	YES	YES	YES	YES	NO	NO		108	70		105	15-24	18.8271
1265	Cariango	Male	NO	kimbundu	Secondary education II cycle	NO	Yes, sometimes	NO	NO	NO	yES	NO	YES	YES	NO	YES	YES	YES	YES	NO	NO	130	74		98	15-24	20.8086
1266	Cariango	Male	NO	kimbundu	Secondary education II cycle	NO	NO	NO	YES	NO	yES	NO	YES	YES	YES	NO	YES	NO	YES	YES	NO	105	75		67	15-24	15.427
1267	Cariango	Male	NO	Umbundo	Secondary education II cycle	NO	NO	NO	YES	NO	NO	YES	YES	YES	YES	YES	NO	YES	YES	NO	NO	111	65		99	15-24	22.1367
1268	Cariango	Male	NO	Other	Secondary education II cycle	NO	Yes, sometimes	NO	YES	NO	yES	NO	YES	YES	YES	YES	YES	YES	YES	NO	NO	118	89		77	15-24	22.2041
1269	Cariango	Female	NO	kimbundu	Illiterate	NO	NO	NO	YES	NO	yES	YES	NO	YES	YES	NO	YES	YES	YES	NO	YES	170	100		96	55+	25.2241
1270	Cariango	Female	NO	kimbundu	Scondary education I cycle	NO	NO	NO	YES	NO	yES	YES	YES	YES	NO	YES	NO	YES	NO	NO	NO	101	70		50	15-24	16.937
1271	Cariango	Male	NO	kimbundu	Secondary education II cycle	YES	Yes, sometimes	YES	YES	YES	yES	YES	YES	YES	YES	YES	YES	NO	NO	YES	NO	100	62		81	25-34	19.0381
1272	Cariango	Female	NO	Bacongo	Scondary education I cycle	NO	NO	YES	YES	NO	yES	YES	YES	YES	YES	YES	YES	YES	YES	YES	NO	68			73	35-44
1273	Cariango	Male	NO	kimbundu	Scondary education I cycle	NO	NO	NO	YES	NO	yES	YES	YES	YES	NO	YES	YES	YES	YES	YES	NO	112	70		73	35-44	20.9573
1274	Cariango	Male	NO	kimbundu	Secondary education II cycle	NO	Yes, sometimes	NO	YES	NO	YES	YES	YES	YES	NO	YES	YES	YES	YES	NO	NO	112	75		76	25-34	15.9439
1275	Cariango	Male	NO	Other	Secondary education II cycle	NO	No	NO	YES	NO	YES	YES	NO	YES	YES	YES	YES	YES	YES	NO	NO	108	73		102	15-24	16.7657
1276	Cariango	Female	NO	Kimbundu	Primary education	NO	No	YES	YES	NO	YES	YES	YES	YES	YES	YES	YES	YES	NO	YES	NO				90	15-24	15.4266
1277	Cariango	Female	NO	Kimbundu	Primary education	NO	No	NO	YES	NO	YES	YES	YES	YES	YES	YES	NO	NO	NO	NO	NO	105	65		86	15-24	22.0603
1278	Cariango	Male	NO	Kimbundu	Scondary education I cycle	YES	Yes, sometimes	YES	YES	NO	YES	YES	YES	YES	YES	YES	YES	NO	YES	YES	YES	126	79		101	55+	20.4467
1279	Cariango	Male	NO	Kimbundu	Secondary education II cycle			YES	YES	NO	YES	YES	YES	YES	YES	NO	NO	NO	NO	YES	NO	96	51		85	25-34	16.7573
1280	Cariango	Female	NO	Kimbundu	Primary education	NO	Yes, sometimes	NO	YES	NO	YES	YES	YES	YES	YES	YES	YES	NO	YES	YES	NO	93	67		74	35-44	17.4818
1281	Cariango	Female	NO	Umbundo	Secondary education II cycle	NO	No	NO	YES	NO	YES	YES	NO	YES	YES	YES	NO	YES	NO	NO	NO	102	55		76	15-24	19.8791
1282	Cariango	Male	NO	Umbundo	Secondary education II cycle	YES	Yes, sometimes	NO	NO	NO	YES	YES	YES	YES	NO	YES	NO	NO	YES	NO	NO	106	70		94	15-24	21.6128
1283	Cariango	Male	NO	Umbundo	Scondary education I cycle	NO	No	NO	YES	NO	NO	NO	NO	YES	YES	YES	YES	NO	YES	YES	NO	95	53		86	15-24	18.711
1284	Cariango	Male	NO	Kimbundu	Illiterate	YES	Yes, sometimes	NO	YES	NO	YES	YES	YES	YES	NO	YES	YES	YES	NO	NO	NO	117	84		75	15-24	19.4094
1285	Cariango	Male	NO	Kimbundu	Secondary education II cycle	NO	No	NO	YES	NO	NO	NO	NO	YES	YES	NO	YES	NO	YES	NO	NO	117	56		71	15-24	19.9594
1286	Cariango	Male	NO	Kimbundu	Primary education	YES	Yes, sometimes	NO	YES	NO	YES	YES	YES	YES	NO	NO	YES	YES	YES	NO	NO	109	69		75	35-44	15.427
1287	Cariango	Female	NO	Bacongo	Primary education	NO	No	NO	YES	NO	YES	YES	YES	YES	YES	YES	YES	NO	YES	NO	NO	94	61		85	25-34	18.7962
1288	Cariango	Female	NO	Kimbundu	Illiterate	NO	NO	NO	YES	NO	YES	YES	YES	YES	NO	YES	NO	NO	NO	NO	YES	165	102		102	55+	23.9224
1289	Cariango	Female	NO	Kimbundu	Scondary education I cycle	NO	NO	NO	YES	NO	YES	NO	NO	YES	NO	NO	NO	NO	YES	NO	NO	107	70		79	15-24	20.9644
1290	Cariango	Female	NO	Bacongo	Primary education	NO	NO	NO	YES	NO	YES	YES	YES	YES	NO	YES	YES	YES	YES	NO	NO	87	66		106	45-54	16.6659
1291	Cariango	Male	NO	Kimbundu	Scondary education I cycle	NO	NO	NO	YES	NO	YES	YES	YES	YES	YES	YES	YES	NO	NO	NO	NO	108	61		104	25-34	19.4932
1292	Cariango	Female	NO	Kimbundu	Illiterate	NO	NO	YES	YES	NO	YES	YES	YES	NO	YES	YES	NO	NO	YES	YES	YES	155	106		95	55+	15.4315
1293	Cariango	Male	NO	Kimbundu	Scondary education I cycle	YES	NO	NO	YES	NO	YES	YES	NO	YES	YES	NO	YES	YES	YES	NO	NO	93	51		85	15-24	18.3145
1294	Cariango	Male	NO	Bacongo	Secondary education II cycle	YES	Yes, sometimes	NO	YES	NO	YES	NO	NO	YES	YES	NO	NO	NO	YES	NO	NO	112	68		88	15-24	19.257
1295	Cariango	Male	NO	Kimbundu	Secondary education II cycle	NO	NO	NO	YES	NO	YES	YES	NO	NO	YES	YES	NO	NO	YES	YES	NO	125	82		87	25-34	24.1633
1296	Cariango	Male	NO	Kimbundu	Scondary education I cycle	NO	Yes, sometimes	YES	YES	NO	YES	YES	YES	YES	YES	YES	YES	YES	YES	YES	NO	130	98		107	45-54	17.7832
1297	Cariango	Male	NO		Scondary education I cycle	NO	No	NO	YES	NO	YES	YES	NO	YES	YES	YES	NO	YES	YES	YES	NO	110	65		98	15-24	21.847
1298	Cariango	Male	NO	Kimbundu	University	NO	No	YES	YES	NO	YES	YES	YES	YES	YES	YES	NO	YES	YES	YES	NO	112	70		83	15-24	16.2292
1299	Cariango	Male	NO	Kimbundu	Illiterate	NO	Yes, sometimes	NO	NO	NO	NO	NO	NO	YES	NO	NO	NO	NO	NO	YES	NO	110	70		76	55+
1300	Cariango	Female	NO	Kimbundu	Primary education	NO	Yes, sometimes	NO	YES	NO	NO	NO	NO	YES	YES	YES	NO	YES	YES	NO	NO	99	72		71	25-34	16.7969
1301	Cariango	Female	NO	Bacongo	Primary education	NO	No	NO	YES	NO	YES	YES	NO	YES	NO	YES	YES	YES	YES	NO	NO	91	63		75	25-34	15.4315
1302	Cariango	Male	NO	Kimbundu	Scondary education I cycle	YES	Yes, sometimes	NO	YES	NO	YES	NO	NO	YES	NO	NO	YES	YES	NO	NO	YES	113	77		89	45-54	18.6851
1303	Cariango	Male	NO	Kimbundu	Primary education	NO	No	NO	YES	NO	NO	YES	YES	YES	NO	YES	YES	NO	NO	YES	NO	92	68		109	25-34	15.2439
1304	Cariango	Male	NO	Kimbundu	Secondary education II cycle	YES	Yes, sometimes	NO	YES	NO	YES	YES	YES	YES	YES	YES	YES	YES	YES	YES	NO	100	65		83	25-34	18.6851
1305	Cariango	Female	NO	Kimbundu	Secondary education II cycle	NO	Yes, sometimes	NO	NO	NO	NO	YES	YES	YES	YES	NO	NO	NO	NO	YES	NO	125	96		76	25-34	22.5466
1306	Cariango	Male	NO	kimbundu	Secondary education II cycle	NO	No	NO	YES	NO	YES	NO	NO	NO	YES	YES	YES	YES	YES	YES	NO	116	86		79	15-24	17.5771
1307	Cariango	Male	NO	kimbundu	Scondary education I cycle	YES	No	NO	YES	YES	YES	YES	NO	YES	NO	YES	YES	NO	NO	NO	NO	103	77		130	15-24	18.4965
1308	Cariango	Female	NO	kimbundu	Secondary education II cycle	NO	Yes, sometimes	NO	YES	NO	YES	YES	YES	YES	YES	NO	YES	YES	YES	YES	NO	96	63		103	15-24	19.3962
1309	Cacuaco	Male	NO	Bacongo	Primary education	NO	Yes, everyday	NO	YES	YES	NO	NO	YES	YES	YES	YES	NO	NO	NO	NO	NO	108	74		131	45-54	20.0155
1310	Cacuaco	Male	NO	Bacongo	Scondary education I cycle	NO	No	NO	NO	NO	NO	NO	NO	NO	NO	NO	NO	NO	NO	NO	NO	131	83		104	25-34	19.9184
1311	Cacuaco	Female	NO	Umbundo	Scondary education I cycle	NO	No	NO	YES	NO	NO	NO	NO	NO	NO	YES	NO	NO	NO	NO	NO	107	76		85	15-24	15.6226
1312	Cacuaco	Male	NO	Umbundo	University	NO	No	NO	YES	NO	NO	YES	YES	NO	YES	YES	NO	NO	NO	NO	NO	108	45		63	25-34	17.3744
1313	Cacuaco	Female	NO	Umbundo	Primary education	YES	Yes, sometimes	NO	YES	YES	yES	YES	YES	YES	NO	YES	NO	NO	NO	NO	NO	111	83		106	35-44	18.8588
1314	Cacuaco	Female	NO	Umbundo	Primary education	NO	Yes, sometimes	NO	YES	NO	yES	YES	YES	YES	NO	YES	NO	NO	NO	NO	NO	97	61		82	15-24	17.3604
1315	Cacuaco	Female	NO	Bacongo	University	NO	NO	NO	NO	NO	yES	YES	NO	YES	YES	NO	NO	NO	NO	YES	NO	106	70		101	25-34
1316	Cacuaco	Female	NO	Bacongo	Primary education	NO	NO	NO	YES	NO	yES	YES	YES	YES	YES	YES	NO	NO	NO	NO	YES	174	116		89	55+	17.5781
1317	Cacuaco	Female	NO	Other	Primary education	NO	NO	NO	NO	NO	NO	NO	YES	NO	NO	YES	NO	NO	NO	NO	NO	108	67		97	15-24	20.202
1318	Cacuaco	Male	NO	Other	Primary education	YES	NO	NO	YES	NO	NO	NO	NO	YES	YES	NO	NO	NO	NO	NO		133	76		87	15-24	20.4284
1319	Cacuaco	Female	NO	Bacongo	Primary education	NO	NO	NO	YES	NO	yES	NO	NO	YES	YES	NO	NO	NO	NO	NO	NO	96	69		80	35-44	21.6128
1320	Cacuaco	Male	NO	kimbundu	Scondary education I cycle	YES	Yes, sometimes	NO	YES	NO	yES	YES	NO	NO	NO	NO	YES	NO	NO	NO	NO	110	74		71	25-34	17.2389
1321	Cacuaco	Male	NO	Umbundo	Secondary education II cycle	NO	NO	NO	YES	NO	yES	YES	YES	YES	NO	YES	NO	NO	NO	YES	NO	85	62		89	25-34	16.2453
1322	Cacuaco	Female	NO	Umbundo	Primary education	NO	Yes, sometimes	NO	YES	YES	NO	YES	YES	YES	NO	NO	NO	NO	NO	NO		104	63		90	25-34	21.0517
1323	Cacuaco	Male	NO	Other	Scondary education I cycle	YES	Yes, sometimes	NO	YES	YES	NO	NO	NO	YES	NO	NO	NO	NO	NO	NO	NO	112	66		73	25-34	19.3792
1324	Cacuaco	Female	NO	Bacongo	Secondary education II cycle	NO	No	NO	YES	NO	YES	YES	NO	YES	NO	NO	NO	NO	NO	NO	NO	98	68		73	25-34	19.8413
1325	Cacuaco	Male	NO	Bacongo	Primary education	NO	Yes, sometimes	NO	YES	YES	YES	YES	YES	YES	YES	YES	NO	NO	NO	YES	NO	115	79		85	45-54	20.1348
1326	Cacuaco	Male	NO	Umbundo		NO	Yes, sometimes	NO	YES	NO	NO	NO	NO	YES	NO	NO	NO	NO	NO	NO	NO	110	78		78	25-34	16.955
1327	Cacuaco	Male	NO	Bacongo	Scondary education I cycle	YES	No	NO	YES	NO	YES	YES	YES	YES	YES	NO	YES	NO	NO	NO	NO	108	70		99	25-34	15.5896
1328	Cacuaco	Female	NO	Umbundo	Scondary education I cycle	NO	No	NO	YES	NO	NO	NO	YES	YES	YES	YES	NO	NO	NO	NO	NO	122	83		133	15-24	15.8173
1329	Cacuaco	Female	NO	Umbundo	Primary education	NO	No	NO	YES	NO	NO	NO	YES	YES	YES	YES	NO	NO	NO	NO	NO	90	53		81	25-34	15.625
1330	Cacuaco	Male	NO	Other	Illiterate	YES	Yes, everyday	NO	YES	NO	NO	NO	YES	NO	YES	YES	NO	NO	NO	NO	NO	113	70		164	35-44	16.5861
1331	Cacuaco	Male	NO	Umbundo	University	NO	No	NO	YES	NO	NO	NO	YES	YES	NO	NO	NO	NO	NO	NO	NO	127	67		99	25-34	18.2066
1332	Cacuaco	Male	NO	Kimbundu	University	NO	No	YES	NO	NO	NO	NO	YES	NO	NO	NO	NO	NO	NO	NO	NO	109	74		81	15-24	16.1778
1333	Cacuaco	Female	NO	Kimbundu	Primary education	NO	Yes, sometimes	NO	YES	NO	YES	NO	NO	YES	NO	YES	NO	NO	NO	NO	NO	128	85		90	35-44	28.441
1334	Cacuaco	Female	NO	Kimbundu	Primary education	NO	No	NO	NO	NO	NO	YES	NO	YES	NO	YES	YES	NO	YES	YES	NO	81	60		116	35-44	13.4488
1335	Cacuaco	Male	NO	Kimbundu	Primary education	NO	Yes, everyday	NO	YES	NO	NO	NO	YES	YES	YES	NO	NO	YES	YES	NO	NO	103	66		90	45-54	18.9388
1336	Cacuaco	Male	NO	Umbundo	Scondary education I cycle	NO	No	NO	NO	NO	NO	NO	NO	NO	NO	YES	YES	NO	NO	NO	NO	133	61		93	15-24	16.2788
1337	Cacuaco	Male	NO	Bacongo	Scondary education I cycle	NO	Yes, sometimes	NO	NO	NO	NO	NO	YES	NO	NO	YES	YES	NO	NO	NO	NO	111	82		89	25-34	17.9012
1338	Cacuaco	Male	NO	Umbundo	Illiterate	YES	Yes, everyday	NO	YES	NO	NO	NO	NO	NO	NO	YES	NO	NO	YES	NO	NO	104	78		90	55+	14.2045
1339	Cacuaco	Male	NO	Kimbundu	Primary education	YES	Yes, sometimes	NO	NO	NO	NO	YES	NO	YES	NO	NO	NO	NO	NO	NO	NO	115	70		108	55+	20.5986
1340	Cacuaco	Female	NO	Umbundo	Scondary education I cycle	NO	NO	NO	YES	NO	NO	NO	YES	YES	NO	YES	NO	NO	YES	NO	NO	97	75		69	15-24	17.3134
1341	HDP	Male	NO	Bacongo	Scondary education I cycle	YES	NO	NO	YES	NO	YES	YES	NO	YES	YES	NO	NO	YES	NO	YES	NO	95	52		89	35-44	18.711
1342	HDP	Male	NO	Kimbundu	Illiterate	YES	Yes, sometimes	NO	YES	NO	YES	YES	NO	YES	NO	NO	NO	YES	NO	YES	NO	100	60		74	35-44	20.5761
1343	HDP	Female	NO	Bacongo	University	NO	Yes, sometimes	NO	NO	NO	YES	NO	NO	YES	NO	NO	NO	NO	NO	NO	NO	104	71		91	25-34	23.5883
1344	HDP	Male	NO	Bacongo	Primary education	NO	Yes, sometimes	NO	YES	NO	YES	NO	NO	YES	NO	NO	NO	NO	NO	NO	NO	97	66		124	15-24	15.4315
1345	HDP	Male	NO	Kimbundu	Primary education	YES	Yes, sometimes	NO	YES	NO	YES	NO	NO	YES	YES	YES	NO	YES	YES	NO	YES	135	80		95	25-34	19.4674
1346	HDP	Female	NO	Bacongo	Primary education	NO	No	NO	YES	NO	NO	NO	NO	YES	YES	NO	NO	NO	YES	YES	NO	86	60		107	15-24	16.6603
1347	HDP	Female	NO	Kimbundu	Primary education	NO	Yes, sometimes	NO	YES	NO	NO	YES	NO	YES	YES	NO	NO	NO	YES	YES	NO	150	100	110		45-54	32.3468
1348	HDP	Male	NO	Bacongo	Scondary education I cycle	YES	Yes, sometimes	NO	YES	NO	YES	YES	NO	YES	YES	YES	NO	YES	YES	YES	NO	89	56		91	15-24	16.2982
1349	HDP	Male	NO	Bacongo	University	YES	Yes, sometimes	NO	YES	NO	YES	YES	NO	YES	YES	NO	NO	YES	YES	YES	NO	127	73		122	25-34	18.711
1350	HDP	Female	NO	Kimbundu	Scondary education I cycle	NO	No	NO	YES	NO	YES	YES	NO	YES	YES	NO	NO	YES	YES	YES	NO	103	64	89		25-34	15.2109
1351	HDP	Female	NO	Bacongo	Secondary education II cycle	NO	No	NO	YES	NO	YES	YES	NO	YES	YES	NO	NO	YES	YES	YES	NO	93	62	146		15-24	17.898
1352	HDP	Female	NO	Bacongo	Scondary education I cycle	NO	No	NO	YES	NO	YES	YES	NO	YES	YES	NO	NO	NO	YES	YES	NO	111	68		64	15-24	19.052
1353	HDP	Male	NO	Other	University	NO	Yes, sometimes	NO	YES	NO	YES	YES	NO	YES	NO	NO	NO	YES	YES	YES	NO	125	85		94	35-44	22.1453
1354	HDP	Male	NO	Kimbundu	Scondary education I cycle	YES	yes, sometimes	NO	YES	NO	YES	YES	NO	YES	YES	NO	NO	YES	YES	YES	NO	107	77	98		35-44
1355	HDP	Male	NO	Bacongo	Scondary education I cycle	YES	Yes, sometimes	NO	YES	NO	YES	YES	NO	YES	YES	NO	NO	YES	YES	YES	NO	108	68		75	15-24	19.6283
1356	HDP	Male	NO	Kimbundu	Scondary education I cycle	NO	Yes, sometimes	NO	YES	YES	YES	YES	NO	YES	YES	NO	NO	YES	YES	YES	NO	103	65		96	35-44	26.2222
1357	HDP	Male	NO	Kimbundu	Scondary education I cycle	NO	No	NO	YES	NO	YES	YES	NO	YES	NO	NO	NO	YES	YES	YES	NO	101	64		89	15-24	17.2111
1358	HDP	Female	NO	Kimbundu	Illiterate	NO	Yes, sometimes	YES	YES	NO	YES	YES	YES	YES	YES	NO	NO	YES	YES	YES	NO	90	67	129		35-44	17.0088
1359	HDP	Female	NO	Kimbundu	Secondary education II cycle	NO	No	NO	YES	NO	YES	NO	NO	YES	YES	NO	NO	YES	YES	YES	NO	94	73	76		15-24	16.0733
1360	HDP	Male	NO	Umbundo	Secondary education II cycle	NO	No	NO	YES	NO	YES	YES	NO	YES	NO	NO	NO	YES	YES	YES	NO	129	70		85	15-24	17.4328
1361	HDP	Male	NO	Umbundo	Secondary education II cycle	NO	No	NO	YES	NO	YES	YES	NO	YES	NO	NO	NO	YES	YES	YES	NO	114	75		86	45-54	18.726
1362	HDP	Female	NO	Bacongo	Scondary education I cycle	NO	No	NO	YES	NO	YES	YES	NO	YES	NO	NO	NO	YES	YES	YES	NO	90	60		86	15-24	14.5003
1363	HDP	Female	NO	Bacongo	Secondary education II cycle	NO	No	NO	YES	NO	YES	NO	YES	YES	YES	NO	NO	YES	YES	YES	NO	97	51		83	15-24	16.6493
1364	HDP	Male	NO	Kimbundu	University	NO	Yes, sometimes	NO	NO	NO	YES	NO	NO	YES	YES	NO	NO	NO	NO	YES	NO	135	79	103		25-34	21.2031
1365	HDP	Female	NO	Bacongo	Illiterate	YES	Yes, sometimes	YES	YES	NO	YES	NO	NO	YES	YES	NO	NO	YES	YES	YES	NO	97	61	100		55+	20.3428
1366	HDP	Male	NO	Bacongo	Secondary education II cycle	YES	Yes, sometimes	NO	YES	NO	YES	YES	NO	YES	YES	NO	NO	YES	YES	YES	NO	102	72		64	25-34	17.51
1367	HDP	Male	NO	Kimbundu	Secondary education II cycle	NO	No	NO	YES	NO	YES	NO	NO	YES	YES	NO	NO	YES	YES	YES	NO	115	66	92		15-24	17.3611
1368	HDP	Male	NO	Kimbundu	Primary education	NO	No	NO	YES	NO	YES	YES	NO	YES	YES	NO	NO	YES	YES	YES	NO	89	56	87		15-24	14.6355
1369	HDP	Male	NO	Bacongo	Secondary education II cycle	YES	Yes, sometimes	NO	YES	NO	YES	YES	NO	YES	YES	NO	NO	YES	YES	YES	NO	108	67	75		35-44	18.2099
1370	HDP	Male	NO	Bacongo	Scondary education I cycle	YES	Yes, sometimes	NO	YES	NO	YES	YES	NO	YES	YES	NO	NO	YES	YES	YES	NO	146	76	83		55+	16.5289
1371	HDP	Female	NO	Kimbundu	Illiterate	NO	Yes, sometimes	NO	YES	NO	YES	YES	NO	YES	YES	NO	NO	YES	YES	YES	NO	107	54	85		35-44	17.5696
1372	HDP	Male	NO	Bacongo	Secondary education II cycle	yES	Yes, sometimes	YES	YES	NO	YES	YES	NO	YES	YES	NO	NO	YES	YES	YES	NO	82	65	159		35-44	13.6719
1373	HDP	Male	NO	Kimbundu	Primary education	NO	No	NO	YES	NO	NO	NO	NO	YES	NO	NO	NO	NO	NO	NO	NO	101	53	124		25-34	17.5556
1374	HDP	Male	NO	Bacongo	Secondary education II cycle	NO	No	YES	NO	NO	NO	NO	NO	YES	NO	NO	NO	NO	NO	NO	NO	123	58		94	15-24	17.51
1375	HDP	Male	NO	Kimbundu	Scondary education I cycle	NO	No	NO	YES	NO	NO	NO	YES	YES	YES	NO	YES	NO	NO	YES	NO	109	51		78	35-44	16.1844
1376	HDP	Male	NO	Kimbundu	Secondary education II cycle	NO	No	NO	YES	NO	NO	YES	YES	YES	NO	NO	NO	YES	YES	NO	NO	104	44	90		35-44	15.3697
1377	HDP	Male	NO	Bacongo	Secondary education II cycle	NO	No	NO	YES	NO	YES	NO	NO	YES	YES	NO	NO	NO	NO	YES	NO	115	67		109	25-34	18.5185
1378	HDP	Male	NO	Kimbundu	Secondary education II cycle	NO	No	NO	YES	NO	YES	NO	NO	YES	YES	NO	NO	YES	YES	YES	NO	104	66		68	15-24	18.1018
1379	DAT	Male	NO	Kimbundu	Secondary education II cycle			NO	YES	NO	YES	NO	NO	NO	NO	NO	NO	NO	NO	NO	NO	137	121		91	35-44	16.1415
1380	DAT	Male	NO	Kimbundu		NO	No	NO	YES	NO	YES	NO	NO	NO	NO	NO	NO	NO	NO	NO	NO	149	100		85	35-44	19.9594
1381	DAT	Female	NO	Kimbundu		NO	No	NO	YES	NO	YES	NO	NO	NO	NO	NO	NO	NO	NO	NO	NO	135	95		94	25-34	21.4844
1382	DAT	Female	NO	Umbundo		NO	No	NO	YES	YES	YES	NO	NO	YES	YES	YES	NO	NO	NO	NO	NO	99	65	92		25-34	17.7462
1384	DAT	Female	NO	Kimbundu	Scondary education I cycle	NO	Yes, sometimes	NO	YES	NO	YES	YES	YES	YES	YES	YES	NO	NO	NO	NO	NO	101	67		133	35-44	19.0677
1385	DAT	Female	NO	Kimbundu	Scondary education I cycle	NO	No	NO	YES	NO	NO	YES	YES	YES	YES	YES	NO	NO	NO	NO	NO	109	67		95	35-44
1386	DAT	Male	NO	Bacongo	Scondary education I cycle	NO	No	YES	YES	NO	YES	YES	YES	YES	YES	YES	NO	NO	NO	NO	NO	110	69		400	45-54	19.2277
1387	DAT	Male	NO	Umbundo	Scondary education I cycle	NO	Yes, sometimes	YES	YES	NO	YES	YES	NO	NO	YES	YES	NO	NO	NO	NO	NO	111	76		123	35-44	30.4705
1388	DAT	Female	NO	Kimbundu	Scondary education I cycle	NO	No	NO	YES	NO	YES	YES	NO	YES	YES	YES	NO	NO	NO	NO	NO	86	67		101	15-24	16.0229
1389	DAT	Male	NO	Bacongo	Scondary education I cycle	NO	No	YES	YES	NO	YES	YES	YES	YES	YES	YES	NO	NO	NO	NO	NO	128	56		110	45-54	30.4367
1390	DAT	Male	NO	Kimbundu	Secondary education II cycle	NO	No	NO	YES	NO	YES	YES	YES	YES	YES	YES	NO	NO	YES	YES	NO	144	82		136	55+	22.6003
1391	DAT	Male	NO	Kimbundu	Scondary education I cycle	NO	No	NO	YES	NO	YES	NO	NO	NO	NO	NO	NO	NO	NO	NO	NO	125	85	104		55+	24.3911
1392	DAT	Male	NO	Kimbundu		NO	No	YES	YES	NO	YES	NO	NO	NO	NO	NO	NO	NO	NO	NO		111	84	117		25-34	17.9151
1393	DAT	Male	NO	Kimbundu		NO	No	YES	YES	NO	YES	NO	NO	NO	NO	NO	NO	NO	NO	NO	NO	72	53		86	35-44	15.173
1394	DAT	Male	NO	Kimbundu	Illiterate	NO	No	NO	YES	NO	YES	NO	NO	NO	NO	NO	NO	NO	NO	NO	NO	101	57		91	55+	20.4382
1395	DAT	Female	NO	Umbundo	Scondary education I cycle	NO	No	YES	YES	NO	YES	NO	NO	NO	NO	NO	NO	NO	NO	NO	NO	129	87		88	35-44	25.8065
1396	DAT	Female	NO	Umbundo	Scondary education I cycle	NO	No	NO	YES	NO	YES	NO	NO	NO	NO	NO	NO	NO	NO	NO	NO	121	78		97	35-44	28.3266
1397	DAT	Female	NO	Umbundo		NO	No	NO	YES	NO	YES	NO	NO	NO	NO	NO	NO	NO	NO	NO	NO	101	65		84	15-24	19.9573
1398	DAT	Female	NO	Kimbundu		NO	No	YES	YES	NO	YES	NO	NO	NO	NO	NO	NO	NO	NO	NO	NO	101	65		112	35-44	12.5497
1399	DAT	Female	NO	Bacongo	Primary education	NO	No	YES	YES	NO	YES	NO	NO	NO	NO	NO	NO	NO	NO	NO	NO	127	90		141	55+	22.6757
1400	DAT	Male	NO	Kimbundu	Scondary education I cycle	YES	Yes, sometimes	NO	YES	NO	YES	YES	YES	YES	YES	YES	YES	YES	YES	YES	NO	103	57		117	15-24	15.5896
1401	DAT	Male	NO	Kimbundu	Scondary education I cycle	NO	No	NO	YES	NO	YES	NO	NO	NO	NO	NO	NO	NO	NO	NO	NO	103	43	103		15-24	16.955
1402	DAT	Female	NO	Umbundo	Secondary education II cycle	NO	No	YES	YES	NO	YES	NO	NO	NO	NO	NO	NO	NO	NO	NO	NO	94	54		57	15-24	18.9745
1403	DAT	Male	NO	Kimbundu	Primary education	NO	No	NO	YES	NO	YES	YES	YES	YES	YES	YES	YES	YES	YES	YES	NO	115	57		87	15-24	20.7031
1404	DAT	Female	NO	Bacongo	Primary education	NO	No	NO	YES	NO	YES	YES	YES	YES	YES	YES	YES	YES	YES	YES	NO	122	72		117	45-54
1405	DAT	Male	NO	Kimbundu	Scondary education I cycle	YES	Yes, sometimes	YES	YES	NO	YES	YES	NO	YES	YES	YES	YES	YES	YES	YES	YES	150	100		100	45-54
1406	DAT	Female	NO	Umbundo	Illiterate	NO	No	YES	YES	NO	YES	NO	NO	NO	NO	NO	NO	NO	NO	NO	NO	112	61		83	25-34	16.6525
1407	DAT	Female	NO	Kimbundu		NO	No	NO	YES	NO	YES	NO	NO	NO	NO	NO	NO	NO	NO	NO	NO	105	64	104		35-44	25
1408	DAT	Male	NO	Umbundo		NO	No	YES	NO	NO	NO	NO	NO	NO	NO	NO	NO	NO	NO	NO	NO	113	67	86		25-34	17.9089
1409	DAT	Male	NO	Kimbundu	Scondary education I cycle	YES	Yes, sometimes	NO	YES	NO	YES	YES	NO	YES	YES	NO	YES	YES	YES	YES	NO	99	65		120	35-44	20.9573
1410	DAT	Female	NO	Umbundo		NO	No	YES	YES	NO	YES	NO	NO	NO	NO	NO	NO	NO	NO	NO	NO	90	49		90	35-44	17.7557
1411	DAT	Male	NO	Umbundo		YES	No	NO	YES	NO	YES	NO	NO	NO	NO	NO	NO	NO	NO	NO	NO	116	74		92	35-44	21.5645
1412	DAT	Male	NO	Kimbundu		NO	No	NO	YES	NO	YES	NO	NO	NO	NO	NO	NO	NO	NO	NO	NO	110	66		76	25-34	17.8465
1413	DAT	Female	NO	Bacongo		NO	No	NO	YES	NO	YES	NO	NO	NO	NO	NO	NO	NO	NO	NO	NO	122	91		89	25-34	25.0762
1414	DAT	Female	NO	Kimbundu		NO	No	NO	YES	NO	YES	NO	NO	NO	NO	NO	NO	NO	NO	NO	NO	131	72		106	25-34	19.3821
1415	DAT	Male	NO	Kimbundu	Primary education	NO	No	NO	YES	NO	YES	NO	NO	NO	NO	NO	NO	NO	NO	NO	NO	125	85		84	25-34	19.5354
1416	DAT	Male	NO	Kimbundu		NO	No	NO	YES	NO	YES	NO	NO	NO	NO	NO	NO	NO	NO	NO	NO	122	67	117		15-24	17.9282
1417	DAT	Male	NO	Kimbundu		NO	Yes, sometimes	YES	YES	YES	NO	YES	NO	NO	NO	NO	NO	NO	NO	NO	NO	115	95		103	25-34	22.7583
1418	DAT	Male	NO	Kimbundu		YES	Yes, sometimes	NO	YES	NO	YES	NO	NO	NO	NO	NO	NO	NO	NO	NO	NO	122	53		83	15-24	17.7154
1419	DAT	Male	NO	Umbundo		NO	Yes, sometimes	YES	YES	NO	YES	NO	NO	NO	NO	NO	NO	NO	NO	NO	NO	179	112		90	25-34	18.7783
1420	DAT	Male	NO	Kimbundu	Secondary education II cycle	NO	No	NO	YES	NO	YES	NO	NO	NO	NO	NO	NO	NO	NO	NO	NO	98	73	103		15-24	18.3058
1421	DAT	Female	NO	Kimbundu		NO	No	YES	YES	NO	YES	NO	NO	NO	NO	NO	NO	NO	NO	NO	NO	129	80		93	25-34	18.0662
1422	DAT	Female	NO	Kimbundu	Primary education	NO	Yes, sometimes	NO	YES	NO	YES	NO	NO	NO	NO	NO	NO	NO	NO	NO	NO	126	86	91		15-24	22.0317
1423	DAT	Male	NO	Kimbundu	University	YES	No	NO	YES	NO	YES	NO	NO	NO	NO	NO	NO	NO	NO	NO	NO	108	68		142	45-54
1424	DAT	Female	NO	Kimbundu	Primary education	NO	No	NO	YES	NO	YES	NO	NO	NO	NO	NO	NO	NO	NO	NO	NO	137	79	119		45-54	25.4767
1425	DAT	Male	NO			YES	Yes, sometimes	YES	YES	NO	YES	NO	NO	NO	NO	NO	NO	NO	NO	NO	NO	91	61	80		25-34	16.6525
1426	DAT	Male	NO	Umbundo	Scondary education I cycle	NO	No	YES	YES	NO	YES	NO	NO	NO	NO	NO	NO	NO	NO	NO	NO	95	69		89	35-44	14.8502
1427	DAT	Female	NO	Umbundo	Secondary education II cycle	NO	No	YES	YES	NO	YES	NO	NO	YES	NO	NO	NO	NO	NO	YES	NO	136	101		85	45-54	24.093
1428	DAT	Female	NO	Kimbundu	Secondary education II cycle	NO	No	NO	YES	NO	YES	NO	NO	YES	NO	NO	NO	NO	NO	YES	NO	109	72		89	25-34	14.0051
1429	DAT	Female		Kimbundu	Secondary education II cycle	NO	No	NO	YES	NO	YES	NO	NO	YES	NO	NO	NO	NO	NO	NO	NO	106	74		72	15-24	18.5178
1430	DAT	Female		Kimbundu	Illiterate	NO	No	NO	YES	NO	YES	NO	NO	YES	NO	NO	NO	NO	NO	YES	NO	92	60		113	55+	13.219
1431	DAT	Male	NO	Bacongo	Primary education	NO	No	NO	YES	YES	YES	YES	YES	YES	YES	YES	YES	YES	YES	YES	NO	148	85		382	55+	18.4139
1432	DAT	Female	NO	Kimbundu	Primary education	NO	No	YES	YES	NO	YES	NO	NO	YES	NO	NO	NO	NO	NO	YES	YES	240	119		101	55+	28.5075
1433	DAT	Female	NO	Kimbundu	Primary education	NO	No	YES	YES	NO	NO	NO	NO	YES	NO	NO	NO	NO	NO	NO	NO	96	55	90		35-44	18.0697
1434	DAT	Female	NO	Bacongo	Primary education	NO	No	NO	YES	YES	YES	YES	YES	YES	YES	YES	NO	NO	NO	YES	NO	221	115		96	55+	32.4062
1435	DAT	Female	NO	Kimbundu	Illiterate	NO	No	NO	NO	NO	YES	NO	NO	YES	NO	NO	NO	NO	NO	YES	NO	127	83		147	55+	27.8852
1436	DAT	Female	NO	Kimbundu	University	NO	Yes, sometimes	NO	YES	NO	NO	NO	NO	YES	NO	NO	NO	NO	NO	YES	YES	150	85		102	45-54	31.2314
1437	DAT	Female	NO	Umbundo	Scondary education I cycle	NO	No	YES	NO	NO	YES	NO	NO	NO	NO	NO	NO	NO	NO	NO	NO				115	35-44	45.9137
1438	DAT	Female	NO	Kimbundu	Primary education	NO	Yes, sometimes	YES	YES	NO	YES	NO	NO	YES	NO	NO	NO	NO	NO	YES	NO	123	69		82	25-34	20.9042
1439	DAT	Female	NO	Kimbundu	Secondary education II cycle	NO	Yes, sometimes	NO	YES	NO	NO	NO	NO	YES	NO	NO	NO	NO	NO	YES	NO	129	85		108	55+	33.3108
1440	DAT	Female	NO	Kimbundu	Primary education	NO	No	NO	YES	NO	NO	NO	NO	YES	NO	NO	NO	NO	NO	NO	NO	105	81		92	25-34	22.7694
1441	DAT	Male	NO	Kimbundu	Illiterate	NO	Yes, sometimes	NO	YES	YES	YES	YES	YES	YES	YES	YES	NO	NO	NO	YES	NO	112	83		112	55+	23.3726
1442	DAT	Female	NO	Kimbundu	Primary education	NO	No	NO	NO	NO	YES	NO	NO	YES	NO	NO	NO	NO	NO	NO	NO		92		94	35-44	31.2175
1443	DAT	Female	NO	Kimbundu	Scondary education I cycle	NO	No	NO	YES	NO	YES	NO	NO	YES	NO	NO	NO	NO	NO	YES	NO	129	85		84	45-54	39.1434
1444	DAT	Male	NO	Kimbundu	Primary education	YES	Yes, sometimes	NO	NO	NO	YES	NO	NO	YES	NO	NO	NO	NO	NO	YES	NO	108	55		118	55+	20.3244
1445	DAT	Male	NO	Bacongo	University	NO	Yes, sometimes	YES	YES	NO	YES	NO	NO	YES	NO	NO	NO	NO	NO	YES	NO	116	84	123		25-34	19.199
1446	DAT	Male	NO	Kimbundu	University	NO	Yes, sometimes	NO	NO	NO	NO	NO	NO	NO	NO	NO	NO	NO	NO	NO	NO	128	80	97		25-34	23.8367
1447	DAT	Male	NO	Kimbundu	University	NO	No	YES	YES	NO	YES	NO	NO	YES	NO	NO	NO	NO	NO	YES	NO	95	65	117		45-54	23.9995
1448	Cariango	Male	NO	Kimbundu	Primary education	NO	Yes, sometimes	NO	YES	NO	NO	YES	YES	YES	YES	YES	YES	YES	YES	YES	NO	98	78		103	45-54	15.0555
1449	Cariango	Male	NO	Kimbundu	Primary education	NO	No	NO	YES	NO	NO	YES	NO	YES	NO	NO	YES	YES	YES	YES	NO	116	81		88	25-34	17.8748
1450	Cariango	Male	NO	Kimbundu	Scondary education I cycle	NO	Yes, sometimes	NO	YES	NO	NO	NO	NO	YES	NO	YES	NO	NO	NO	NO	NO	150	104		86	45-54	18.5901
1451	Cariango	Female	NO	Bacongo	Primary education	NO	Yes, sometimes	NO	YES	NO	YES	YES	YES	NO	NO	YES	YES	YES	YES	YES	NO	106	72		88	35-44	19.6283
1452	Cariango	Female	NO	Kimbundu	Primary education	NO	No	YES	YES	YES	YES	YES	YES	YES	NO	YES	NO	NO	YES	YES	YES	133	89		90	45-54	23.0112
1453	Cariango	Female	NO	Kimbundu	Illiterate			NO	YES	NO	YES	YES	NO	YES	YES	YES	NO	NO	NO	YES	YES	167	81		102	55+	30.8532
1454	Cariango	Female	NO	Other	Secondary education II cycle		No	YES	NO	NO	NO	YES	NO	YES	NO	YES	NO	NO	YES	NO	NO	118	67		88	25-34	22.3214
1455	Cariango	Female	NO	Kimbundu	Scondary education I cycle	NO	No	NO	YES	NO	YES	YES	YES	YES	YES	YES	NO	NO	YES	YES	NO	110	88		89	35-44	23.9188
1456	Cariango	Female	NO	Kimbundu	Scondary education I cycle	NO	No	NO	YES	NO	YES	NO	NO	NO	NO	NO	NO	NO	NO	NO	NO	111	70	96		25-34	25.1532
1457	Cariango	Female	NO	Kimbundu	Scondary education I cycle	NO	No	YES	YES	NO	NO	NO	NO	NO	NO	NO	NO	NO	NO	YES	NO	93	63		87	15-24	15.0474
1458	Cariango	Female	NO	Umbundo	Primary education	NO	No	NO	NO	NO	NO	NO	NO	YES	NO	YES	NO	NO	NO	YES	NO	128	74		76	15-24	19.0443
1459	Cariango	Male	NO	Kimbundu	Scondary education I cycle	YES	Yes, everyday	NO	YES	NO	YES	YES	YES	YES	YES	YES	YES	NO	YES	YES	YES	124	87		98	45-54	19.487
1460	Cariango	Female	NO	Kimbundu	Secondary education II cycle	NO	No	NO	YES	NO	YES	YES	NO	NO	NO	YES	NO	NO	NO	NO	NO	100	72		84	15-24	19.3962
1461	Cariango	Female	NO	Kimbundu	Primary education	NO	No	NO	YES	NO	YES	YES	NO	YES	NO	YES	NO	NO	YES	YES	NO	93	62		80	25-34	29.0816
1462	Cariango	Female	NO	Kimbundu	Primary education	NO	Yes, sometimes	NO	YES	YES	NO	YES	NO	YES	YES	YES	NO	NO	YES	NO	NO	109	76		85	25-34	21.83
1463	Cariango	Male	NO	Kimbundu	Secondary education II cycle	NO	Yes, sometimes	NO	YES	YES	NO	YES	NO	NO	NO	NO	NO	NO	NO	NO	NO	113	73		98	25-34	25.4694
1464	Cariango	Female	NO	Kimbundu	Illiterate	NO	No	NO	NO	NO	YES	YES	YES	YES	YES	YES	NO	NO	NO	YES	YES	214	109		129	55+	26.2227
1465	Cariango	Male	NO	Bacongo	Secondary education II cycle	NO	No	NO	NO	NO	NO	NO	NO	YES	NO	YES	NO	NO	NO	NO	NO	105	51		92	15-24
1466	Cariango	Male	NO	Umbundo	Secondary education II cycle	NO	No	YES	NO	YES	NO	NO	NO	NO	NO	NO	NO	NO	NO	YES	NO	100	59		81	25-34	22.1297
1467	Cariango	Male	NO	Kimbundu	Scondary education I cycle	NO	Yes, sometimes	NO	YES	NO	YES	YES	YES	YES	YES	YES	YES	YES	YES	NO	NO	100	65		81	25-34	16.6525
1468	Cariango	Female	NO	Kimbundu	Secondary education II cycle	NO	No	NO	YES	NO	NO	YES	NO	YES	NO	NO	NO	NO	NO	YES	NO	127	81		98	25-34	30.4076
1469	Cariango	Male	NO	Kimbundu	Scondary education I cycle	NO	No	NO	NO	NO	YES	NO	NO	NO	NO	NO	NO	NO	NO	YES	NO	101	54		150	15-24	18.6851
1470	Cariango	Male	NO	Kimbundu	Secondary education II cycle	NO	Yes, sometimes	NO	YES	NO	YES	YES	YES	YES	NO	YES	NO	NO	YES	NO	NO	79	51		106	15-24	17.8359
1471	Cariango	Female	NO	Kimbundu	Scondary education I cycle	NO	No	NO	NO	NO	YES	NO	NO	YES	NO	YES	NO	YES	NO	YES	NO	150	92		98	25-34	39.3503
1472	Cariango	Female	NO	Kimbundu	Secondary education II cycle	NO	No	YES	YES	NO	NO	NO	NO	NO	NO	NO	NO	NO	NO	YES	NO	110	60		121	15-24	14.5682
1473	Cariango	Male	NO	Kimbundu	Scondary education I cycle	NO	No	YES	NO	NO	YES	NO	NO	YES	NO	YES	NO	NO	NO	NO	NO	112	81		100	25-34	19.6052
1474	Cariango	Female	NO	Kimbundu	Primary education	NO	No	NO	YES	NO	NO	YES	YES	NO	YES	NO	YES	NO	NO	YES	YES	106	79		101	55+	21.9261
1475	Cariango	Male	NO	Kimbundu	Primary education	NO	No	NO	YES	NO	YES	YES	YES	YES	YES	YES	YES	YES	NO	NO	YES	125	53	93		25-34	19.0451
1476	Cariango	Female	NO	Kimbundu	Primary education	NO	No	NO	NO	NO	YES	YES	NO	YES	YES	YES	NO	NO	YES	YES	NO	98	65		89	15-24	21.6041
1477	Cariango	Female	NO	Kimbundu	Secondary education II cycle	NO	No	NO	NO	NO	NO	YES	YES	NO	YES	YES	YES	NO	YES	YES	YES	114	79		96	25-34	22.0317
1478	Cariango	Male	NO	Kimbundu	Secondary education II cycle	NO	Yes, sometimes	NO	YES	NO	YES	YES	YES	YES	NO	YES	YES	YES	NO	YES	NO	97	71		71	25-34	17.0993
1479	Cariango	Male	NO	Bacongo	Primary education	NO	No	NO	YES	NO	YES	NO	YES	YES	YES	YES	NO	YES	NO	YES	NO	103	73		90	15-24	27.551
1480	Cariango	Female	NO	Kimbundu	Secondary education II cycle	NO	No	NO	YES	YES	YES	YES	YES	YES	YES	YES	YES	NO	NO	YES	NO	100	71		83	25-34	24.7768
1481	Cariango	Female	NO	Bacongo	University	NO	No	YES	YES	NO	NO	NO	NO	YES	NO	YES	NO	NO	NO	YES	NO	96	71		104	15-24	17.4818
1482	Cariango	Female	NO	Kimbundu	Primary education	YES	Yes, sometimes	NO	YES	NO	NO	NO	NO	YES	YES	NO	NO	NO	YES	NO	NO	116	75		111	45-54	26.2336
1483	Cariango	Female	NO	Kimbundu	Primary education	NO	Yes, sometimes	NO	YES	NO	YES	YES	YES	NO	NO	YES	YES	NO	YES	YES	NO	140	69		90	55+	20.6612
1484	Cariango	Female	NO	Kimbundu	Secondary education II cycle	YES	Yes, sometimes	NO	YES	YES	YES	YES	YES	YES	YES	YES	YES	YES	YES	NO	NO	114	74		76	25-34	27.0993
1485	Cariango	Male	NO	Kimbundu	Scondary education I cycle	YES	Yes, sometimes	NO	YES	NO	YES	NO	NO	YES	NO	NO	YES	NO	YES	NO	NO	111	68		87	45-54
1486	Cariango	Male	NO	Bacongo	University	NO	No	NO	YES	NO	YES	YES	NO	YES	NO	YES	NO	NO	NO	YES	NO	104	68		132	15-24
1487	Cariango	Male	NO	Kimbundu	Secondary education II cycle	NO	Yes, sometimes	NO	YES	NO	YES	YES	YES	YES	YES	YES	NO	NO	NO	YES	NO	98	70		97	35-44	18.9619
1488	Cariango	Female	NO	Umbundo	Secondary education II cycle	NO	No	NO	YES	NO	YES	NO	YES	YES	NO	YES	NO	NO	NO	YES	NO	111	65		86	15-24	16.0256
1489	Cariango	Female	NO	Kimbundu	Scondary education I cycle	NO	No	NO	YES	YES	YES	YES	YES	YES	YES	YES	NO	NO	NO	NO	NO	102	75		93	25-34	16.4236
1490	Cariango	Male	NO	Kimbundu	Primary education	NO	No	YES	YES	NO	YES	NO	NO	NO	NO	NO	YES	NO	NO	YES	YES	133	86		64	25-34	16.0256
1491	Cariango	Male	NO	Kimbundu	Scondary education I cycle	NO	No	NO	YES	NO	NO	YES	NO	YES	NO	YES	YES	YES	NO	NO	NO	129	76	99		25-34	26.2596
1492	Cariango	Female	NO	Other	University	NO	No	NO	YES	NO	YES	YES	YES	YES	YES	NO	NO	YES	YES	YES	NO	105	70		86	25-34	17.3604
1493	Cariango	Male	NO	Other	Secondary education II cycle	NO	No	NO	YES	NO	NO	YES	YES	YES	YES	YES	NO	NO	YES	NO	NO	104	56		81	25-34	17.5781
1494	Cariango	Female	NO	Kimbundu	Primary education	NO	No	NO	YES	NO	YES	YES	NO	YES	YES	YES	YES	YES	YES	NO	YES	164	93		88	45-54	27.6361
1495	Cariango	Female	NO	Kimbundu	Illiterate	NO	No	NO	YES	NO	YES	NO	YES	YES	YES	YES	NO	NO	NO	YES	YES	213	162		88	55+	36.9796
1496	Cariango	Female	NO	Kimbundu	Primary education	NO	No	YES	NO	NO	YES	YES	NO	YES	NO	YES	NO	YES	YES	YES	NO	168	113		70	45-54
1497	Cariango	Female	NO	Kimbundu	Primary education	NO	No	YES	YES	NO	YES	YES	YES	YES	NO	YES	NO	NO	YES	NO	NO	169	115		123	35-44	30.0433
1498	Cariango	Female	NO	Kimbundu	Scondary education I cycle	NO	Yes, sometimes	NO	YES	YES	NO	YES	YES	NO	YES	YES	NO	YES	YES	YES	NO	113	64		77	25-34	21.83
1499	Cariango	Female	NO	Kimbundu	Scondary education I cycle	NO	No	NO	YES	NO	YES	YES	YES	YES	NO	YES	NO	NO	NO	NO	NO	134	80		85	15-24	18.8271
1500	Cariango	Male	NO	Bacongo	Secondary education II cycle	YES	Yes, sometimes	NO	YES	NO	YES	YES	NO	YES	NO	YES	NO	YES	NO	NO	NO	108	70		90	25-34	23.3234
1501	Cariango	Male	NO	Kimbundu	Scondary education I cycle	NO	No	NO	YES	NO	YES	YES	NO	YES	YES	NO	NO	NO	NO	YES	NO	132	94		90	35-44	18.1955
1502	Cariango	Male	NO	Umbundo		NO	No	NO	YES	YES	YES	YES	YES	NO	YES	NO	YES	NO	YES	NO	NO				103	45-54	18.5568
1503	Cariango	Female	NO	Kimbundu	Scondary education I cycle	NO	No	NO	NO	NO	NO	NO	NO	NO	NO	YES	NO	NO	YES	NO	NO	125	70		87	15-24	16.0231
1504	Cariango	Male	NO	Kimbundu	Scondary education I cycle	NO	No	NO	YES	NO	YES	YES	NO	YES	YES	NO	YES	YES	YES	YES	NO	129	87		121	25-34	16.038
1505	Cariango	Female	NO	Kimbundu	Scondary education I cycle	NO	No	NO	YES	NO	YES	YES	YES	YES	YES	YES	NO	YES	NO	YES	YES	125	114		90	25-34
1506	Cariango	Female	NO	Kimbundu	Scondary education I cycle	NO	No	NO	YES	NO	YES	NO	NO	YES	YES	YES	NO	NO	YES	YES	NO	92	56		135	15-24	15.0457
1507	Cariango	Female	NO	Kimbundu	Secondary education II cycle	NO	No	NO	YES	NO	YES	YES	YES	YES	YES	YES	NO	YES	YES	YES	NO				101	15-24	17.6898
1508	Cariango	Female	NO	Kimbundu	Scondary education I cycle	NO	No	NO	YES	NO	YES	YES	YES	YES	YES	YES	YES	YES	YES	NO	NO	106	77		100	35-44	18.9036
1509	Cariango	Female	NO	Kimbundu	Scondary education I cycle	NO	Yes, sometimes	NO	YES	NO	NO	NO	YES	YES	NO	NO	NO	NO	NO	NO	YES	187	132		74	25-34	27.1918
1510	Cariango	Female	NO	Kimbundu	Scondary education I cycle	NO	No	NO	YES	NO	YES	YES	YES	YES	NO	NO	YES	NO	NO	NO	NO	106	69		91	45-54	20.0773
1511	Cariango	Female	NO		Scondary education I cycle	NO	No	NO	YES	NO	YES	YES	YES	YES	YES	YES	NO	YES	NO	NO	NO	122	79		87	15-24	19.4674
1512	Cariango	Female	NO	Kimbundu	Primary education	NO	No	YES	NO	NO	YES	YES	NO	YES	YES	YES	NO	YES	YES	YES	NO	108	66		95	45-54	30.863
1513	Cariango	Female	NO	Kimbundu	Illiterate	NO	No	NO	YES	NO	NO	YES	NO	YES	YES	YES	NO	NO	NO	YES	NO	110	70		87	55+
1817	Cariango	Male	NO	Kimbundu	Secondary education II cycle	NO	No	NO	YES	NO	YES	YES	YES	YES	NO	YES	YES	YES	NO	YES	NO				288	25-34	11.6127
1515	Cariango	Female	NO	Kimbundu	Scondary education I cycle	NO	No	YES	NO	NO	NO	NO	YES	NO	YES	NO	YES	YES	NO	NO	NO	142	102		85	25-34	21.0962
1516	Cariango	Female	NO	Kimbundu	Primary education	NO	No	NO	YES	NO	YES	YES	NO	YES	YES	YES	YES	NO	NO	YES	YES	124	84		75	25-34	24.7409
1517	Cariango	Female	NO	Kimbundu		NO	Yes, sometimes	NO	YES	NO	YES	YES	NO	YES	NO	YES	YES	YES	YES	YES	NO	110	40		57	25-34	15.7943
1518	Cariango	Female	NO	Kimbundu	Scondary education I cycle	NO	No	YES	NO	NO	NO	NO	NO	YES	NO	NO	NO	NO	NO	NO	YES	108	63		78	45-54	20.7031
1519	Cariango	Male	NO	Kimbundu	Primary education	YES		NO	YES	NO	NO	NO	YES	NO	NO	YES	YES	YES	YES	NO	NO	110	77		103	25-34	17.4413
1520	Cariango	Male	NO	Kimbundu	Secondary education II cycle	NO	No	NO	YES	NO	YES	YES	NO	YES	YES	NO	NO	NO	YES	YES	NO	89	56		99	25-34	19.3337
1521	Cariango	Female	NO	Kimbundu	Secondary education II cycle	NO	No	NO	YES	NO	NO	YES	NO	YES	NO	NO	NO	NO	YES	NO	YES	124	85		78	35-44	23.4586
1522	Cariango	Male	NO	Kimbundu	Secondary education II cycle	NO	Yes, sometimes	NO	YES	YES	YES	YES	YES	YES	YES	YES	NO	NO	YES	YES	NO	115	62		83	15-24	17.3611
1523	Cariango	Male	NO	Kimbundu		NO	No	NO	YES	YES	YES	NO	NO	YES	NO	YES	NO	NO	NO	NO	YES	124	80		98	15-24	17.5064
1524	Cariango	Male	NO	Kimbundu	Secondary education II cycle	NO	Yes, sometimes	NO	YES	YES	YES	NO	NO	YES	YES	NO	NO	NO	YES	NO	NO	112	67		56	15-24	17.5056
1525	Cariango	Male	NO	Bacongo	Scondary education I cycle	NO	No	NO	YES	NO	YES	NO	YES	YES	NO	YES	NO	NO	YES	NO	NO	104	72		74	15-24	17.7086
1526	Cariango	Male	NO	Kimbundu	Primary education	NO	No	NO	YES	NO	NO	NO	NO	YES	NO	YES	NO	YES	NO	NO	NO	109	71		77	45-54	19.9594
1527	Cariango	Male	NO	Kimbundu	Primary education	YES	Yes, sometimes	NO	YES	NO	NO	YES	YES	YES	NO	YES	YES	NO	YES	YES	YES	92	79		127	45-54	15.6046
1528	Cariango	Male	NO	Bacongo	Secondary education II cycle	NO	Yes, sometimes	YES	YES	YES	NO	NO	NO	YES	NO	NO	NO	NO	NO	NO	NO	116	83	84		25-34	16.4153
1529	Cariango	Male	NO	Kimbundu	Scondary education I cycle	NO	Yes, sometimes	YES	YES	NO	NO	NO	YES	NO	NO	NO	YES	YES	YES	NO	NO	93	52		106	25-34	16.1844
1530	Cariango	Male	NO	Other	Scondary education I cycle	NO	Yes, sometimes	YES	YES	NO	YES	NO	NO	YES	NO	YES	YES	YES	YES	YES	NO	118	75		106	25-34	17.3604
1531	Cariango	Female	NO	Kimbundu	Secondary education II cycle	NO	No	NO	YES	NO	NO	NO	YES	YES	NO	YES	YES	NO	NO	NO	NO	106	78		84	15-24	20.3428
1532	Cariango	Female	NO	Bacongo	Primary education	NO	No	NO	YES	NO	NO	NO	NO	YES	YES	YES	NO	YES	NO	YES	NO	129	77		100	35-44	19.91
1533	Cariango	Male	NO	Kimbundu	Scondary education I cycle	YES	Yes, sometimes	NO	NO	NO	NO	NO	YES	YES	NO	NO	NO	NO	YES	NO	NO	103	45		78	15-24	18.424
1534	Cariango	Male	NO	Kimbundu	Scondary education I cycle	NO		YES	YES	NO	YES	NO	NO	YES	NO	YES	YES	NO	NO	NO	NO	137	80		74	25-34	22.4059
2575	Cariango	Female	NO	Kimbundu	Primary education	NO	No	NO	YES	NO	YES	NO	NO	YES	NO	NO	YES	YES	NO	YES	YES	71	41		93	55+	27.0552
1536	Cariango	Male	NO	Kimbundu	Scondary education I cycle	NO	Yes, sometimes	NO	YES	NO	NO	NO	NO	YES	YES	NO	YES	NO	YES	NO	NO	108	69		94	35-44	17.9282
1537	Cariango	Male	NO	Kimbundu	Secondary education II cycle	NO	No	NO	YES	NO	YES	YES	YES	YES	YES	YES	YES	YES	YES	YES	NO	95	55		96	15-24	18.6709
1538	Cariango	Female	NO	Kimbundu	Illiterate	YES	No	YES	NO	NO	YES	NO	NO	YES	YES	NO	YES	YES	YES	NO	NO	142	75		103	45-54	28.8415
1539	Cariango	Female	NO	Kimbundu	Primary education	NO	No	NO	YES	YES	YES	YES	YES	YES	YES	YES	YES	YES	YES	YES	YES	109	86		99	35-44	19.736
1540	Cariango	Female	NO	Kimbundu	Illiterate	NO	No	NO	YES	YES	NO	YES	NO	YES	NO	NO	NO	NO	YES	NO	NO	96	61		97	55+	23.9224
1541	Cariango	Female	NO	Bacongo	Scondary education I cycle	YES	No	NO	YES	NO	YES	YES	YES	YES	YES	NO	NO	NO	YES	YES	YES	99	60		94	25-34	17.6471
1542	Cariango	Female	NO	Kimbundu	Primary education	NO	No	NO	YES	NO	YES	YES	YES	YES	NO	YES	YES	YES	NO	YES	YES	105	75	102		25-34	21.1927
1543	Cariango	Male	NO	Kimbundu	Scondary education I cycle	YES	Yes, sometimes	YES	YES	YES	NO	YES	NO	YES	NO	YES	YES	YES	NO	YES	NO	107	69		67	25-34	16.8962
1544	Cariango	Male	NO	Kimbundu	Scondary education I cycle	NO	Yes, sometimes	NO	YES	NO	NO	NO	NO	NO	NO	NO	NO	NO	NO	NO	NO	110	70		98	15-24	15.0551
1545	Cariango	Female	NO	Kimbundu	Primary education	NO	No	NO	YES	NO	YES	YES	YES	YES	NO	YES	NO	NO	NO	YES	NO	112	74		81	15-24	23.9188
1546	Cariango	Male	NO	Kimbundu	Scondary education I cycle	NO	No	NO	YES	NO	YES	NO	NO	NO	NO	NO	NO	NO	NO	NO	NO	150	117		114	25-34	24.8016
3316	Cariango	Female	NO	Kimbundu	Illiterate	NO	No	NO	YES	NO	YES	YES	NO	YES	YES	NO	YES	YES	YES	NO	YES	186	119		234	35-44	30.4832
1548	DAT	Male	NO	Kimbundu			No	NO	NO	YES	NO	YES	NO	NO	NO	NO	NO	NO	NO	NO	NO	119	81		90	15-24	19.9481
1549	DAT	Female	NO	Umbundo		YES	Yes, sometimes	YES	NO	YES	NO	NO	NO	NO	NO	NO	NO	NO	NO	NO	NO	108	60		98	45-54
1550	DAT	Female	NO	Bacongo		NO	No	NO	YES	NO	YES	NO	NO	NO	NO	NO	NO	NO	NO	NO	NO	112	48			15-24	17.7462
1551	DAT	Male	NO	Kimbundu	Scondary education I cycle	NO	No	NO	YES	NO	YES	YES	NO	YES	YES	YES	YES	YES	YES	YES	NO	150	73		70	15-24	17.5064
1552	DAT	Male	NO	Kimbundu	Scondary education I cycle	nO	No	NO	YES	YES	YES	YES	YES	YES	YES	YES	NO	YES	YES	YES	NO	144	70		95	35-44	15.6087
3587	Cariango	Female	NO	Kimbundu	Secondary education II cycle	NO	No	NO	YES	YES	YES	YES	NO	NO	YES	NO	YES	NO	NO	YES	NO	111	75		82	15-24	17.4747
1554	DAT	Male	NO	Kimbundu	Scondary education I cycle	NO	Yes, sometimes	NO	YES	NO	YES	NO	NO	NO	NO	NO	NO	NO	NO	NO	NO	96	65		76	35-44	18.0092
1555	DAT	Male	NO	Kimbundu	Secondary education II cycle	NO	No	NO	YES	NO	YES	YES	YES	YES	YES	NO	YES	YES	YES	YES	NO	136	98		70	45-54
1556	Cariango	Female	NO	Kimbundu	Illiterate	NO	No	NO	YES	NO	YES	YES	NO	YES	YES	YES	NO	YES	YES	YES	NO	142	94		92	55+
1557	DAT	Male	NO	Bacongo		NO	No	YES	YES	NO	YES	NO	NO	NO	NO	NO	NO	NO	NO	NO	NO	150	90		94	35-44	21.2953
1558	DAT	Male	NO	Kimbundu	Primary education	NO	No	NO	YES	NO	YES	YES	YES	YES	YES	YES	YES	YES	YES	YES	NO	155	101		153	55+	26.0262
1559	DAT	Male	NO	Kimbundu	Primary education	NO	Yes, sometimes	NO	YES	YES	YES	YES	YES	YES	YES	YES	YES	YES	YES	YES	NO	140	79		88	25-34	17.7832
1560	DAT	Female	NO	Kimbundu	Scondary education I cycle	NO	Yes, sometimes	NO	YES	NO	YES	YES	YES	YES	YES	NO	YES	YES	YES	YES	NO	117	85		77	35-44	19.7055
1561	DAT	Female	NO	Kimbundu	Illiterate	NO	No	NO	YES	NO	YES	YES	YES	YES	YES	YES	YES	YES	YES	YES	NO	154	96		84	45-54	20.5457
1562	DAT	Male	NO	Kimbundu	Primary education	NO	No	NO	NO	NO	YES	NO	NO	YES	NO	NO	NO	NO	NO	YES	YES	122	82		102	35-44	26.0262
1563	DAT	Male	NO	Kimbundu	Primary education	NO	No	YES	YES	NO	YES	NO	NO	YES	NO	NO	NO	NO	NO	YES	YES	168	101	131		45-54	34.2058
1564	DAT	Male	NO	Kimbundu	Scondary education I cycle	NO	No	YES	NO	NO	YES	NO	NO	NO	NO	NO	NO	NO	NO	NO	YES	178	110	127		55+	25.4581
1565	DAT	Female	NO	Kimbundu	Scondary education I cycle	NO	Yes, sometimes	NO	YES	YES	YES	YES	YES	YES	YES	YES	NO	NO	NO	NO	YES	139	90		89	25-34	34.6021
1566	DAT	Female	NO	Kimbundu	Scondary education I cycle	NO	No	YES	YES	NO	YES	NO	NO	YES	NO	NO	NO	NO	NO	YES	NO	111	71		83	15-24	21.9364
1567	DAT	Male	NO	Kimbundu	Primary education	NO	Yes, sometimes	NO	YES	NO	YES	NO	NO	YES	NO	NO	NO	NO	NO	YES	NO	138	94		96	55+	24.7409
1568	DAT	Female	NO	Kimbundu	Primary education	NO	Yes, sometimes	YES	NO	YES	NO	NO	YES	NO	NO	NO	NO	NO	NO	YES	NO	86	66		71	45-54	20.9366
1569	DAT	Female	NO	Other	Primary education	NO	No	NO	NO	NO	YES	NO	NO	YES	NO	NO	NO	NO	NO	NO	NO	111	66	104		45-54	30.4878
1570	DAT	Female	NO	Other	Illiterate	NO	No	NO	YES	YES	YES	YES	YES	YES	YES	YES	YES	YES	YES	YES	NO	130	86	104		25-34	22.4059
1571	DAT	Female	NO	Kimbundu	Illiterate	NO	No	NO	YES	NO	YES	NO	NO	YES	NO	NO	NO	NO	NO	YES	NO	138	90		78	35-44	34.6268
1572	DAT	Female	NO	Kimbundu	Scondary education I cycle	NO	Yes, sometimes	YES	YES	NO	YES	NO	NO	YES	NO	NO	NO	NO	NO	YES	YES	116	65	103		25-34	23.4236
1573	DAT	Female	NO	Kimbundu	Primary education	NO	No	YES	YES	NO	YES	NO	NO	YES	NO	NO	NO	NO	NO	NO	NO	159	86		105	45-54	23.1111
1574	DAT	Female	NO	Other	Secondary education II cycle	NO	No	NO	YES	NO	NO	NO	NO	YES	NO	NO	NO	NO	NO	YES	NO	106	69	78		25-34	17.4747
1575	DAT	Female	NO	Kimbundu	Primary education	NO	No	NO	YES	NO	YES	NO	NO	YES	NO	NO	NO	NO	NO	YES	YES	172	106		82	25-34	25.3333
1576	DAT	Male	NO	Bacongo	Primary education	YES	Yes, sometimes	YES	YES	NO	YES	YES	YES	YES	YES	YES	NO	NO	NO	YES	NO	107	69	102		55+	14.834
1577	DAT	Male	NO	Kimbundu	University	NO	Yes, sometimes	YES	YES	NO	YES	NO	NO	YES	NO	NO	NO	NO	NO	YES	NO				91	15-24	15.6226
1578	DAT	Male	NO	Kimbundu	Primary education	YES	Yes, sometimes	YES	NO	NO	YES	NO	NO	YES	NO	NO	NO	NO	NO	YES	NO	132	66	98		55+	33.9844
1579	DAT	Male	NO	Other	University	NO	No	YES	YES	NO	YES	YES	NO	YES	YES	YES	YES	YES	YES	YES	YES	106	72		85	25-34	19.5682
1580	DAT	Female	NO	Other	Illiterate	NO	Yes, sometimes	YES	YES	NO	YES	NO	NO	YES	NO	NO	NO	NO	NO	YES	YES	156	96	199		45-54	22.7732
1581	DAT	Female	NO	Kimbundu	Primary education	NO	Yes, sometimes	YES	NO	NO	YES	NO	NO	YES	NO	NO	NO	NO	NO	NO	YES	124	85		104	45-54	33.4252
1582	DAT	Female	NO	Kimbundu	Primary education	NO	No	NO	YES	NO	YES	YES	NO	YES	YES	YES	YES	YES	YES	YES	NO	126	89		147	25-34	24.3824
1583	DAT	Male	NO	Kimbundu		NO	No	NO	YES	NO	YES	NO	NO	NO	NO	NO	NO	NO	NO	NO	NO	122	78		84	15-24
1584	DAT	Female	NO	Kimbundu	Secondary education II cycle	NO	No	NO	YES	NO	YES	NO	NO	NO	YES	NO	YES	YES	YES	NO	NO	102	62		115	55+	24.7676
1585	DAT	Female	NO	Kimbundu	Scondary education I cycle	NO	No	NO	YES	NO	YES	NO	NO	NO	NO	NO	YES	YES	YES	YES	NO	123	83	85		25-34	19.1001
1586	DAT	Male	NO	Kimbundu		NO	No	YES	YES	NO	YES	NO	NO	NO	NO	NO	NO	NO	NO	NO	NO	143	103		84	45-54	35.1562
1587	HDP	Female	NO	Umbundo	Scondary education I cycle	NO	No	NO	YES	NO	YES	NO	NO	YES	YES	NO	NO	YES	YES	YES	NO	90	60	69		25-34	18.1955
1588	HDP	Female	NO	Bacongo	Primary education	NO	Yes, sometimes	NO	YES	NO	YES	NO	NO	YES	YES	NO	NO	YES	YES	YES	NO	106	66		86	35-44	15.6226
1589	HDP	Female	NO	Kimbundu	Illiterate	NO	No	YES	YES	NO	YES	YES	NO	YES	YES	NO	NO	YES	YES	YES	NO	126	76		102	25-34	15.4006
1590	HDP	Male	NO	Bacongo	Primary education	NO	Yes, sometimes	NO	YES	NO	YES	YES	NO	YES	YES	NO	NO	YES	YES	YES	NO	106	70		78	35-44	17.2635
1591	HDP	Female	NO	Bacongo	Primary education	NO	No	NO	YES	NO	YES	YES	NO	YES	YES	YES	NO	YES	YES	YES	NO	110	67		63	35-44	17.4449
1592	HDP	Female	NO	Kimbundu	University	NO	No	YES	YES	NO	NO	YES	NO	YES	YES	NO	NO	YES	YES	YES	NO	133	88	69		15-24	18.3655
1593	HDP	Male	NO	Kimbundu	Secondary education II cycle	NO	No	NO	YES	NO	NO	NO	NO	YES	YES	YES	YES	YES	YES	NO	NO	90	52	91		15-24	19.1327
1594	HDP	Male	NO	Kimbundu	Secondary education II cycle	NO	Yes, sometimes	NO	YES	NO	NO	NO	NO	YES	NO	NO	YES	NO	NO	NO	NO	120	81	61		25-34	15.7038
1595	HDP	Female	NO	Umbundo	Illiterate	NO	No	YES	YES	NO	YES	YES	NO	YES	YES	NO	NO	YES	YES	YES	NO	110	80		62	25-34	15.6225
1596	HDP	Female	NO	Kimbundu	Scondary education I cycle	NO	No	NO	YES	NO	YES	YES	NO	YES	YES	NO	NO	YES	YES	YES	NO	90	55	108		15-24	17.9931
1597	HDP	Female	NO	Kimbundu	Secondary education II cycle	NO	No	NO	YES	NO	YES	YES	NO	YES	YES	NO	NO	YES	YES	YES	NO	102	63		87	15-24	19.5717
1598	HDP	Male	NO	Bacongo	Secondary education II cycle	NO	No	NO	YES	NO	YES	YES	NO	YES	YES	NO	NO	YES	YES	YES	NO	117	81	135		15-24	17.2081
1599	HDP	Male	NO	Kimbundu	Primary education	NO	Yes, sometimes	NO	YES	NO	YES	YES	NO	YES	YES	NO	NO	YES	YES	YES	NO	150	78		92	55+	19.8347
1600	HDP	Female	NO	Bacongo	Scondary education I cycle	NO	No	YES	YES	NO	YES	YES	NO	YES	YES	NO	NO	YES	YES	YES	NO	78	53	74		15-24	19.5006
1601	HDP	Male	NO	Kimbundu	Secondary education II cycle	NO	No	NO	YES	NO	YES	YES	NO	YES	YES	NO	YES	YES	YES	YES	NO	92	52		71	15-24	14.834
1602	Cacuaco	Male	NO	Kimbundu	Scondary education I cycle	nO	No	NO	YES	YES	NO	NO	YES	NO	NO	YES	NO	NO	NO	NO	NO	129	84		91	25-34	18.4672
1603	Cacuaco	Male	NO	Umbundo	Scondary education I cycle	NO	Yes, sometimes	NO	YES	YES	NO	NO	NO	YES	YES	YES	NO	NO	NO	NO	NO	82	58		86	45-54
1604	Cacuaco	Female	NO	Umbundo	Secondary education II cycle	NO	No	NO	YES	NO	YES	NO	NO	YES	YES	YES	NO	NO	NO	NO	NO	113	98		101	15-24	18.5529
1605	Cacuaco	Male	NO	Bacongo	Scondary education I cycle	NO	Yes, sometimes	NO	YES	NO	NO	NO	NO	YES	NO	YES	NO	NO	NO	NO	NO	138	77		93	15-24	17.7832
1606	Cacuaco	Female	NO		Secondary education II cycle	NO	No	NO	YES		NO	YES	NO	YES	YES	NO	NO	NO	NO	NO	NO	99	57		85	15-24	20.0796
1607	Cacuaco	Male	NO	Kimbundu	Scondary education I cycle	YES	Yes, sometimes	NO	YES	NO	NO	NO	YES	YES	YES	YES	NO	NO	NO	NO	NO	117	87		92	25-34	17.9982
1608	Cacuaco	Female	NO	Umbundo	Primary education	NO	No	NO	YES	NO	YES	NO	YES	YES	NO	YES	NO	NO	NO	NO	NO				72	15-24	11.9594
1609	Cacuaco	Male	NO	Kimbundu	Secondary education II cycle	YES	No	NO	YES	NO	YES	NO	NO	NO	NO	YES	NO	NO	NO	NO	NO	125	82		87	25-34	18.4672
1610	Cacuaco	Female	NO	Umbundo	Primary education	NO	No	NO	YES	NO	NO	NO	NO	YES	YES	YES	NO	NO	NO	NO	YES	133	75		82	15-24
1611	Cacuaco	Male	NO	Bacongo	Secondary education II cycle	NO	No	NO	YES	NO	NO	NO	NO	YES	YES	YES	NO	NO	NO	NO	NO	89	57		61	15-24	18.0785
1612	Cacuaco	Female	NO																			122	77		65	25-34	15.8187
1613	Cacuaco	Male	NO	Umbundo	Secondary education II cycle	NO	Yes, sometimes	NO	YES	NO	NO	NO	NO	YES	NO	NO	NO	NO	NO	NO	NO	131	72		70	15-24	18.1018
1614	Cacuaco	Male	NO	Bacongo	Secondary education II cycle	NO	Yes, sometimes	NO	YES	NO	YES	YES	NO	NO	NO	YES	NO	NO	NO	NO	NO	83	46		139	15-24	14.7054
1615	Cacuaco	Female	NO	Kimbundu	Scondary education I cycle	NO	No	NO	YES	NO	NO	NO	YES	YES	NO	NO	NO	NO	NO	NO	NO	110	57		110	15-24	14.7015
1616	Cacuaco	Male	YES	Umbundo	Secondary education II cycle	NO	Yes, everyday	NO	YES	NO	NO	NO	NO	YES	NO	NO	NO	NO	NO	NO	NO	99	65		281	35-44	18.4013
1617	Cacuaco	Male	NO	Other	Scondary education I cycle	NO	Yes, sometimes	NO	YES	NO	YES	YES	YES	YES	YES	YES	NO	NO	NO	YES	NO	120	75		101	45-54	17.7557
1618	Cacuaco	Female	NO	Kimbundu	Primary education		Yes, sometimes	NO	YES	NO	YES	YES	YES	YES	YES	YES	NO	NO	NO	NO	NO	110	70			25-34	16.3593
1619	Cacuaco	Male	NO	Umbundo	Primary education	YES	Yes, everyday	NO	YES	NO	NO	NO	NO	YES	NO	NO	NO	NO	NO	NO	NO	126	83			25-34	17.1563
1620	Cacuaco	Male	NO	Bacongo	Scondary education I cycle	YES	No	NO	YES	NO	NO	NO	YES	YES	YES	NO	NO	NO	NO	NO	NO	124	65		106	15-24	20.7157
1621	Cacuaco	Female	NO	Bacongo	Scondary education I cycle	NO	No	NO	YES	NO	YES	NO	YES	NO	YES	YES	NO	NO	NO	NO	NO	86	57		140	15-24	17.4818
1622	Cacuaco	Male	NO	Umbundo	Scondary education I cycle	YES	Yes, everyday	NO	YES	YES	NO	YES	NO	NO	YES	YES	NO	NO	NO	NO	NO	105	66		74	35-44	18.3019
1623	Cacuaco	Female	NO	Other	Scondary education I cycle	NO	Yes, sometimes	YES	YES	NO	NO	YES	NO	YES	NO	NO	NO	NO	NO	NO	NO	100	64		89	25-34	16.4444
1624	Cacuaco	Female	NO	Other	Primary education	NO	No	NO	YES	NO	YES	YES	YES	YES	NO	NO	NO	NO	NO	NO	NO	119	65		105	25-34	20.7613
1625	Cacuaco	Male	NO	Umbundo	Scondary education I cycle	NO	Yes, everyday	YES	YES	NO	YES	NO	NO	YES	YES	NO	NO	NO	NO	NO	NO	111	67		78	35-44	19.8838
1626	Cacuaco	Male	NO														NO	NO	NO	NO	YES	130	93		127	35-44	18.3391
1627	Cacuaco	Male	NO	Bacongo	Primary education			NO	YES	NO	NO	NO	NO	YES	NO	NO	NO	NO	NO	NO	NO	120	79		87	55+	21.4844
1628	Cacuaco	Female	NO	Kimbundu	Scondary education I cycle	NO	No	YES	YES	NO	NO	NO	YES	YES	YES	NO	NO	NO	NO	NO	NO	111	71		86	15-24
1630	Cacuaco	Female	NO	Bacongo	Primary education	NO	No	NO	YES	NO	NO	NO	NO	YES	NO	YES	NO	NO	NO	NO	NO	101	67		81	15-24	17.8465
1631	Cacuaco	Female	NO	Umbundo	Primary education	NO	No	NO	YES	NO	NO	NO	NO	YES	NO	YES	NO	NO	NO	NO	NO	125	79		88	35-44	19.3625
1632	Cacuaco	Male	NO	Kimbundu	Scondary education I cycle	YES	Yes, sometimes	NO	YES	NO	YES	NO	YES	YES	YES	YES	NO	NO	NO	NO	NO	105	64		95	25-34	17.0433
1633	Cacuaco	Female	NO	Umbundo	Primary education	NO	No	NO	YES	NO	NO	NO	NO	YES	NO	YES	NO	NO	NO	NO	NO	105	73		89	15-24	14.2741
1634	Cacuaco	Male	NO	Kimbundu	Scondary education I cycle	YES	Yes, sometimes	NO	YES	NO	NO	NO	YES	YES	YES	NO	NO	NO	NO	NO	NO	134	85		85	25-34	18.4672
1635	Cacuaco	Male	NO	Umbundo	Scondary education I cycle	NO	Yes, sometimes	NO	YES	NO	NO	NO	NO	NO	YES	YES	NO	NO	NO	NO	NO	136	94		102	35-44	28.4011
1636	Cacuaco	Male	NO	Umbundo	Primary education	YES	Yes, everyday	NO	YES	NO	YES	NO	YES	YES	NO	YES	NO	NO	NO	NO	NO	110	79		81	35-44	18.1955
1637	Cacuaco	Female	NO	Umbundo	Secondary education II cycle	NO	Yes, sometimes	NO	YES	NO	NO	NO	YES	NO	NO	YES	NO	NO	NO	NO	NO	117	89		78	25-34	23.1247
1638	Cacuaco	Male	NO	Bacongo	Primary education	YES	Yes, sometimes	NO	YES	NO	YES	YES	NO	YES	YES	NO	NO	NO	NO	NO	NO	116	66		90	25-34	18.8324
1639	DAT	Male	NO	Kimbundu	Primary education	YES	Yes, sometimes	YES	YES	NO	YES	NO	NO	YES	NO	NO	NO	NO	NO	YES	NO	104	64		335	45-54	19.4674
1640	DAT	Female	NO	Other	Illiterate	YES	Yes, sometimes	NO	NO	NO	YES	NO	NO	YES	NO	NO	NO	NO	NO	YES	NO	177	95		86	55+
1641	DAT	Female	NO	Kimbundu	University	NO	No	NO	NO	NO	YES	NO	NO	YES	NO	NO	NO	NO	NO	NO	NO	125	75		91	25-34	33.4252
1642	DAT	Female	NO	Kimbundu		YES	Yes, sometimes	YES	NO	NO	YES	NO	NO	YES	NO	NO	NO	NO	NO	YES	NO	190	112		93	55+	24.6097
1643	DAT	Female	NO	Kimbundu	University	NO	Yes, sometimes	YES	NO	NO	YES	NO	NO	YES	NO	NO	NO	NO	NO	YES	NO	112	65		115	25-34	32.4661
1644	DAT	Female	NO	Kimbundu	Illiterate	NO	No	YES	YES	NO	YES	NO	NO	YES	NO	NO	NO	NO	NO	YES	NO	150	90		121	55+	33.834
1645	DAT	Male	NO	Bacongo	University	NO	No	YES	YES	NO	YES	NO	NO	YES	NO	NO	NO	NO	NO	YES	NO	121	75		94	25-34	24.5779
1646	DAT	Female	NO	Kimbundu	Scondary education I cycle	NO	No	NO	YES	NO	YES	NO	NO	YES	NO	NO	NO	NO	NO	YES	NO	192	115		94	45-54	24.677
1647	DAT	Female	NO	Kimbundu	Primary education	NO	Yes, sometimes	NO	YES	NO	YES	NO	NO	YES	NO	NO	NO	NO	NO	YES	NO	114	86		101	45-54	26.4024
1648	DAT	Female																								25-34
1649	DAT	Female	NO	Kimbundu	Illiterate	NO	Yes, sometimes	NO	NO	NO	NO	NO	NO	YES	NO	NO	NO	NO	NO	YES	NO	169	91		94	35-44	34.4132
1650	DAT	Female	NO	Other	Primary education	NO	Yes, sometimes	NO	YES	NO	NO	NO	NO	YES	NO	NO	NO	NO	NO	NO	YES	165	90		71	35-44	20
1651	DAT	Female	NO	Kimbundu	Illiterate	NO	Yes, sometimes	NO	NO	NO	NO	NO	NO	YES	NO	NO	NO	NO	NO	NO	NO	168	98		94	55+	27.1416
1652	DAT	Female	NO	Kimbundu	Illiterate	NO	No	NO	NO	NO	YES	NO	NO	YES	NO	NO	NO	NO	NO	YES	NO	194	121		85	45-54	40.4444
1653	DAT	Female	NO	Kimbundu	Scondary education I cycle	NO	Yes, sometimes	NO	YES	NO	YES	NO	NO	NO	NO	NO	NO	NO	NO	NO	YES	152	101		90	45-54	24.2424
1654	DAT	Female	NO	Kimbundu	Secondary education II cycle	NO	Yes, sometimes	NO	YES	YES	YES	YES	YES	YES	NO	YES	YES	YES	YES	YES	YES	178	103		86	35-44	22.6167
1655	DAT	Male	NO	Other	Secondary education II cycle	NO	No	NO	YES	NO	YES	NO	NO	YES	NO	NO	NO	NO	NO	YES	NO	151	90		131	35-44	30.8248
1656	DAT	Male	NO	Kimbundu	Scondary education I cycle	NO	No	YES	NO	NO	NO	NO	NO	YES	NO	NO	NO	NO	NO	YES	YES	100	74	105		55+	24.7409
1657	DAT	Female	NO	Bacongo	Scondary education I cycle	NO	Yes, sometimes	NO	YES	NO	YES	NO	NO	NO	NO	NO	NO	NO	NO	NO	YES	120	83	80		35-44	28.1943
1658	DAT	Female	NO	Kimbundu	University	NO	No	YES	NO	NO	YES	NO	NO	YES	NO	NO	NO	NO	NO	NO	NO	87	53	100		25-34	14.6924
1659	DAT	Male	NO	Kimbundu		NO	No	NO	YES	NO	YES	NO	NO	NO	NO	NO	NO	NO	NO	NO	NO	113	62		77	15-24	19.487
1660	DAT	Female	NO	Kimbundu	Secondary education II cycle	NO	No	NO	YES	NO	YES	NO	NO	NO	NO	NO	NO	NO	NO	NO	NO	111	85	103		35-44	27.0538
1661	DAT	Male	NO	Kimbundu	Secondary education II cycle	NO	No	NO	YES	NO	YES	NO	NO	NO	NO	NO	NO	NO	NO	NO	NO	113	69		80	25-34	16.456
1662	DAT	Female	NO	Umbundo		NO	No	NO	YES	NO	YES	NO	NO	NO	NO	NO	NO	NO	NO	NO	NO	127	87	111		15-24	21.8871
1663	DAT	Male	NO	Kimbundu	Secondary education II cycle	NO	No	NO	YES	NO	YES	NO	NO	NO	NO	NO	NO	NO	NO	NO	NO	111	65	95		15-24	18.9069
1664	DAT	Male	NO	Kimbundu		NO	No	NO	YES	NO	YES	NO	NO	NO	NO	NO	NO	NO	NO	NO	NO		109	91		15-24	18.8271
1665	DAT	Female	NO	Kimbundu	Secondary education II cycle	NO	Yes, sometimes	NO	YES	NO	YES	NO	NO	NO	NO	NO	NO	NO	NO	NO	NO	118	79		80	15-24	22.0603
1666	DAT	Female	NO	Kimbundu	Illiterate	NO	No	NO	YES	NO	YES	YES	YES	YES	YES	YES	YES	YES	YES	YES	NO	214	104		94	55+	11.9442
1667	DAT	Female	NO	Kimbundu	Secondary education II cycle	NO	No	NO	YES	NO	YES	NO	NO	NO	NO	NO	NO	NO	NO	NO	NO	154	93		108	25-34	25.5588
1668	DAT	Male	NO	Kimbundu	Secondary education II cycle	NO	Yes, sometimes	NO	YES	NO	YES	NO	NO	NO	NO	NO	NO	NO	NO	NO	NO	143	100		104	25-34	27.0538
1669	DAT	Female	NO	Kimbundu	Secondary education II cycle			NO	YES	NO	YES	NO	NO	NO	NO	NO	NO	NO	NO	NO	NO	87	55		79	15-24	20.1745
1670	DAT	Female	NO	Kimbundu	Primary education	NO	No	NO	YES	NO	NO	NO	NO	YES	NO	NO		NO	NO	NO	NO	112	76		88	55+	33.0491
1671	HDP	Male	NO	Umbundo	Primary education	NO	No	YES	YES	NO	YES	YES	NO	YES	YES	NO	NO	YES	YES	YES	NO	110	66	117		15-24	16.1778
1672	HDP	Male	NO	Umbundo	Scondary education I cycle	NO	No	NO	YES	NO	YES	NO	NO	YES	YES	NO	NO	YES	YES	YES	NO	99	58		89	15-24	16.901
1673	HDP	Male	NO	Kimbundu	Scondary education I cycle	NO	No	NO	YES	NO	YES	YES	NO	YES	YES	NO	YES	NO	YES	YES	NO	97	67		83	15-24	16.6531
1674	HDP	Male	NO	Kimbundu	Scondary education I cycle	NO	Yes, sometimes	NO	YES	NO	YES	YES	NO	YES	YES	NO	NO	YES	YES	YES	NO	102	75		86	25-34	17.3134
1675	HDP	Male	NO	Bacongo	Scondary education I cycle	NO	No	NO	YES	NO	NO	NO	NO	YES	NO	NO	YES	NO	YES	NO	NO	147	85	114		45-54	21.7192
1676	HDP	Male	NO	Bacongo	Secondary education II cycle	NO	No	NO	YES	NO	NO	NO	NO	YES	YES	YES	NO	NO	NO	NO	NO	129	68	97		15-24	19.047
1677	HDP	Female	NO	Kimbundu	Secondary education II cycle	NO	No	YES	YES	NO	YES	YES	NO	YES	NO	NO	NO	NO	YES	YES	YES	122	80	102		15-24	14.881
1678	HDP	Female	NO	Umbundo	Secondary education II cycle	NO	No	NO	YES	NO	NO	YES	NO	YES	NO	NO	NO	YES	YES	YES	NO	91	59		76	25-34	19.1406
1679	HDP	Male	NO	Kimbundu	Primary education	NO	No	NO	YES	NO	YES	YES	NO	YES	NO	NO	NO	YES	YES	YES	NO	103	73	160		35-44
1680	HDP	Female	NO	Other	Primary education	YES	Yes, sometimes	YES	YES	NO	YES	YES	NO	YES	YES	NO	YES	YES	YES	YES	NO	98	54	106		25-34	17.0656
1681	HDP	Male	NO	Kimbundu	Primary education	NO	Yes, sometimes	NO	YES	NO	YES	YES	NO	YES	YES	NO	YES	YES	YES	YES	NO	104	78		93	25-34	15.9875
1682	HDP	Male	NO	Kimbundu	Primary education	NO	Yes, sometimes	NO	YES	NO	YES	YES	NO	YES	YES	NO	NO	YES	YES	YES	NO	150	78		92	55+	19.8347
1683	HDP	Male	NO	Bacongo	Primary education	YES	Yes, sometimes	NO	YES	NO	YES	YES	NO	YES	YES	NO	NO	YES	YES	YES	NO	115	71	122		35-44	18.591
1684	HDP	Male	NO	Kimbundu	Primary education	NO	Yes, sometimes	NO	YES	YES	YES	YES	NO	YES	YES	NO	NO	YES	YES	YES	NO	137	94	88		25-34	16.901
1685	HDP	Female	NO	Kimbundu	Scondary education I cycle	NO	No	YES	YES	NO	YES	YES	NO	YES	NO	NO	NO	YES	YES	YES	NO	100	67	116		25-34	20.0796
1686	DAT	Male	NO	Umbundo	Scondary education I cycle	NO	No	NO	NO	NO	YES	NO	NO	YES	NO	NO	NO	NO	NO	YES	NO	158	81		113	35-44	28.7347
1687	DAT	Female	NO	Kimbundu	Secondary education II cycle	NO	No	NO	NO	NO	YES	NO	NO	YES	NO	NO	NO	NO	NO	NO	NO	92	81		90	25-34	18.0662
1688	DAT	Male	NO	Kimbundu	Scondary education I cycle	NO	Yes, sometimes	NO	YES	NO	YES	NO	NO	YES	NO	NO	NO	NO	NO	NO	NO	165	105		94	55+	24.4418
1689	DAT	Female	NO	Kimbundu	Secondary education II cycle	NO	Yes, sometimes	NO	YES	NO	YES	NO	NO	YES	NO	NO	NO	NO	NO	YES	NO	137	86		121	15-24	25.3443
1690	DAT	Female	NO	Kimbundu	Illiterate	NO	Yes, sometimes	YES	YES	NO	NO	NO	NO	YES	NO	NO	NO	NO	NO	NO	NO	129	55		92	55+	18.75
1691	DAT	Female	NO	Kimbundu	Secondary education II cycle	NO	No	YES	YES	NO	YES	NO	NO	YES	NO	NO	NO	NO	NO	YES	NO	100	74	67		15-24	25.5102
1692	DAT	Female	NO	Kimbundu	Illiterate	NO	Yes, sometimes	YES	YES	NO	YES	NO	NO	YES	NO	NO	NO	NO	NO	YES	NO	210	100		92	55+	21.6713
1693	DAT	Female	NO	Kimbundu	Primary education	NO	Yes, sometimes	NO	YES	NO	YES	NO	NO	YES	NO	NO	NO	NO	NO	YES	NO	175	106		91	45-54	26.079
1694	DAT	Male	NO	Other	Scondary education I cycle	NO	Yes, sometimes	NO	NO	NO	NO	NO	NO	YES	NO	NO	NO	NO	NO	NO	NO	122	76		85	35-44	27.1809
1695	DAT	Female	NO	Kimbundu	Primary education	NO	No	NO	YES	NO	YES	NO	NO	NO	NO	NO	NO	NO	NO	NO	YES	117	72	85		35-44	22.2222
1696	DAT	Male	NO	Kimbundu	Primary education	NO	No	YES	NO	NO	NO	NO	NO	NO	NO	NO	NO	NO	NO	NO	NO	206	130	97		55+	29.0318
1697	Cariango	Female	NO	Kimbundu	Primary education	NO	Yes, sometimes	NO	NO	NO	YES	YES	NO	YES	NO	YES	NO	YES	NO	YES	YES	131	82		95	45-54	24.2439
1698	Cariango	Male	NO	Kimbundu	Scondary education I cycle	YES	Yes, sometimes	NO	YES	NO	YES	YES	YES	YES	YES	NO	NO	YES	NO	YES	NO	111	78		82	25-34	19.9594
1699	Cariango	Female	NO	Kimbundu	Primary education	YES	Yes, sometimes	NO	YES	NO	YES	YES	YES	YES	YES	YES	NO	YES	NO	YES	YES	156	84		87	55+	17.7778
1700	Cariango	Female	NO	Kimbundu	Scondary education I cycle	NO	No	NO	YES	NO	YES	YES	NO	YES	NO	YES	YES	NO	YES	YES	NO	92	63		80	25-34	17.1875
1701	Cariango	Female	NO	Kimbundu	Primary education	NO	No	YES	YES	YES	YES	YES	YES	YES	YES	YES	YES	NO	NO	YES	NO	101	70		80	35-44	15.0551
1702	Cariango	Male	NO	Umbundo	Primary education	NO	No	NO	YES	NO	NO	YES	YES	YES	YES	YES	NO	NO	YES	YES	NO	123	87		112	45-54	22.7583
1703	Cariango	Male	NO	Kimbundu	Primary education	YES	Yes, sometimes	NO	YES	NO	YES	YES	YES	YES	NO	YES	YES	YES	YES	YES	NO	143	95		93	45-54	17.2248
1704	Cariango	Male	NO	Kimbundu	Secondary education II cycle	NO	Yes, sometimes	NO	YES	YES	NO	NO	NO	YES	NO	NO	YES	YES	NO	NO	YES	134	109		122	15-24	22.3094
1705	Cariango	Female	NO		Secondary education II cycle	NO	No	NO	YES	YES	YES	YES	YES	YES	NO	YES	NO	NO	YES	YES	YES	120	78		92	25-34	22.6003
1706	Cariango	Male	NO	Bacongo	University	NO	No	YES	YES	NO	YES	YES	YES	YES	YES	YES	NO	NO	YES	YES	NO	87	62		92	25-34	18.7783
1707	Cariango	Male	NO	Kimbundu	Primary education	YES	No	NO	YES	NO	YES	YES	YES	YES	YES	YES	YES	YES	YES	YES	YES	139	83	103		55+	25.1532
1708	Cariango	Female	NO	Bacongo	Scondary education I cycle	NO	No	NO	YES	NO	YES	YES	YES	YES	NO	YES	NO	YES	NO	YES	NO	105	64		81	15-24	18.4265
1709	Cariango	Male	NO	Kimbundu	Scondary education I cycle	YES	Yes, sometimes	NO	YES	NO	YES	NO	YES	YES	NO	YES	YES	YES	YES	NO	NO	119	85	111		15-24	17.2111
1710	Cariango	Male	NO	Kimbundu	Secondary education II cycle	NO	Yes, sometimes	NO	YES	NO	YES	YES	NO	YES	YES	YES	YES	YES	NO	YES	NO	134	88		66	15-24	19.8352
1711	Cariango	Female	NO	Kimbundu	Primary education	NO	No	NO	YES	NO	YES	YES	NO	YES	NO	YES	YES	NO	YES	YES	YES	170	85		97	55+	18.9619
1712	Cariango	Male	NO	Kimbundu	Primary education	NO	No	NO	YES	NO	NO	NO	YES	YES	NO	NO	NO	YES	YES	NO	NO	132	102		80	15-24	17.1468
1713	Cariango	Female	NO	Kimbundu	Illiterate	NO	No	YES	YES	NO	YES	YES	YES	YES	YES	YES	YES	YES	YES	YES	YES	204	112		106	45-54	28.617
1714	Cariango	Female	NO	Kimbundu	Primary education	NO	No	YES	YES	YES	YES	YES	YES	YES	YES	YES	NO	NO	NO	YES	NO	115	78		92	55+	15.8169
1715	Cariango	Male	NO	Kimbundu	Scondary education I cycle	NO	Yes, sometimes	NO	YES	NO	YES	YES	YES	YES	YES	NO	NO	NO	NO	NO	NO	115	93		112	25-34	17.3061
1716	Cariango	Male	NO	Kimbundu	Secondary education II cycle	NO	No	YES	YES	NO	NO	YES	NO	YES	YES	YES	YES	NO	YES	YES	NO	109	77		101	15-24	19.79
1717	Cariango	Male	NO	Kimbundu	Scondary education I cycle	NO	Yes, sometimes	NO	YES	NO	YES	YES	YES	YES	YES	YES	NO	NO	YES	NO	NO	100	75		99	35-44	17.7557
1718	Cariango	Female	NO	Kimbundu	Illiterate	NO	No	NO	YES	YES	YES	YES	YES	YES	YES	YES	NO	YES	NO	YES	NO	121	79		90	25-34	21.5019
1719	Cariango	Female	NO	Kimbundu	Illiterate	NO	No	NO	YES	NO	YES	YES	YES	YES	YES	YES	YES	NO	YES	YES	NO	102	77		88	55+	21.9261
1720	Cariango	Female	NO	Kimbundu	Illiterate	NO	Yes, sometimes	NO	YES	NO	NO	YES	YES	YES	YES	NO	YES	YES	YES	YES	YES	152	102		136	45-54
1721	Cariango	Female	NO	Kimbundu	Illiterate	YES	No	NO	YES	NO	YES	YES	NO	YES	YES	YES	NO	NO	NO	YES	YES	142	100	65		25-34	21.2084
1722	Cariango	Male	NO	Kimbundu	Scondary education I cycle	NO	No	NO	YES	NO	YES	NO	NO	YES	NO	YES	NO	NO	NO	NO	NO	123	59		74	35-44	20.6852
1723	Cariango	Male	NO	Kimbundu	Scondary education I cycle	YES	Yes, sometimes	NO	YES	YES	NO	YES	NO	YES	NO	NO	NO	NO	NO	YES	NO	110	71		86	25-34	17.8748
1724	Cariango	Female	NO	Kimbundu	Primary education	NO	No	NO	YES	NO	YES	NO	YES	YES	YES	NO	YES	NO	NO	YES	NO	123	80		98	25-34	20.061
1725	Cariango	Male	NO	Kimbundu	Scondary education I cycle	NO	No	YES	YES	YES	YES	YES	YES	YES	NO	NO	YES	YES	NO	NO	YES	112	88		91	45-54	19.1516
1726	Cariango	Female	NO	Kimbundu	Secondary education II cycle	NO	No	NO	YES	NO	YES	YES	NO	YES	YES	YES	NO	NO	NO	YES	NO	99	68		84	15-24	20.83
1727	Cariango	Male	NO	Kimbundu	Illiterate	YES	No	NO	NO	NO	NO	NO	NO	YES	NO	NO	NO	YES	YES	NO	NO	119	69		104	25-34	19.5965
1728	Cariango	Female	NO	Kimbundu	Secondary education II cycle		No	NO	NO	YES	NO	YES	YES	YES	YES	NO	YES	NO	NO	NO	NO	92	52		118	15-24	16.7969
1729	Cariango	Male	NO	Kimbundu	Primary education	YES	Yes, sometimes	NO	YES	NO	NO	YES	YES	YES	YES	YES	YES	YES	YES	YES	NO	95	61		68	35-44
1730	Cariango	Male	NO	Bacongo	Secondary education II cycle	YES	No	NO	NO	NO	YES	NO	NO	YES	NO	YES	NO	NO	NO	NO	NO	118	69	95		15-24	18.8271
1731	Cariango	Female	NO	Kimbundu	Illiterate	NO	Yes, sometimes	NO	YES	NO	YES	NO	YES	YES	NO	NO	NO	NO	YES	NO	NO	132	78		83	55+	21.6041
1732	Cariango	Female	NO	Bacongo	Illiterate	NO	No	NO	YES	NO	YES	YES	YES	YES	YES	YES	YES	YES	YES	YES	YES	92	54		56	25-34	15.4006
1733	Cariango	Female	NO	Umbundo	Secondary education II cycle	NO	No	YES	YES	NO	NO	YES	YES	YES	NO	YES	YES	YES	NO	YES	NO	107	57	112		25-34	19.7055
1734	Cariango	Male	NO	Kimbundu	Secondary education II cycle	NO	No	NO	YES	YES	NO	YES	NO	YES	NO	YES	NO	NO	NO	NO	NO	141	89		148	25-34	24.3824
1735	Cariango	Male	NO	Kimbundu	Scondary education I cycle	NO	Yes, sometimes	NO	YES	NO	YES	YES	YES	YES	YES	YES	YES	YES	YES	YES	YES	110	70	79		25-34	17.704
1736	Cariango	Female	NO	Kimbundu	Illiterate	YES	Yes, sometimes	YES	YES	YES	YES	YES	YES	YES	YES	YES	NO	YES	YES	YES	NO	122	81		61	25-34	20.9566
1737	Cariango	Female	NO	Kimbundu	Illiterate	NO	No	YES	YES	NO	NO	YES	YES	YES	YES	YES	YES	NO	NO	YES	NO	185	104		99	55+	22.6409
1738	Cariango	Female	NO	Kimbundu	Secondary education II cycle	NO	Yes, sometimes	NO	YES	NO	NO	NO	YES	YES	YES	YES	NO	NO	YES	YES	YES	115	62		93	15-24	20.7008
1739	Cariango	Female	NO	Kimbundu	Scondary education I cycle	NO	Yes, sometimes	NO	YES	NO	NO	NO	YES	YES	YES	YES	YES	NO	YES	YES	NO	111	69	113		35-44	33.4622
1740	Cariango	Male	NO	Kimbundu	Illiterate	YES	No	NO	YES	NO	YES	YES	NO	YES	YES	NO	YES	NO	YES	YES	NO	99	67		95	35-44	15.3697
1741	Cariango	Female	NO	Kimbundu	Primary education	YES	No	NO	YES	NO	NO	YES	YES	YES	YES	YES	NO	NO	NO	YES	NO	106	67		72	55+	23.8054
1742	Cariango	Female	NO	Kimbundu	Primary education	NO	No	NO	YES	NO	YES	YES	YES	YES	YES	YES	YES	YES	YES	YES	YES	142	84		146	45-54	17.313
1743	Cariango	Female	NO		Scondary education I cycle	NO	Yes, sometimes	NO	YES	YES	YES	YES	NO	YES	NO	YES	YES	NO	YES	YES	NO	119	76		73	15-24	18.6115
1744	Cariango	Male	NO	Other	Primary education	YES	Yes, sometimes	NO	YES	NO	YES	YES	YES	YES	NO	YES	YES	NO	YES	YES	YES	94	69		78	35-44	17.5064
1745	Cariango	Female	NO	Kimbundu	Primary education	NO	No	YES	YES	YES	YES	YES	YES	YES	YES	YES	NO	NO	YES	YES	YES	133	89		196	55+	26.6389
1746	Cariango	Female	NO	Kimbundu	Scondary education I cycle	NO	No	NO	YES	NO	NO	YES	YES	YES	NO	NO	NO	NO	NO	YES	NO	121	83		75	25-34	21.0772
1747	Cariango	Female	NO	Kimbundu	Primary education	NO	Yes, sometimes	NO	YES	NO	YES	YES	YES	YES	NO	YES	YES	NO	NO	YES	NO	99	70		88	35-44	18.369
1748	Cariango	Female	NO	Kimbundu	Primary education	NO	No	NO	YES	NO	YES	NO	YES	YES	NO	YES	YES	NO	YES	YES	YES	187	136		127	45-54	36.5922
1749	Cariango	Male	NO	Kimbundu	Scondary education I cycle	NO	No	NO	YES	NO	NO	NO	NO	YES	NO	NO	YES	NO	YES	YES	NO				72	15-24	15.0311
1750	Cariango	Female	NO	Kimbundu	Illiterate	NO	No	YES	YES	YES	YES	YES	YES	YES	YES	NO	YES	NO	NO	YES	YES	127	79		84	55+	30.0621
1751	Cariango	Female	NO	Other	Secondary education II cycle	NO	Yes, sometimes	NO	YES	NO	NO	NO	NO	YES	NO	YES	YES	NO	YES	NO	NO	133	76		70	15-24	18.194
1752	Cariango	Male	NO	Kimbundu	Illiterate	NO	Yes, sometimes	NO	YES	NO	YES	YES	YES	YES	YES	YES	NO	NO	NO	YES	NO	92	55		78	45-54	18.2066
1753	Cariango	Female	NO	Kimbundu	Illiterate	NO	No	NO	YES	YES	YES	NO	NO	YES	NO	YES	YES	NO	YES	YES	YES	156	93		111	55+	30.8012
1754	Cariango	Male	NO	Kimbundu	Scondary education I cycle	YES	No	NO	YES	NO	YES	YES	NO	YES	YES	YES	YES	YES	YES	YES	NO	136	91		139	35-44
1755	Cariango	Male	NO	Bacongo	Secondary education II cycle	NO	No	NO	YES	NO	YES	NO	NO	YES	NO	YES	YES	YES	NO	NO	NO	177	71		75	15-24
1756	Cariango	Male	NO	Kimbundu	Scondary education I cycle	NO	No	NO	NO	NO	YES	NO	NO	YES	NO	YES	YES	YES	NO	NO	NO	121	81		80	15-24	20.5693
1757	Cariango	Male	NO	Kimbundu	Secondary education II cycle	NO	No	NO	YES	NO	YES	NO	NO	YES	YES	NO	NO	NO	YES	YES	NO	119	77		80	15-24
1758	Cariango	Female	NO	Kimbundu	Scondary education I cycle	NO	Yes, sometimes	YES	NO	NO	YES	NO	NO	YES	NO	YES	NO	NO	NO	NO	NO	130	94		96	25-34	17.1563
1759	Cariango	Male	NO	Kimbundu	Secondary education II cycle	NO	No	NO	YES	NO	NO	YES	NO	YES	NO	YES	NO	NO	YES	NO	NO	116	82	104		15-24	20.7476
1760	Cariango	Male	NO	Kimbundu	Scondary education I cycle	NO	No	NO	YES	NO	YES	YES	YES	YES	NO	NO	NO	NO	NO	NO	NO	91	67	127		25-34	18.7783
1761	Cariango	Male	NO	Kimbundu	Secondary education II cycle	NO	Yes, sometimes	YES	YES	YES	YES	YES	NO	YES	NO	NO	NO	NO	NO	NO	NO	114	71	102		25-34	20.7476
1762	Cariango	Male	NO	Kimbundu	Scondary education I cycle	YES	Yes, sometimes	NO	NO	NO	NO	NO	NO	YES	NO	YES	YES	NO	YES	NO	NO	114	94	97		15-24	22.7903
1763	Cariango	Male	NO	Kimbundu	Scondary education I cycle	NO	No	NO	YES	NO	NO	YES	YES	YES	YES	YES	YES	NO	NO	NO	NO	106	69		74	25-34	20.7157
1764	Cariango	Male	NO	Kimbundu	Secondary education II cycle	NO	No	NO	YES	NO	YES	YES	NO	YES	NO	YES	YES	NO	YES	YES	NO	97	62		63	25-34	20.3125
1765	Cariango	Male	NO	Kimbundu	Secondary education II cycle	NO	No	YES	YES	NO	YES	YES	YES	YES	NO	YES	YES	YES	YES	YES	NO	88	72		79	25-34	20.9876
1766	Cariango	Male	NO	Kimbundu	Scondary education I cycle	NO	No	NO	NO	NO	NO	YES	NO	YES	YES	NO	NO	NO	NO	NO	NO	109	64		75	25-34	19.7777
1767	Cariango	Male	NO	Bacongo	Scondary education I cycle	NO	Yes, sometimes	NO	YES	YES	YES	YES	YES	YES	YES	YES	YES	NO	NO	YES	NO	99	71		89	45-54	17.1563
1768	Cariango	Female	NO	Kimbundu	Illiterate	YES	No	YES	NO	NO	YES	YES	YES	YES	YES	YES	YES	NO	YES	YES	YES	216	149		90	55+	20.5049
1769	Cariango	Male	NO	Bacongo	Secondary education II cycle	NO	Yes, sometimes	NO	NO	NO	NO	NO	NO	NO	NO	NO	YES	NO	NO	NO	NO	118	82		116	25-34	19.3625
1770	Cariango	Male	NO	Kimbundu	Primary education	NO	Yes, sometimes	YES	YES	YES	YES	YES	YES	YES	YES	YES	YES	NO	YES	YES	NO	112	74		76	35-44	18.9069
1771	Cariango	Female	NO	Kimbundu		NO	No	NO	NO	YES	NO	YES	YES	NO	YES	YES	YES	YES	YES	YES	NO	147	86		89	25-34
1772	Cariango	Male	NO	Kimbundu	Scondary education I cycle	NO	Yes, sometimes	NO	YES	YES	YES	YES	YES	YES	YES	YES	NO	NO	YES	YES	NO	111	69	82		15-24	18.4672
1773	Cariango	Female	NO	Umbundo	Scondary education I cycle	NO	No	NO	YES	NO	NO	YES	YES	NO	NO	YES	NO	NO	NO	NO	NO	136	112		65	25-34	17.6254
1774	Cariango	Female	NO	Kimbundu	Secondary education II cycle	NO	No	NO	NO	NO	NO	NO	NO	YES	NO	NO	NO	NO	NO	NO	NO	137	102		82	15-24	17.0392
1775	Cariango	Male	NO	Kimbundu	Scondary education I cycle	YES	Yes, sometimes	YES	NO	YES	YES	YES	YES	YES	NO	NO	YES	NO	YES	YES	NO	110	86		285	45-54	18.4265
1776	Cariango	Female	NO	Kimbundu	Scondary education I cycle	NO	No	NO	YES	NO	YES	NO	NO	YES	NO	YES	YES	YES	YES	YES	NO				57	25-34
1777	Cariango	Female	NO	Kimbundu	Primary education	NO	No	NO	YES	NO	NO	YES	NO	YES	NO	NO	YES	NO	NO	NO	NO	114	76	106		35-44	15.4056
1778	Cariango	Female	NO	Kimbundu	Scondary education I cycle	NO	No	YES	NO	NO	YES	NO	NO	YES	YES	NO	YES	YES	YES	YES	NO	109	69		76	15-24	19.8178
1779	Cariango	Female	NO	Kimbundu	Illiterate	NO	No	NO	YES	NO	NO	NO	NO	YES	NO	YES	NO	NO	YES	NO	NO	147	100		88	55+	33.7704
1780	Cariango	Male	NO	Bacongo	University				YES	NO	YES	YES	YES	YES	NO	YES	NO	NO	NO	YES	NO	107	74		90	25-34	29.9383
1781	Cariango	Male	NO	Kimbundu	Scondary education I cycle	NO	No	YES	YES	YES	YES	YES	NO	YES	NO	YES	YES	YES	NO	NO	NO	114	77		103	25-34	19.0039
1782	Cariango	Male	NO	Kimbundu	Scondary education I cycle	NO	Yes, sometimes	NO	YES	NO	YES	NO	NO	YES	NO	YES	YES	NO	NO	NO	NO	107	62		92	15-24	18.424
1783	Cariango	Male	NO	Kimbundu	Secondary education II cycle	YES	Yes, sometimes	NO	YES	NO	NO	NO	YES	YES	NO	YES	NO	NO	NO	NO	NO	123	84		91	25-34	21.8724
1784	Cariango	Male	NO	Kimbundu	Secondary education II cycle	NO	Yes, sometimes	YES	YES	YES	NO	YES	NO	YES	YES	NO	NO	YES	NO	NO	NO	116	87		97	25-34	19.5682
1785	Cariango	Female	NO	Kimbundu	Primary education	NO	No	NO	YES	NO	NO	NO	YES	YES	NO	YES	NO	NO	YES	NO	NO	134	78		73	25-34	19.6752
1786	Cariango	Female	NO	Kimbundu	Illiterate	NO	No	NO	YES	NO	YES	YES	YES	YES	NO	YES	YES	NO	NO	NO	NO	115	70		59	45-54	18.1312
1787	Cariango	Female	NO	Other	Scondary education I cycle	NO	Yes, sometimes	NO	NO	NO	YES	YES	YES	YES	NO	YES	NO	NO	NO	NO	NO	109	63		67	25-34	22.3757
1788	Cariango	Female	NO	Kimbundu	Primary education	NO	Yes, sometimes	NO	NO	NO	YES	YES	YES	YES	NO	YES	YES	NO	YES	NO	NO	128	84		78	45-54	37.3932
1789	Cariango	Female	NO	Kimbundu	Secondary education II cycle	NO	No	NO	YES	YES	YES	YES	NO	NO	NO	NO	NO	NO	YES	YES	NO	123	90		111	25-34	18.026
1790	Cariango	Female	NO	Kimbundu	Primary education	NO	No	NO	NO	NO	YES	YES	YES	YES	YES	YES	YES	NO	YES	YES	NO	93	76		99	25-34	24.8889
1791	Cariango	Male	NO	Kimbundu	Scondary education I cycle	NO	No	YES	NO	NO	YES	YES	NO	NO	NO	YES	NO	YES	YES	YES	NO	123	75		104	35-44	23.2254
1792	Cariango	Male	NO	Kimbundu	Scondary education I cycle	NO	Yes, sometimes	YES	YES	NO	YES	YES	YES	YES	YES	YES	YES	YES	YES	NO	NO	110	78		89	35-44	21.3839
1793	Cariango	Male	NO	Kimbundu	Scondary education I cycle	NO	Yes, sometimes	NO	YES	NO	YES	YES	YES	YES	NO	YES	NO	NO	YES	YES	YES	114	86		96	35-44
1794	Cariango	Female	NO	Kimbundu	Scondary education I cycle	NO	No	NO	NO	NO	NO	NO	YES	YES	NO	YES	NO	NO	NO	YES	NO	104	63		75	35-44	17.2248
1795	Cariango	Male	NO	Umbundo	Primary education	YES	No	NO	YES	NO	NO	YES	NO	YES	NO	YES	YES	NO	NO	NO	NO	109	75		93	25-34	18.9069
1796	Cariango	Male	NO	Kimbundu	Secondary education II cycle	NO	No	NO	NO	NO	NO	YES	NO	YES	NO	YES	NO	NO	NO	NO	NO	125	80		88	35-44	26.3958
1797	Cariango	Female	NO	Kimbundu	Secondary education II cycle	NO	No	NO	NO	NO	YES	YES	YES	NO	NO	YES	NO	YES	YES	YES		95	71		76	15-24
1798	Cariango	Male	NO	Kimbundu	Secondary education II cycle	NO	No	NO	NO	NO	NO	YES	YES	NO	NO	YES	NO	YES	YES	YES	NO	125	92		71	25-34	21.304
1799	Cariango	Male	NO	Kimbundu	Scondary education I cycle	NO	No	NO	YES	NO	YES	YES	NO	YES	YES	YES	NO	NO	YES	YES	NO	114	83		77	15-24	17.5064
1800	Cariango	Female	NO	Kimbundu	Primary education	NO	Yes, sometimes	NO	YES	NO	YES	NO	YES	YES	YES	YES	YES	NO	YES	YES	YES	188	139		109	45-54	14.3251
1801	Cariango	Female	NO	Other	University	NO	No	NO	YES	NO	NO	YES	YES	YES	NO	YES	NO	YES	YES	NO	NO	107	85	92		15-24	17.898
1802	Cariango	Female	NO	Kimbundu	Primary education	NO	No	NO	YES	NO	NO	YES	YES	YES	NO	YES	NO	YES	YES	YES	YES	156	97		100	25-34	31.5719
1803	Cariango	Female	NO	Kimbundu	Primary education	NO	Yes, sometimes	NO	YES	NO	YES	YES	YES	YES	YES	YES	YES	YES	YES	YES	YES	135	92		97	55+	19.8178
1804	Cariango	Male	NO	Kimbundu	Scondary education I cycle	NO	No	NO	YES	NO	NO	NO	NO	NO	NO	NO	NO	NO	NO	YES	NO	110	75		70	15-24	15.3894
1805	Cariango	Female	NO		Primary education		Yes, sometimes	NO	YES	NO	YES	NO	NO	NO	NO	NO	NO	NO	NO	YES	NO	115	86		74	25-34	16.9747
1806	Cariango	Female	NO		Secondary education II cycle	NO	No	NO	YES	NO	YES	NO	NO	NO	NO	NO	NO	NO	NO	NO	NO	109	79		76	15-24	18.2868
1807	Cariango	Male	NO		Scondary education I cycle	NO	Yes, sometimes	NO	NO	YES	YES	NO	YES	YES	NO	NO	NO	NO	NO	NO	NO	115	56		105	25-34	15.8541
1808	Cariango	Female	NO	Kimbundu	Secondary education II cycle	NO	No	NO	YES	NO	NO	NO	NO	NO	NO	NO	NO	NO	NO	NO	NO	98	56	98		15-24	18.4425
1809	Cariango	Female	NO	Kimbundu	Illiterate	NO	No	NO	NO	NO	NO	YES	NO	NO	NO	NO	NO	NO	NO	NO	NO	114	82		92	45-54	24.0344
1810	Cariango	Male	NO	Kimbundu	University	NO	No	NO	NO	NO	NO	NO	NO	NO	NO	NO	NO	NO	NO	NO	NO	120	77		86	25-34	19.9573
1811	Cariango	Female	NO	Bacongo	Illiterate	NO	No	NO	YES	NO	NO	NO	NO	NO	NO	NO	NO	NO	NO	NO	NO	111	75		62	35-44	18.3594
1812	Cariango	Male	NO	Umbundo	Secondary education II cycle	YES	Yes, sometimes	YES	NO	NO	NO	YES	NO	NO	NO	NO	NO	NO	NO	NO	NO	144	91		87	35-44	19.5682
1813	Cariango	Female	NO	Kimbundu	Primary education	NO	Yes, sometimes	NO	YES	NO	YES	YES	YES	YES	NO	YES	YES	YES	YES	YES	NO	132	102		103	35-44	26.9127
1814	Cariango	Female	NO	Kimbundu	Illiterate	NO	No	YES	NO	YES	YES	YES	NO	NO	NO	YES	NO	YES	YES	YES		148	99		229	35-44
1815	Cariango	Male	NO	Kimbundu	Secondary education II cycle	NO	No	NO	YES	NO	NO	YES	NO	YES	NO	YES	YES	YES	YES	NO	NO	95				15-24	16.5413
1816	Cariango	Female	NO	Kimbundu	Primary education	NO	No	NO	YES	NO	YES	YES	YES	YES	NO	YES	NO	NO	NO	YES	NO	134	88		85	55+	17.7154
4025	Cariango	Male	NO	Umbundo	Primary education	NO	No	NO	YES	NO	YES	YES	NO	YES	NO	NO	NO	YES	YES	NO	NO	131	91		83	35-44	20.8611
1818	Cariango	Female	NO	Kimbundu	Scondary education I cycle	NO	No	NO	NO	NO	YES	YES	YES	NO	YES	YES	YES	YES	NO	YES	YES	140	92		63	35-44	38.0196
1819	Cariango	Female	NO	Kimbundu	Scondary education I cycle	NO	No	NO	NO	NO	YES	YES	YES	YES	NO	YES	YES	YES	YES	YES	YES	121	131		88	55+	23.6013
1820	Cariango	Female	NO	Kimbundu	Illiterate	NO	Yes, sometimes	NO	YES	NO	YES	YES	YES	YES	NO	YES	YES	YES	NO	YES	NO	146	78		77	55+	18.8455
1821	Cariango	Male	NO	Other	Primary education	YES	No	NO	YES	NO	YES	YES	NO	YES	NO	YES	YES	NO	NO	YES	NO	109	72		296	55+	15.7038
1822	Cariango	Male	NO	Kimbundu	Primary education	YES	Yes, sometimes	NO	YES	NO	YES	YES	YES	YES	YES	YES	YES	YES	YES	YES	NO	125	84		100	55+	19.8141
1823	Cariango	Female	NO	Bacongo	Scondary education I cycle	NO	No	NO	YES	YES	YES	YES	NO	NO	NO	YES	NO	YES	YES	YES	NO	112	75	98		25-34	19.5556
1824	Cariango	Male	NO	Kimbundu	Secondary education II cycle	NO	No	NO	YES	NO	YES	NO	NO	YES	NO	NO	NO	NO	NO	NO	NO	137	101		71	15-24	19.3337
1825	Cariango	Male	NO	Umbundo	Scondary education I cycle	NO	Yes, sometimes	NO	YES	NO	YES	YES	NO	YES	YES	YES	YES	NO	YES	YES	NO	108	72		51	35-44	16.8061
1826	Cariango	Male	NO	Kimbundu	Primary education	NO	No	NO	YES	NO	YES	YES	YES	YES	YES	YES	NO	YES	YES	YES	NO	105	81	89		15-24	16.7969
1827	Cariango	Female	NO	Kimbundu	Scondary education I cycle	NO	No	NO	YES	YES	YES	NO	NO	YES	NO	NO	YES	YES	YES	NO	NO	90	56		58	15-24	17.1468
1828	Cariango	Female	NO	Kimbundu	Primary education	NO	No	NO	NO	NO	YES	YES	YES	YES	NO	YES	NO	NO	NO	YES	NO	81	54		71	35-44	20.9321
1829	HDP	Male	NO	Kimbundu	University	NO	No	YES	YES	NO	YES	YES	NO	YES	YES	NO	NO	YES	YES	YES	NO	129	71	64		25-34	16.5606
1830	HDP	Male	NO	Bacongo	Secondary education II cycle	YES	Yes, sometimes	NO	YES	NO	YES	YES	NO	YES	YES	NO	NO	YES	YES	YES	NO	104	61		109	55+	15.9675
1831	HDP	Male	NO	Kimbundu	Primary education	NO	No	NO	YES	YES	NO	NO	NO	YES	NO	NO	NO	NO	YES	NO	NO	112	66		91	15-24	19.1512
1832	HDP	Male	NO	Kimbundu	Scondary education I cycle	NO	No	YES	NO	YES	NO	NO	YES	YES	YES	YES	YES	YES	YES	YES	NO	132	87		121	25-34	19.052
1833	HDP	Male	NO	Umbundo	Scondary education I cycle	NO	No	NO	YES	NO	YES	NO	YES	YES	YES	YES	NO	NO	YES	YES	NO	94	40	117		25-34	17.7832
1834	HDP	Male	NO	Bacongo	University	NO	No	YES	NO	NO	NO	NO	NO	YES	NO	NO	YES	NO	YES	YES	NO	119	71	82		35-44	19.8763
1835	HDP	Male	NO	Kimbundu	Secondary education II cycle	NO	No	NO	YES	NO	YES	NO	NO	YES	YES	NO	NO	NO	NO	NO	NO	132	82		94	25-34	23.7387
1836	HDP	Female	NO	Kimbundu	Scondary education I cycle	NO	No	NO	YES	YES	YES	NO	NO	YES	YES	YES	NO	NO	NO	YES	NO	104	62		68	15-24	14.5159
1837	HDP	Female	NO	Bacongo	Scondary education I cycle	NO	No	NO	YES	NO	NO	NO	NO	YES	YES	YES	NO	YES	NO	YES	NO	70	41		77	15-24	16.5889
1838	HDP	Male	NO	Umbundo	Primary education	YES	Yes, sometimes	NO	YES	NO	YES	YES	NO	YES	YES	NO	NO	YES	YES	YES	NO	75	41		107	25-34	15.4056
1839	HDP	Male	NO	Kimbundu	Primary education	NO	No	NO	YES	NO	YES	NO	YES	YES	YES	YES	YES	YES	YES	YES	NO			82		15-24	17.5278
1840	HDP	Male	NO	Kimbundu	Scondary education I cycle	NO	No	NO	YES	NO	YES	YES	NO	YES	YES	NO	YES	YES	YES	YES	NO	137	95	143		35-44
1841	HDP	Male	NO	Other	Scondary education I cycle	NO	Yes, sometimes	NO	YES	NO	YES	YES	NO	YES	YES	NO	NO	YES	YES	YES	NO	118	73	131		35-44	18.9388
1842	HDP	Male	NO	Kimbundu	Scondary education I cycle	NO	Yes, sometimes	NO	YES	YES	YES	YES	NO	YES	YES	NO	NO	YES	YES	YES	NO	113	64	124		25-34	17.8565
1843	HDP	Male	NO	Kimbundu	Primary education	YES	Yes, sometimes	NO	YES	NO	YES	YES	YES	YES	YES	NO	NO	YES	YES	YES	NO	86	67	164		35-44	13.7253
1844	HDP	Male	NO	Kimbundu	Scondary education I cycle	NO	Yes, sometimes	NO	YES	NO	YES	YES	NO	YES	YES	NO	NO	YES	YES	YES	NO	108	68		99	15-24	17.4413
1845	HDP	Female	NO	Kimbundu	Illiterate	NO	Yes, sometimes	NO	YES	NO	YES	NO	NO	YES	YES	NO	NO	YES	YES	YES	NO	100	60		73	55+	12.7383
1846	HDP	Male	NO	Bacongo	Secondary education II cycle	NO	No	NO	YES	NO	YES	YES	NO	YES	YES	NO	NO	YES	YES	YES	NO	94	55		70	15-24	17.7557
1847	HDP	Female	NO	Umbundo	Primary education	NO	Yes, sometimes	NO	YES	NO	YES	YES	NO	YES	YES	NO	NO	YES	YES	YES	NO	86	63		84	35-44	17.3604
1848	HDP	Female	NO	Bacongo	Illiterate	NO	No	NO	YES	NO	YES	YES	NO	YES	YES	NO	NO	YES	YES	YES	NO	86	63	101		15-24	19.0443
1849	HDP	Male	NO	Kimbundu	Scondary education I cycle	NO	Yes, sometimes	NO	YES	NO	YES	YES	NO	YES	YES	NO	NO	YES	YES	YES	NO	109	72		77	25-34	18.3391
1850	HDP	Female	NO	Bacongo	Secondary education II cycle	NO	No	NO	YES	NO	YES	YES	NO	YES	YES	NO	NO	YES	YES	YES	NO	92	57	78		25-34	16.2982
1851	HDP	Male	NO	Bacongo	Scondary education I cycle	NO	Yes, sometimes	NO	YES	YES	NO	NO	NO	YES	NO	YES	NO	NO	YES	NO	NO	86	55		59	15-24	22.2753
1852	HDP	Female	NO	Bacongo	Secondary education II cycle	NO	No	NO	YES	NO	NO	NO	NO	YES	NO	YES	YES	YES	YES	YES	NO	75	57	138		25-34	17.0068
1853	HDP	Female	NO	Bacongo	Illiterate	NO	No	NO	YES	NO	YES	NO	YES	YES	YES	YES	YES	YES	NO	YES	NO	83	53	123		35-44	17.1164
1854	HDP	Male	NO	Kimbundu	Primary education	NO	No	YES	YES	NO	NO	YES	NO	YES	YES	NO	NO	YES	YES	YES	NO	70	40		114	35-44	16.1059
1855	HDP	Male	NO	Kimbundu	Scondary education I cycle	YES	Yes, sometimes	NO	YES	NO	YES	YES	NO	YES	YES	NO	NO	YES	YES	YES	NO	104	66		60	25-34	17.9089
1856	HDP	Male	NO	Kimbundu	Primary education	NO	Yes, sometimes	NO	YES	NO	YES	YES	NO	YES	YES	NO	NO	NO	YES	YES	NO	80	60		122	35-44	14.1891
1857	HDP	Male	NO	Kimbundu	University	NO	No	NO	YES	NO	YES	YES	NO	YES	NO	NO	NO	NO	NO	YES	NO	122	80	69		15-24	18.7242
1858	HDP	Female	NO	Bacongo	Scondary education I cycle	NO	No	NO	YES	NO	YES	YES	NO	YES	NO	NO	NO	NO	NO	YES	NO	111	74		65	15-24	18.2868
1859	HDP	Male	NO	Kimbundu	Secondary education II cycle	YES	Yes, sometimes	YES	YES	YES	YES	YES	NO	YES	NO	NO	NO	NO	YES	YES	NO	112	68	68		35-44	20.984
1860	HDP	Male	NO	Bacongo	Scondary education I cycle	YES	Yes, sometimes	NO	YES	NO	YES	YES	NO	YES	NO	NO	NO	YES	YES	YES	NO	89	59	142		25-34	18.1312
1861	HDP	Male	NO	Umbundo	Primary education	YES	Yes, sometimes	NO	YES	NO	YES	YES	NO	YES	NO	NO	NO	YES	YES	YES	NO	96	65	54		25-34	14.881
1862	HDP	Male	NO	Kimbundu	Primary education	NO	No	NO	YES	NO	YES	YES	NO	YES	YES	YES	NO	NO	YES	YES	NO	87	48		77	35-44	16.937
1863	HDP	Male	NO	Kimbundu	Scondary education I cycle	YES	Yes, sometimes	NO	YES	NO	YES	YES	NO	YES	YES	NO	NO	NO	YES	YES	NO	99	64		82	35-44	18.2066
1864	Cariango	Male	NO	Other	Scondary education I cycle	NO	No	NO	YES	NO	NO	NO	NO	NO	YES	NO	NO	NO	YES	NO	YES	127	91		96	35-44	17.5056
1865	Cariango	Male	NO	Kimbundu	Scondary education I cycle	NO	No	NO	YES	NO	NO	NO	NO	YES	NO	YES	NO	NO	YES	NO	NO	108	61		77	15-24	21.9899
1866	Cariango	Male	NO	Kimbundu	Scondary education I cycle		No	NO	YES	NO	YES	YES	YES	YES	NO	NO	NO	NO	NO	NO	NO	96	69		69	25-34	16.7573
1867	Cariango	Male	NO	Kimbundu	Scondary education I cycle	NO	Yes, sometimes	NO	YES	YES	NO	YES	YES	YES	YES	YES	NO	YES	YES	YES	NO	177	85	85		25-34	16.2982
1868	Cariango	Male	NO	Kimbundu	Scondary education I cycle	NO	No	NO	YES	NO	NO	YES	YES	YES	YES	YES	YES	YES	YES	YES	NO	106	81		477	45-54	19.5312
1869	Cariango	Male	NO	Kimbundu	Scondary education I cycle	YES	No	NO	YES	NO	YES	YES	YES	YES	YES	YES	YES	YES	YES	YES	NO	103	80		80	35-44
1870	Cariango	Female	NO	Kimbundu	Scondary education I cycle	NO	No	NO	YES	NO	NO	NO	NO	YES	NO	NO	NO	NO	NO	NO	NO	114	78		80	15-24	16.8242
1871	Cariango	Female	NO	Kimbundu	Secondary education II cycle	NO	No	NO	YES	YES	YES	NO	YES	NO	NO	NO	NO	NO	YES	YES	NO	96	62		94	15-24	23.6244
1872	Cariango	Female	NO	Kimbundu	Scondary education I cycle	NO	No	NO	YES	NO	YES	YES	YES	YES	YES	YES	NO	YES	YES	YES	NO	97	75	93		25-34	14.6355
1873	Cariango	Male	NO	Kimbundu	Primary education	NO	No	NO	YES	YES	NO	YES	YES	YES	YES	YES	NO	NO	NO	NO	NO	179	106		87	55+	22.4323
1874	Cariango	Male	NO	Kimbundu	Primary education	YES	Yes, sometimes	NO	YES	NO	YES	YES	YES	YES	YES	YES	YES	NO	YES	NO	NO	137	80		78	35-44	16.7969
1875	Cariango	Female	NO	Kimbundu	Primary education	NO	No	NO	YES	NO	YES	NO	YES	YES	NO	YES	NO	YES	YES	NO	NO	150	93		108	55+	20.1726
1876	Cariango	Male	NO	Kimbundu	Secondary education II cycle	NO	No	NO	YES	NO	YES	YES	YES	YES	NO	YES	YES	YES	YES	YES	NO	129	83		55	15-24	21.2306
1877	Cariango	Male	NO	Kimbundu	Scondary education I cycle	NO	No	YES	YES	YES	NO	YES	YES	YES	NO	NO	YES	YES	YES	YES	NO	113	77		97	25-34	18.1662
1878	Cariango	Female	NO	Kimbundu	Scondary education I cycle	NO	No	NO	YES	NO	YES	YES	NO	YES	NO	YES	YES	NO	NO	YES	NO	116	74		85	35-44	21.9076
1879	Cariango	Female	NO	Kimbundu	Scondary education I cycle	NO	No	NO	YES	NO	YES	YES	NO	YES	YES	YES	YES	YES	YES	YES	NO	98	60	72		25-34	20
1880	Cariango	Male	NO	Umbundo	Scondary education I cycle	NO	No	NO	YES	YES	YES	YES	YES	YES	NO	YES	YES	NO	NO	NO	NO	103	65		106	25-34	19.3772
1881	Cariango	Male	NO	Kimbundu	Secondary education II cycle	NO	No	NO	YES	NO	YES	NO	NO	YES	NO	NO	NO	YES	NO	YES	NO	110	64		99	25-34	22.9854
1882	Cariango	Male	NO	Kimbundu	Scondary education I cycle	NO	No	NO	YES	NO	YES	YES	YES	YES	YES	YES	YES	NO	YES	YES	NO				71	15-24	16.3304
1883	Cariango	Female	NO	Other	Scondary education I cycle	NO	No	NO	YES	NO	NO	YES	YES	YES	NO	YES	YES	YES	YES	YES	NO	107	73		97	15-24	17.0392
1884	Cariango	Male	NO	Kimbundu	Illiterate	YES	Yes, sometimes	NO	YES	NO	NO	NO	NO	NO	NO	NO	NO	NO	NO	NO	NO	116	76		76	55+	15.1111
1885	Cariango	Female	NO	Kimbundu	Illiterate	NO	Yes, sometimes	NO	YES	NO	NO	NO	NO	NO	NO	NO	YES	NO	NO	NO	NO	147	69	157		55+	18.2899
1886	Cariango	Male	NO	Kimbundu	Scondary education I cycle	NO	Yes, sometimes	NO	YES	NO	YES	NO	NO	NO	YES	NO	NO	NO	NO	NO	NO	120	77	128		25-34	16.3593
1887	Cariango	Female	NO	Kimbundu	Primary education	NO	No	NO	YES	YES	NO	YES	YES	YES	YES	YES	YES	YES	YES	YES	YES	144	87		70	45-54	22.3703
1888	Cariango	Male	NO	Kimbundu	Secondary education II cycle	NO	No	NO	YES	NO	NO	NO	YES	YES	NO	NO	NO	YES	NO	NO	NO	100	80		56	15-24	15.0474
1889	Cariango	Female	NO	Kimbundu	Scondary education I cycle	NO	No	NO	YES	NO	YES	YES	YES	YES	YES	YES	YES	YES	YES	YES	NO	107	79	82		15-24	19.8189
1890	Cariango	Male	NO	Kimbundu	Scondary education I cycle	YES	Yes, sometimes	NO	YES	NO	YES	YES	YES	YES	YES	YES	YES	NO	YES	YES	NO	104	78		74	25-34	15.4183
1891	Cariango	Female	NO	Kimbundu	Primary education	NO	No	NO	YES	NO	YES	YES	YES	YES	NO	YES	YES	YES	YES	YES	NO	115	68		75	25-34	32.8892
1892	Cariango	Male	NO	Kimbundu	Scondary education I cycle	YES	Yes, sometimes	NO	YES	NO	YES	YES	YES	YES	YES	YES	YES	NO	NO	YES	NO				104	25-34	15.4959
1893	Cariango	Female	NO	Umbundo	Secondary education II cycle	NO	No	NO	NO	NO	YES	NO	YES	NO	NO	NO	NO	NO	NO	NO	NO	128	83		71	15-24	17.7999
1894	Cariango	Female	NO	Umbundo	Scondary education I cycle	NO	Yes, sometimes	NO	YES	NO	YES	NO	NO	YES	YES	NO	NO	NO	NO	NO	NO	125	87			25-34	21.2279
1895	Cariango	Female	NO	Kimbundu	Primary education	NO	No	NO	YES	YES	YES	YES	YES	YES	NO	YES	YES	YES	YES	YES	NO	89	61		77	25-34	16.6133
1896	Cariango	Female	NO	Kimbundu	Secondary education II cycle	NO	No	NO	YES	NO	YES	YES	NO	YES	NO	YES	YES	NO	NO	YES	NO	79			92	15-24	18.6115
1897	Cariango	Female	NO	Kimbundu	Primary education	NO	No	NO	NO	NO	YES	YES	NO	YES	NO	YES	YES	YES	NO	NO	NO	107	80		82	35-44	17.1029
1898	Cariango	Female	NO	Other	Scondary education I cycle	NO	No	NO	YES	NO	YES	YES	YES	YES	YES	YES	YES	YES	YES	YES	NO				90	25-34
1899	Cariango	Female	NO	Kimbundu	Secondary education II cycle	NO	No	NO	YES	NO	YES	YES	NO	YES	YES	YES	YES	NO	NO	YES	NO	81	63	86		15-24
1900	Cariango	Female	NO	Kimbundu	Secondary education II cycle	NO	No	NO	YES	NO	YES	NO	NO	YES	YES	NO	NO	NO	NO	NO	NO	138	74		70	15-24	35.4367
1901	Cariango	Male	NO	Bacongo	Primary education	NO	No	NO	YES	NO	NO	YES	NO	YES	NO	NO	YES	NO	YES	YES	NO	138	112		78	45-54	17.5556
1902	Cariango	Female	NO	Kimbundu	Scondary education I cycle	NO	No	NO	YES	NO	YES	YES	NO	YES	YES	YES	NO	NO	YES	NO	NO	132	79	100		25-34
1903	Cariango	Female	NO	Kimbundu	Scondary education I cycle	NO	No	YES	YES	NO	NO	YES	NO	YES	NO	YES	NO	NO	NO	YES	YES	152	112	146		45-54	21.58
1904	Cariango	Female	NO	Kimbundu	Scondary education I cycle	NO	No	NO	YES	NO	YES	YES	YES	YES	YES	YES	NO	NO	YES	YES	NO	102	70	79		25-34
1905	Cariango	Female	NO	Kimbundu	Scondary education I cycle	NO	No	NO	YES	NO	YES	YES	YES	YES	YES	YES	YES	YES	NO	YES	NO	101	70		95	15-24	16.0037
1906	Cariango	Female	NO	Kimbundu	Illiterate	NO	No	NO	YES	NO	YES	NO	NO	YES	NO	YES	NO	YES	YES	NO	YES	176	99		89	55+	24.3865
1907	Cariango	Male	NO	Kimbundu	Scondary education I cycle	NO	No	NO	NO	NO	NO	NO	NO	NO	NO	NO	NO	NO	NO	NO	YES	175	120		155	55+	19.0311
1908	Cariango	Female	NO	Kimbundu	Scondary education I cycle	NO	No	NO	YES	YES	YES	YES	NO	YES	NO	YES	NO	NO	NO	NO	NO	119	69		77	15-24	19.2277
1909	Cariango	Female	NO	Kimbundu	Scondary education I cycle	NO	No	YES	YES	NO	YES	YES	YES	YES	YES	YES	YES	YES	YES	YES	YES	120	80		70	35-44
1910	Cariango	Male	NO	Kimbundu	Secondary education II cycle	NO	Yes, sometimes	NO	YES	NO	YES	YES	YES	YES	NO	NO	NO	YES	YES	YES	YES	101	77		96	35-44
1911	Cariango	Female	NO	Kimbundu	Secondary education II cycle	NO	Yes, sometimes	NO	YES	NO	YES	YES	YES	YES	YES	YES	NO	NO	YES	YES	NO	122	89		63	25-34	20.8889
1912	Cariango	Male	NO	Kimbundu	Scondary education I cycle	NO	No	NO	YES	YES	YES	YES	YES	YES	YES	YES	NO	NO	NO	NO	NO	87	52		67	25-34	15.2353
1913	Cariango	Male	NO	Kimbundu	Primary education	YES	Yes, sometimes	NO	YES	NO	YES	YES	YES	YES	YES	YES	YES	YES	YES	YES	NO	122	84		85	25-34	17.6471
1914	Cariango	Female	NO	Kimbundu	Scondary education I cycle	NO	No	NO	YES	NO	YES	YES	YES	YES	YES	YES	YES	YES	YES	YES	NO	90	80		125	25-34	15.8173
1915	Cariango	Female	NO	Kimbundu	Illiterate	YES	Yes, sometimes	NO	YES	NO	NO	NO	NO	YES	NO	NO	YES	NO	NO	NO	YES	90	70	98		55+	15.0457
1916	Cariango	Female	NO	Kimbundu	Primary education	NO	Yes, sometimes	NO	YES	YES	YES	YES	YES	YES	YES	YES	YES	YES	YES	YES	NO	102	61		66	35-44	16.609
1917	Cariango	Male	NO	Kimbundu	Primary education	NO	No	YES	YES	NO	YES	YES	YES	YES	YES	YES	NO	NO	YES	YES	YES	133	90		98	55+	18.0802
1918	Cariango	Male	NO	Kimbundu	Secondary education II cycle	NO	No	NO	YES	NO	YES	NO	YES	NO	NO	NO	NO	NO	NO	NO	YES	113	71	91		35-44	17.239
1919	Cariango	Male	NO	Kimbundu	Scondary education I cycle	NO	No	NO	YES	NO	NO	YES	YES	YES	YES	NO	NO	NO	NO	YES	NO	98	70		69	35-44	17.9089
1920	Cariango	Female	NO	Kimbundu	Illiterate	NO	No	NO	YES	YES	YES	YES	YES	YES	YES	YES	NO	NO	NO	YES	NO	99	62		90	25-34	19.6311
1921	Cariango	Female	NO	Kimbundu	Illiterate	NO	No	NO	NO	NO	YES	NO	YES	YES	YES	NO	YES	NO	NO	YES	YES	149	87		81	45-54	20.3619
1922	Cariango	Male	NO	Kimbundu	Secondary education II cycle	NO	No	NO	YES	NO	YES	YES	YES	YES	NO	YES	NO	YES	NO	NO	NO	67	43		79	15-24	20.0796
1923	Cariango	Female	NO	Kimbundu	Primary education	NO	No	NO	NO	NO	NO	YES	YES	YES	NO	YES	YES	NO	YES	YES	YES	137	95		90	45-54
1924	Cariango	Male	NO	Kimbundu	Secondary education II cycle	NO	No	YES	YES	NO	YES	YES	NO	YES	NO	NO	NO	YES	NO	NO	NO	123	90		71	15-24	18.4425
1925	Cariango	Male	NO	Kimbundu		YES	Yes, sometimes	YES	YES	NO	NO	YES	YES	YES	NO	YES	NO	NO	YES	NO	YES	121	74		88	45-54	17.4747
1926	Cariango	Male	NO	Kimbundu	Scondary education I cycle	NO	Yes, sometimes	NO	YES	NO	YES	NO	NO	YES	YES	YES	YES	YES	NO	NO	YES	114	67		75	25-34	17.3744
1927	Cariango	Female	NO	Kimbundu	Primary education	YES	No	NO	YES	NO	YES	YES	NO	YES	NO	YES	YES	YES	YES	NO	NO	111	76		71	45-54	24.0344
1928	Cariango	Female	NO	Kimbundu	Scondary education I cycle	NO	No	NO	YES	NO	YES	NO	NO	NO	NO	NO	YES	NO	NO	NO	NO	128	81		71	35-44	17.5064
1929	Cariango	Female	NO	Kimbundu	Primary education	NO	Yes, sometimes	NO	YES	NO	YES	NO	NO	YES	NO	YES	NO	YES	NO	NO	YES	170	104		93	55+	27.0552
1930	Cariango	Female	NO	Kimbundu	Illiterate	NO	No	NO	YES	NO	YES	YES	YES	YES	YES	YES	YES	YES	YES	YES	YES	142	90		70	55+	18.9745
1931	Cariango	Female	NO	Kimbundu	Illiterate	YES	Yes, sometimes	NO	YES	NO	YES	YES	YES	NO	NO	YES	NO	NO	YES	YES	YES	175			77	55+	16.0145
1932	Cariango	Female	NO	Kimbundu	Scondary education I cycle	NO	No	NO	YES	YES	YES	YES	NO	YES	NO	NO	YES	YES	YES	YES	NO	102	73		70	35-44	19.2894
1933	Cariango	Male	NO	Kimbundu	Secondary education II cycle	NO	No	NO	YES	YES	YES	YES	YES	YES	YES	YES	NO	NO	NO	NO	NO	108	63		80	15-24	20.3244
1934	Cariango	Female	NO	Kimbundu	Secondary education II cycle	NO	No	YES	YES	NO	YES	YES	YES	YES	NO	YES	YES	YES	YES	YES	NO	137	110		73	15-24	20.1956
1935	Cariango	Male	NO	Other	Scondary education I cycle	YES	Yes, sometimes	NO	YES	NO	NO	NO	NO	NO	NO	NO	YES	NO	NO	NO	NO	118	76		76	25-34	17.1563
1936	Cariango	Female	NO	Kimbundu	Scondary education I cycle	NO	No	NO	NO	NO	YES	YES	NO	YES	NO	YES	YES	YES	YES	YES	NO	125	85		76	35-44	20.9572
1937	Cariango	Female	NO	Kimbundu	Secondary education II cycle	NO	Yes, sometimes	YES	NO	NO	YES	NO	NO	YES	NO	NO	YES	NO	NO	NO	YES	101	65		86	35-44	19.5312
1938	Cariango	Female	NO	Kimbundu	Illiterate	NO	No	NO	YES	NO	NO	YES	YES	YES	NO	NO	NO	YES	YES	NO	YES	122	86		107	25-34	21.0938
1939	Cariango	Female	NO	Kimbundu	Primary education	NO	No	YES	YES	NO	NO	YES	YES	YES	YES	YES	YES	YES	YES	YES	NO	135	92		96	45-54	15.4006
1940	DAT	Female	NO	Kimbundu	Illiterate	NO	No	NO	YES	NO	YES	NO	NO	YES	NO	NO	NO	NO	NO	YES	NO	116	69		104	55+	23.5294
1941	DAT	Female	NO	Other	Secondary education II cycle	NO	No	NO	NO	NO	NO	NO	NO	YES	NO	NO	NO	NO	NO	YES	YES	116	76		73	15-24	26.8136
1942	DAT	Female	NO	Kimbundu	Secondary education II cycle	NO	No	NO	NO	NO	YES	NO	NO	YES	NO	NO	NO	NO	NO	YES	NO	136	81	119		35-44	37.5
1943	DAT	Female	NO		Illiterate	NO	No	NO	NO	NO	NO	NO	NO	YES	NO	NO	NO	NO	NO	YES	YES	117	74		158	55+	30.4688
1944	DAT	Female	NO	Kimbundu	Scondary education I cycle	NO	No	NO	YES	NO	YES	NO	NO	YES	NO	NO	NO	NO	NO	YES	YES	165	116		89	55+	23.533
1945	DAT	Female	NO	Kimbundu	Scondary education I cycle	NO	No	YES	NO	NO	YES	NO	NO	YES	NO	NO	NO	NO	NO	YES	YES	158	93		92	25-34	25.3906
1946	DAT	Male	NO	Kimbundu	University	NO	No	NO	YES	NO	YES	NO	NO	YES	NO	NO	NO	NO	NO	YES	NO	91	44	89		35-44	20.0288
1947	DAT	Female	NO	Kimbundu	Scondary education I cycle	NO	No	NO	YES	NO	YES	NO	NO	YES	NO	NO	NO	NO	NO	YES	NO	115	78	114		15-24	17.3611
1948	DAT	Male	NO	Kimbundu	Primary education	NO	No	YES	YES	NO	NO	NO	NO	YES	NO	NO	NO	NO	NO	YES	NO	107	60	95		25-34	15.7313
1949	DAT	Female	NO	Kimbundu	University	NO	No	NO	YES	NO	NO	NO	NO	YES	NO	NO	NO	NO	NO	YES	NO	129	82	104		25-34	24.3141
1950	DAT	Female	NO	Umbundo	Primary education	NO	No	YES	YES	NO	YES	NO	NO	YES	NO	NO	NO	NO	NO	YES	NO	106	66		82	15-24	16.4446
1951	DAT	Female	NO	Kimbundu	Primary education	NO	No	NO	YES	NO	NO	NO	NO	YES	NO	NO	NO	NO	NO	YES	NO				59	15-24	14.6788
1952	DAT	Male	NO	Bacongo	Primary education	NO	No	NO	YES	NO	YES	NO	NO	YES	NO	NO	NO	NO	NO	YES	NO	131	64		89	55+	18.2183
1953	DAT	Female	NO	Bacongo	University	NO	No	YES	YES	NO	NO	NO	NO	YES	NO	NO	NO	NO	NO	YES	NO	98	67	64		15-24	15.7943
1954	DAT	Female	NO	Umbundo	Primary education	NO	No	NO	YES	NO	YES	NO	NO	NO	NO	NO	NO	NO	NO	NO	NO	182	106		73	45-54	40.8588
1955	DAT	Female	NO	Kimbundu	Illiterate	NO	No	NO	NO	NO	YES	NO	NO	YES	NO	NO	NO	NO	NO	YES	NO	111	73	108		35-44	27.4077
1956	DAT	Female	NO	Kimbundu	Scondary education I cycle	NO	Yes, sometimes	YES	YES	NO	NO	NO	NO	YES	NO	NO	NO	NO	NO	NO	NO	114	77	90		25-34	19.3625
1957	DAT	Female	NO	Other	University	NO	No	NO	NO	NO	YES	NO	NO	YES	NO	NO	NO	NO	NO	YES	YES	101	65	77		35-44
1958	DAT	Female	NO	Kimbundu	Secondary education II cycle	NO	Yes, sometimes	NO	NO	NO	YES	NO	NO	YES	NO	NO	YES	YES	YES	YES	NO	108	75	91		25-34	22.2656
1959	DAT	Female	NO	Kimbundu	Primary education	NO	No	NO	YES	NO	NO	NO	NO	YES	NO	NO	YES	YES	YES	YES	YES	162	125	100		45-54	31.25
1960	DAT	Female	NO	Kimbundu	Scondary education I cycle	NO	No	NO	YES	NO	YES	NO	NO	YES	NO	NO	NO	NO	NO	YES	YES	130	89	92		45-54	31.5556
1961	DAT	Female	NO	Kimbundu	Secondary education II cycle	NO	No	NO	YES	NO	YES	NO	NO	NO	NO	NO	NO	NO	NO	YES	NO	113	65		99	15-24	27.7344
1962	DAT	Male	NO	Kimbundu	Secondary education II cycle	NO	Yes, sometimes	NO	NO	NO	YES	NO	NO	NO	NO	NO	NO	NO	NO	YES	NO	144	93		115	45-54	28.0277
1963	DAT	Male	NO	Umbundo	Secondary education II cycle	NO	Yes, sometimes	YES	NO	YES	NO	NO	YES	NO	NO	NO	NO	NO	NO	YES	NO	114	84		70	25-34	21.2183
1964	DAT	Female	NO	Kimbundu	Secondary education II cycle	NO	No	NO	YES	NO	NO	NO	NO	YES	NO	NO	NO	NO	NO	YES	NO	112	67		108	25-34	23.7954
1965	DAT	Female	NO	Umbundo	Primary education	NO	No	NO	YES	NO	NO	NO	NO	YES	NO	NO	NO	NO	NO	NO	NO	161	91		84	55+	22.913
1966	DAT	Female	NO	Umbundo	University	NO	Yes, sometimes	NO	NO	NO	NO	NO	NO	NO	NO	NO	NO	NO	NO	NO	YES	149	98	87		35-44	31.3146
1967	DAT	Female	NO	Kimbundu	Illiterate	NO	No	NO	YES	NO	YES	NO	NO	YES	NO	NO	NO	NO	NO	YES	NO	217	96		86	55+	30.8594
1968	DAT	Male	NO	Kimbundu	Secondary education II cycle	NO	Yes, sometimes	NO	NO	NO	NO	NO	NO	YES	NO	NO	NO	NO	NO	YES	NO	98	70		62	15-24	20.0692
1969	DAT	Male	NO	Umbundo		NO	Yes, sometimes	YES	NO	YES	NO	NO	YES	NO	NO	NO	NO	NO	NO	YES	NO			107		35-44	14.8721
1970	DAT	Female	NO	Other	Secondary education II cycle	NO	No	NO	YES	NO	NO	NO	NO	YES	NO	NO	NO	NO	NO	YES	NO	98	63		72	15-24	18.1312
1971	DAT	Female	NO	Kimbundu	Scondary education I cycle	NO	No	NO	YES	NO	YES	NO	NO	YES	NO	NO	NO	NO	NO	YES	NO	111	63	94	72	25-34	17.6308
1972	DAT	Female	NO	Umbundo	University	NO	No	NO	YES	NO	YES	NO	NO	YES	NO	NO	NO	NO	NO	YES	NO	121	64	95		15-24	17.9418
1973	DAT	Female	NO	Bacongo	Secondary education II cycle	NO	Yes, sometimes	NO	NO	NO	YES	NO	NO	YES	NO	NO	NO	NO	NO	NO	YES	143	110		93	45-54	32.8892
1974	DAT	Female	NO	Kimbundu	Scondary education I cycle	NO	No	NO	YES	NO	YES	NO	NO	YES	NO	NO	NO	NO	NO	YES	NO	95	63			25-34	13.2716
1975	DAT	Female	NO	Kimbundu		NO	No	YES	YES	NO	YES	NO	NO	NO	NO	NO	NO	NO	NO	YES	NO	143	88		96	35-44	25.0399
1976	DAT	Male	NO	Kimbundu	University	NO	Yes, sometimes	YES	NO	NO	NO	NO	NO	YES	NO	NO	NO	NO	NO	YES	NO	92	71	76		35-44	15.1496
1977	DAT	Female	NO	Bacongo	Scondary education I cycle	NO	No	NO	YES	NO	YES	NO	NO	YES	NO	NO	NO	NO	NO	YES	NO	100	63		79	25-34	17.8465
1978	DAT	Female	NO	Kimbundu	Scondary education I cycle	NO	Yes, sometimes	YES	YES	YES	YES	NO	NO	YES	YES	YES	YES	YES	YES	YES	NO				75	15-24	12.8906
1979	DAT	Female	NO	Umbundo		NO	No	NO	YES	NO	YES	NO	NO	NO	NO	NO	NO	NO	NO	NO	NO	114	68		111	55+	21.0938
1980	DAT	Female	NO	Other	Illiterate	NO	No	YES	YES	NO	YES	NO	NO	YES	NO	NO	NO	NO	NO	YES	YES	138	81		91	55+	28.125
1981	DAT	Female	NO	Kimbundu	Scondary education I cycle	NO	No	NO	YES	YES	YES	YES	YES	YES	NO	YES	YES	YES	YES	YES	YES	129	72		75	55+
1982	DAT	Female	NO	Umbundo	Secondary education II cycle	NO	No	YES	YES	NO	NO	NO	NO	NO	NO	NO	NO	NO	NO	YES	NO	116	76	123		25-34	26.9127
1983	DAT	Male	NO	Kimbundu	University	NO	No	NO	NO	NO	YES	NO	NO	NO	NO	NO	NO	NO	NO	YES	NO	132	79		98	55+	18.8588
1984	DAT	Male	NO	Kimbundu	Secondary education II cycle	NO	Yes, sometimes	NO	NO	YES	NO	NO	YES	NO	NO	NO	NO	NO	NO	NO	NO	124	74		102	25-34	22.4914
1985	DAT	Female	NO	Other	Scondary education I cycle	NO	No	NO	YES	NO	YES	NO	NO	YES	NO	NO	NO	NO	NO	YES	NO	116	76	121		25-34	31.6263
1986	DAT	Male	NO	Kimbundu	Primary education	NO	No	NO	YES	NO	YES	NO	NO	NO	NO	NO	NO	NO	NO	YES	YES	158	110	101		35-44	23.2254
1987	DAT	Female	NO	Kimbundu	Secondary education II cycle	NO	No	YES	NO	NO	NO	NO	NO	YES	NO	NO	NO	NO	NO	YES	NO	138	91		101	35-44	33.1213
1988	DAT	Female	NO	Kimbundu	University	NO	No	NO	YES	NO	NO	NO	NO	YES	NO	NO	NO	NO	NO	YES	NO	106	45		106	15-24	23.8751
1989	DAT	Female	NO	Other	Scondary education I cycle	NO	No	NO	YES	NO	YES	NO	NO	YES	NO	NO	NO	NO	NO	YES	YES	118	64	91		15-24	23.7954
1990	DAT	Male	NO	Bacongo	University	NO	No	NO	YES	NO	YES	NO	NO	YES	NO	NO	NO	NO	NO	YES	NO	95	57	80		25-34	20.0773
1991	DAT	Female	NO	Kimbundu	Scondary education I cycle	NO	Yes, sometimes	NO	NO	NO	YES	NO	NO	YES	NO	NO	NO	NO	NO	YES	YES	121	82	148		35-44	16.8525
1992	DAT	Female	NO	Bacongo	Secondary education II cycle	NO	No	NO	YES	NO	YES	NO	NO	YES	NO	NO	NO	NO	NO	YES	NO		71		359	25-34	17.6308
1993	DAT	Male	NO	Bacongo	Scondary education I cycle	NO	NO	NO	YES	NO	YES	NO	NO	YES	YES	YES	NO	NO	NO	NO	NO	160	107		219	45-54	24.093
1994	DAT	Male	NO	Other	Primary education	NO	No	NO	YES	NO	YES	NO	NO	NO	YES	NO	YES	YES	YES	YES	YES	203	142		165	55+	29.6875
1995	DAT	Female	NO	Umbundo	Scondary education I cycle	NO	No	NO	YES	NO	YES	YES	NO	YES	YES	YES	NO	NO	NO	NO	NO	127	81		101	25-34	24.2123
1996	DAT	Male	NO	Kimbundu	Scondary education I cycle	NO	Yes, sometimes	NO	YES	NO	NO	NO	NO	YES	YES	NO	NO	YES	YES	NO	NO	111	83		111	45-54	20.9573
1997	DAT	Female	NO	Other	Secondary education II cycle	NO	NO	NO	YES	NO	YES	YES	YES	YES	YES	YES	YES	YES	YES	YES	NO	109	79		74	15-24	24.4561
1998	DAT	Female	NO	Kimbundu	Primary education	NO	No	NO	NO	NO	NO	NO	NO	NO	NO	NO	NO	NO	NO	NO	NO	143	92	111		25-34	30.4867
1999	DAT	Female	NO	Kimbundu	Secondary education II cycle	NO	No	NO	YES	NO	YES	YES	NO	YES	YES	YES	YES	YES	YES	NO	NO	115	82	73		35-44	31.2092
2000	DAT	Male	NO	Kimbundu	Secondary education II cycle	NO	No	NO	YES	NO	YES	NO	NO	NO	NO	NO	NO	NO	NO	NO	NO	142	95	103		45-54	25
2001	DAT	Female	NO	Umbundo	Illiterate	NO	No	NO	YES	NO	YES	NO	NO	NO	NO	NO	YES	YES	YES	YES	NO	124	73	169		35-44	30.8444
2002	DAT	Male	NO	Kimbundu	Primary education	NO	No	NO	YES	NO	YES	NO	NO	NO	NO	NO	NO	NO	NO	NO	NO	121	68	140		15-24	21.7994
2003	DAT	Male	NO	Umbundo	Scondary education I cycle	NO	No	NO	YES	NO	YES	NO	NO	NO	NO	NO	NO	NO	NO	NO	NO	124	80		100	35-44	16.937
2004	DAT	Female	NO	Kimbundu		NO	No	YES	YES	NO	YES	NO	NO	NO	NO	NO	NO	NO	NO	NO	NO	92	64		78	25-34	14.6667
2005	DAT	Male	NO	Kimbundu		NO	No	NO	YES	NO	YES	NO	NO	NO	NO	NO	NO	NO	NO	NO	NO	132	82		102	55+	23.0469
2006	DAT	Male	NO		Scondary education I cycle	NO	No	NO	YES	NO	YES	NO	NO	NO	NO	NO	NO	NO	NO	NO	NO	115	71		64	15-24
2007	DAT	Male	NO	Umbundo		NO	No	NO	YES	NO	YES	NO	NO	NO	NO	NO	NO	NO	NO	NO	NO	109	76	76		25-34	20.8209
2008	DAT	Female	NO		Primary education	NO	No	YES	YES	NO	YES	NO	NO	NO	NO	NO	NO	NO	NO	NO	NO	113	76		73	25-34	26.493
2009	DAT	Male	NO	Kimbundu	Secondary education II cycle	NO	No	NO	YES	NO	YES	NO	NO	NO	NO	NO	NO	NO	NO	NO	NO	119	79	124		25-34	19.6283
2010	DAT	Male	NO	Umbundo	Primary education	YES	Yes, sometimes	NO	YES	NO	YES	NO	NO	NO	NO	NO	NO	NO	NO	NO	NO	134	88		93	45-54	17.3134
2011	DAT	Female	NO	Umbundo	Illiterate	NO	No	YES	YES	NO	YES	NO	NO	NO	NO	NO	YES	YES	YES	YES	NO	178	118	117		45-54
2012	DAT	Female	NO	Kimbundu		NO	No	NO	YES	NO	YES	NO	NO	NO	NO	NO	NO	NO	NO	NO	NO	107	69		62	25-34	17.8465
2013	Cacuaco	Male	NO	Umbundo	Scondary education I cycle	NO	Yes, sometimes	NO	YES	NO	YES	NO	NO	YES	NO	YES	NO	NO	NO	YES	YES	213	142		78	45-54	23.9995
2014	Cacuaco	Male	NO	Umbundo	Primary education	NO	No	NO	YES	NO	YES	NO	NO	YES	YES	NO	NO	NO	NO	NO	NO				56	15-24	12.4205
2015	Cacuaco	Female	NO	Umbundo	Illiterate	NO	No	YES	YES	NO	NO	YES	YES	YES	NO	YES	NO	NO	NO	NO	NO	94	51		62	35-44	20.2848
[truncated: 5,206 more rows]
